# Supplementary material for: Altered Gene Synchrony Suggests a Combined Hormone-Mediated Dysregulated State in Major Depression
Source: PLoS One. 2010 Apr 1;5(4):e9970. doi: 10.1371/journal.pone.0009970 (PMC2848620; doi:10.1371/journal.pone.0009970)
Supplement: File S2 — Complete per-probeset amygdala-anterior cingulate cortex coordination levels and p-values. (0.75 MB XLS) [file pone.0009970.s002.xls]

## Sheet: ctrl
probeset	Gene symbol	Gene Title	Ctrl R	MDD R	MDD-Ctrl (ΔR)	Low in MDD p-value	sig. at FDR of .	High in MDD p-value	sig. at FDR of .
1053_at	RFC2	replication factor C (activator 1) 2, 40kDa	0.43508	0.89153	0.45645	0.9415		0.0585
1552274_at	PXK	PX domain containing serine/threonine kinase	0.68387	0.44239	-0.24148	0.0808		0.9192
1552283_s_at	ZDHHC11	zinc finger, DHHC-type containing 11	0.7238	0.79755	0.073752	0.7316		0.2684
1552310_at	C15ORF40	chromosome 15 open reading frame 40	0.40892	0.70881	0.29988	0.81605		0.18395
1552426_a_at	TM2D3	TM2 domain containing 3	0.30335	0.69958	0.39623	0.9626		0.0374
1552621_at	POLR2J2	polymerase (RNA) II (DNA directed) polypeptide J2	0.72185	0.82496	0.10311	0.7588		0.2412
1552626_a_at	TMEM163	transmembrane protein 163	-0.18424	0.73296	0.9172	0.996		0.004	0.25
1552701_a_at	CARD16	caspase recruitment domain family, member 16	0.70465	0.11272	-0.59193	0.01815		0.98185
1552722_at	ARPP-21	cyclic AMP-regulated phosphoprotein, 21 kD	0.70322	0.3886	-0.31462	0.1135		0.8865
1552931_a_at	PDE8A	phosphodiesterase 8A	0.69877	0.46865	-0.23012	0.2089		0.7911
1553037_a_at	SYN2	synapsin II	0.78797	0.56427	-0.2237	0.22755		0.77245
1553108_at	C5ORF24	chromosome 5 open reading frame 24	0.74945	0.088837	-0.66061	0.0237		0.9763
1553118_at	THEM4	thioesterase superfamily member 4	0.71503	0.54886	-0.16617	0.24055		0.75945
1553133_at	C9ORF72	chromosome 9 open reading frame 72	0.91566	0.50116	-0.4145	0.2216		0.7784
1553193_at	ZNF441	zinc finger protein 441	0.76486	0.47559	-0.28927	0.19215		0.80785
1553271_at	DIP2B	DIP2 disco-interacting protein 2 homolog B (Drosophila)	0.39569	0.70656	0.31086	0.90705		0.09295
1553551_s_at	ND2	NADH dehydrogenase, subunit 2 (complex I)	0.69632	-0.2181	-0.91442	0.0037	0.2	0.9963
1553677_a_at	TIPRL	TIP41, TOR signaling pathway regulator-like (S. cerevisiae)	0.6711	0.74747	0.076364	0.60555		0.39445
1553704_x_at	ZNF791	zinc finger protein 791	0.69866	0.56989	-0.12877	0.2681		0.7319
1553796_at	FLJ30594	hypothetical locus FLJ30594	0.73046	-0.043491	-0.77395	0.00125	0.2	0.99875
1553864_at	DKFZP761H2121	hypothetical protein DKFZp761H2121	0.27172	0.77055	0.49883	0.988		0.012	0.3
1553971_a_at	TCAG7.1177	opposite strand transcription unit to STAG3	0.33925	0.79993	0.46068	0.92145		0.07855
1554004_a_at	RGNEF	Rho-guanine nucleotide exchange factor	0.069671	0.88713	0.81746	0.99725		0.00275	0.25
1554018_at	GPNMB	glycoprotein (transmembrane) nmb	0.8055	0.68583	-0.11967	0.2927		0.7073
1554093_a_at	SNAPC5	small nuclear RNA activating complex, polypeptide 5, 19kDa	0.55663	0.73406	0.17742	0.6309		0.3691
1554181_at	SNX32	sorting nexin 32	0.64536	0.75686	0.1115	0.68115		0.31885
1554287_at	TRIM4	tripartite motif-containing 4	-0.16874	0.8037	0.97244	0.99695		0.00305	0.25
1554306_at	ITPKB	inositol 1,4,5-trisphosphate 3-kinase B	0.88465	0.2374	-0.64725	0.1234		0.8766
1554351_a_at	TIPRL	TIP41, TOR signaling pathway regulator-like (S. cerevisiae)	0.67709	0.69824	0.021147	0.5454		0.4546
1554452_a_at	HIG2	hypoxia-inducible protein 2	0.99594	0.26333	-0.7326	0.074		0.926
1554482_a_at	SAR1B	SAR1 homolog B (S. cerevisiae)	0.72097	-0.10404	-0.82502	0.0044	0.2	0.9956
1554509_a_at	C10ORF97	chromosome 10 open reading frame 97	0.36409	0.77615	0.41205	0.89985		0.10015
1554593_s_at	SLC1A6	solute carrier family 1 (high affinity aspartate/glutamate transporter), member 6	0.20389	0.69185	0.48796	0.926		0.074
1554643_at	RGS11	regulator of G-protein signaling 11	0.18431	0.73149	0.54718	0.81055		0.18945
1554689_a_at	NLGN4X	neuroligin 4, X-linked	0.82878	0.24372	-0.58506	0.0041	0.2	0.9959
1554706_at	OR2L13	olfactory receptor, family 2, subfamily L, member 13	0.62717	0.82367	0.1965	0.779		0.221
1554747_a_at	2009-09-02	septin 2	0.84454	0.17872	-0.66582	0.0007	0.15	0.9993
1554789_a_at	PDE8B	phosphodiesterase 8B	0.6817	0.64471	-0.036987	0.444		0.556
1554801_at	C5ORF40	chromosome 5 open reading frame 40	0.13317	0.80562	0.67245	0.99395		0.00605	0.25
1554810_at	PLA2G4C(includesEG:8605)	phospholipase A2, group IVC (cytosolic, calcium-independent)	0.058365	0.83957	0.78121	0.9114		0.0886
1555123_at	ST6GAL2	ST6 beta-galactosamide alpha-2,6-sialyltranferase 2	0.52813	0.67981	0.15168	0.82325		0.17675
1555241_at	C8ORF59	chromosome 8 open reading frame 59	0.78126	0.6025	-0.17876	0.2401		0.7599
1555311_at	RAB22A	RAB22A, member RAS oncogene family	0.092036	0.79635	0.70432	0.92255		0.07745
1555318_at	HIF3A	hypoxia inducible factor 3, alpha subunit	0.85179	0.36417	-0.48762	0.0333		0.9667
1555363_s_at	MGC39821	hypothetical protein MGC39821	0.71768	0.051075	-0.6666	0.06545		0.93455
1555618_s_at	SAE1	SUMO1 activating enzyme subunit 1	0.6808	0.53931	-0.1415	0.30315		0.69685
1555653_at	HNRNPA3	heterogeneous nuclear ribonucleoprotein A3	0.79422	0.42748	-0.36674	0.07		0.93
1555764_s_at	TIMM10	translocase of inner mitochondrial membrane 10 homolog (yeast)	0.40772	0.74183	0.3341	0.8313		0.1687
1555812_a_at	ARHGDIB	Rho GDP dissociation inhibitor (GDI) beta	0.69677	0.24934	-0.44743	0.11165		0.88835
1555832_s_at	KLF6	Kruppel-like factor 6	0.752	0.72973	-0.022261	0.43015		0.56985
1555847_a_at	LOC284454	hypothetical protein LOC284454	0.23798	0.80319	0.56521	0.70435		0.29565
1555881_s_at	LZTS2	leucine zipper, putative tumor suppressor 2	0.20637	0.72348	0.51711	0.9575		0.0425
1555892_s_at	LOC253039	hypothetical LOC253039	0.88627	0.79765	-0.088624	0.1896		0.8104
1555902_at	ARMCX5	armadillo repeat containing, X-linked 5	0.73387	0.73209	-0.0017803	0.4933		0.5067
1555906_s_at	C3ORF23	chromosome 3 open reading frame 23	0.78366	0.60353	-0.18013	0.15525		0.84475
1555961_a_at	HINT1(includesEG:3094)	histidine triad nucleotide binding protein 1	0.28826	0.8263	0.53805	0.80965		0.19035
1555989_at	DAAM1	dishevelled associated activator of morphogenesis 1	0.76616	0.95961	0.19345	0.9899		0.0101	0.3
1556000_s_at	BTBD7	BTB (POZ) domain containing 7	0.027983	0.73588	0.7079	0.9883		0.0117	0.3
1556155_at	ARL8A	ADP-ribosylation factor-like 8A	0.25423	0.75398	0.49975	0.9062		0.0938
1556285_s_at	PPA2	pyrophosphatase (inorganic) 2	0.69467	0.65925	-0.03542	0.4454		0.5546
1556378_a_at	LOC440896	hypothetical gene LOC440896	0.80055	0.43568	-0.36486	0.3758		0.6242
1556423_at	VASH1	vasohibin 1	0.32668	0.77487	0.44819	0.87955		0.12045
1556599_s_at	ARPP-21	cyclic AMP-regulated phosphoprotein, 21 kD	0.7451	0.57875	-0.16635	0.2513		0.7487
1556667_at	LOC348751	hypothetical protein LOC348751	0.53806	-0.15095	-0.68901	0.00875	0.25	0.9913
1556941_a_at	LOC283484	hypothetical protein LOC283484	0.86437	0.81302	-0.051351	0.32775		0.67225
1557053_s_at	UBE2G2	ubiquitin-conjugating enzyme E2G 2 (UBC7 homolog, yeast)	0.67656	0.46249	-0.21407	0.1529		0.8471
1557071_s_at	NUB1	negative regulator of ubiquitin-like proteins 1	0.73688	0.60302	-0.13385	0.27735		0.72265
1557098_s_at	HAR1A	highly accelerated region 1A (non-protein coding)	0.66755	0.80153	0.13398	0.83275		0.16725
1557100_s_at	HECTD1	HECT domain containing 1	0.77159	0.051773	-0.71982	0.0464		0.9536
1557137_at	TMEM17	transmembrane protein 17	0.40468	0.83201	0.42732	0.94595		0.05405
1557166_at	PDCD4	programmed cell death 4 (neoplastic transformation inhibitor)	0.91269	0.37271	-0.53998	0.1843		0.8157
1557167_at	HCG11	HLA complex group 11	0.46147	0.82231	0.36083	0.99175		0.00825	0.25
1557169_x_at	HCG11	HLA complex group 11	0.43475	0.77115	0.3364	0.83045		0.16955
1557203_at	PABPC1L2B	poly(A) binding protein, cytoplasmic 1-like 2B	0.77144	0.52775	-0.24369	0.10695		0.89305
1557260_a_at	ZNF382	zinc finger protein 382	0.73069	0.44784	-0.28284	0.20335		0.79665
1557360_at	LRPPRC	leucine-rich PPR-motif containing	0.71679	0.7116	-0.0051927	0.5517		0.4483
1557384_at	ZNF131	zinc finger protein 131	0.68458	0.57033	-0.11426	0.31675		0.68325
1557481_a_at	C21ORF131	chromosome 21 open reading frame 131	0.46568	0.77875	0.31307	0.87065		0.12935
1557828_a_at	C5ORF28	chromosome 5 open reading frame 28	0.19683	0.71042	0.51359	0.88235		0.11765
1557954_at	CXORF15	chromosome X open reading frame 15	0.32264	0.70192	0.37928	0.96615		0.03385
1557996_at	MGC13098	polymerase (RNA) II (DNA directed) polypeptide J4, pseudogene	0.6485	0.81244	0.16394	0.78		0.22
1558077_s_at	MDH1B	malate dehydrogenase 1B, NAD (soluble)	0.87431	0.68556	-0.18875	0.08995		0.91005
1558078_at	MGC13098	polymerase (RNA) II (DNA directed) polypeptide J4, pseudogene	0.76518	0.84727	0.08209	0.82625		0.17375
1558117_s_at	USP31	ubiquitin specific peptidase 31	0.93183	0.89547	-0.036367	0.28175		0.71825
1558220_at	SDHAL2	succinate dehydrogenase complex, subunit A, flavoprotein pseudogene 2	0.73545	0.90952	0.17407	0.95535		0.04465
1558279_a_at	KDSR	3-ketodihydrosphingosine reductase	0.22751	0.75805	0.53055	0.96035		0.03965
1558292_s_at	PIGW	phosphatidylinositol glycan anchor biosynthesis, class W	0.074619	0.75675	0.68213	0.95095		0.04905
1558369_at	MPHOSPH9	M-phase phosphoprotein 9	0.68126	0.51469	-0.16657	0.2694		0.7306
1558511_s_at	FAM62B	family with sequence similarity 62 (C2 domain containing) member B	0.70549	0.54593	-0.15956	0.2738		0.7262
1558587_at	LOC728334	hypothetical LOC728334	0.87786	0.88704	0.0091825	0.58425		0.41575
1558755_x_at	ZNF763	zinc finger protein 763	0.80075	0.35623	-0.44452	0.0173		0.9827
1558761_a_at	FAM120AOS	family with sequence similarity 120A opposite strand	0.77065	0.23338	-0.53727	0.07305		0.92695
1558796_a_at	LOC728052	similar to hCG2031213	0.72529	0.56285	-0.16245	0.29475		0.70525
1558893_a_at	CCDC67	coiled-coil domain containing 67	0.67681	0.34451	-0.3323	0.07285		0.92715
1558943_x_at	ZNF765	zinc finger protein 765	0.77535	-0.029271	-0.80462	0.0094	0.3	0.9906
1558964_at	FAT3	FAT tumor suppressor homolog 3 (Drosophila)	0.10738	0.85604	0.74866	0.9431		0.0569
1559039_at	DHX36	DEAH (Asp-Glu-Ala-His) box polypeptide 36	0.78635	0.52976	-0.25659	0.2032		0.7968
1559256_at	MAGI1	membrane associated guanylate kinase, WW and PDZ domain containing 1	0.36868	0.86247	0.49379	0.9937		0.0063	0.25
1559257_a_at	MAGI1	membrane associated guanylate kinase, WW and PDZ domain containing 1	-0.0099609	0.90673	0.91669	0.989		0.011	0.3
1559413_at	TCP11L2	t-complex 11 (mouse)-like 2	-0.53494	0.68068	1.2156	0.9984		0.00975	0.3
1559490_at	LRCH3	leucine-rich repeats and calponin homology (CH) domain containing 3	0.13273	0.74651	0.61377	0.99075		0.00925	0.3
1559760_at	LOC401220	hypothetical gene supported by BC036933	0.71598	0.64789	-0.068093	0.3842		0.6158
1559954_s_at	DDX42	DEAD (Asp-Glu-Ala-Asp) box polypeptide 42	0.68753	0.35072	-0.33681	0.1113		0.8887
1559957_a_at	LOC642852	hypothetical LOC642852	0.87712	0.91276	0.035638	0.72745		0.27255
1560013_at	PDXDC1	pyridoxal-dependent decarboxylase domain containing 1	0.82422	-0.24343	-1.0676	0.05415		0.9459
1560119_at	LOC389634	hypothetical LOC389634	0.016601	0.73611	0.71951	0.97045		0.02955
1560128_x_at	LOC441108	hypothetical gene supported by AK128882	0.69292	0.5578	-0.13512	0.3687		0.6313
1560172_at	INTS10	integrator complex subunit 10	0.73875	0.4766	-0.26215	0.3232		0.6768
1560720_at	MKNK1	MAP kinase interacting serine/threonine kinase 1	-0.0043081	0.76228	0.76659	0.94785		0.05215
1560814_a_at	C15ORF57	chromosome 15 open reading frame 57	0.40198	0.70323	0.30126	0.87505		0.12495
1561687_a_at	ZNF382	zinc finger protein 382	0.78712	-0.071676	-0.8588	0.04325		0.95675
1562238_at	USPL1	ubiquitin specific peptidase like 1	0.23353	0.89367	0.66014	0.72155		0.27845
1562240_at	PLXNA4	plexin A4	0.094088	0.82679	0.7327	0.7427		0.2573
1562473_at	HLA-DRA	major histocompatibility complex, class II, DR alpha	0.71162	0.16878	-0.54284	0.06035		0.93965
1562681_at	LOC338651	hypothetical protein LOC338651	0.76044	0.13704	-0.62339	0.0294		0.9706
1563111_a_at	PIGX	phosphatidylinositol glycan anchor biosynthesis, class X	0.25068	0.76391	0.51323	0.92725		0.07275
1563471_at	KIAA1632	KIAA1632	0.29599	0.77154	0.47555	0.812		0.188
1563529_at	HYDIN2	hydrocephalus inducing homolog 2 (mouse)	-0.23211	0.71861	0.95072	0.98265		0.01735	0.3
1564166_s_at	PRKRIP1	PRKR interacting protein 1 (IL11 inducible)	0.90018	0.56378	-0.3364	0.1979		0.80245
1566079_at	LOC647190	similar to 40S ribosomal protein S16	0.67869	0.99898	0.32029	0.75565		0.24485
1566140_at	HOPX	HOP homeobox	0.021597	0.92231	0.90071	0.902		0.098
1566557_at	FLJ90757	hypothetical protein LOC440465	0.58347	0.70796	0.12449	0.66685		0.33315
1566624_at	DKFZP547J0410	DKFZP547J0410 protein	0.8146	0.23374	-0.58086	0.0831		0.9169
1568597_at	LOC646762	hypothetical LOC646762	0.77488	0.59333	-0.18155	0.3029		0.6971
1568612_at	GABRG2	gamma-aminobutyric acid (GABA) A receptor, gamma 2	0.44662	0.82038	0.37376	0.90985		0.09015
1568658_at	C2ORF74	chromosome 2 open reading frame 74	0.67198	0.8169	0.14492	0.76135		0.23865
1568720_at	ZNF506	zinc finger protein 506	0.40668	0.8591	0.45242	0.9786		0.0214	0.3
1568763_s_at	PDCD6	programmed cell death 6	0.87167	0.88109	0.0094219	0.54455		0.45545
1568765_at	SERPINE1	serpin peptidase inhibitor, clade E (nexin, plasminogen activator inhibitor type 1), member 1	0.92876	0.053808	-0.87495	0.0021	0.2	0.99845
1568780_at	LOC649305	hypothetical protein LOC649305	0.42619	0.82765	0.40146	0.871		0.129
1568933_at	LOC646627	phospholipase inhibitor	0.69073	0.53178	-0.15895	0.1837		0.8163
1568934_at	CX3CR1	chemokine (C-X3-C motif) receptor 1	0.64657	0.80151	0.15494	0.72015		0.27985
1568954_s_at	C16ORF72	chromosome 16 open reading frame 72	0.73657	0.43704	-0.29953	0.12675		0.87325
1569108_a_at	ZNF589	zinc finger protein 589	0.16607	0.7252	0.55913	0.9836		0.0164	0.3
1569872_a_at	LOC650392	hypothetical protein LOC650392	0.63611	0.7252	0.089098	0.5707		0.4293
1570534_a_at	ZNF483	zinc finger protein 483	0.72954	0.49519	-0.23435	0.1808		0.8192
200002_at	RPL35	ribosomal protein L35	0.05383	0.79534	0.74151	0.99545		0.00455	0.25
200012_x_at	RPL21(includesEG:6144)	ribosomal protein L21	0.1217	0.78704	0.66534	0.98955		0.01045	0.3
200014_s_at	HNRNPC	heterogeneous nuclear ribonucleoprotein C (C1/C2)	0.69164	0.76954	0.077902	0.67505		0.32495
200015_s_at	2009-09-02	septin 2	0.8173	0.31592	-0.50138	0.00785	0.25	0.99215
200040_at	KHDRBS1	KH domain containing, RNA binding, signal transduction associated 1	0.67105	0.75802	0.086971	0.6369		0.3631
200044_at	SFRS9	splicing factor, arginine/serine-rich 9	0.20939	0.75956	0.55017	0.9154		0.0846
200056_s_at	C1D	nuclear DNA-binding protein	0.36769	0.7268	0.35911	0.8642		0.1358
200077_s_at	OAZ1	ornithine decarboxylase antizyme 1	0.10152	0.72937	0.62785	0.96335		0.03665
200083_at	USP22	ubiquitin specific peptidase 22	0.035982	0.70543	0.66945	0.9791		0.0209	0.3
200088_x_at	RPL12(includesEG:6136)	ribosomal protein L12	0.47348	0.69166	0.21819	0.8631		0.1369
200089_s_at	RPL4	ribosomal protein L4	0.23576	0.6856	0.44984	0.9751		0.0249
200099_s_at	RPS3A	ribosomal protein S3A	0.72602	0.66569	-0.060332	0.39505		0.60495
200595_s_at	EIF3A	eukaryotic translation initiation factor 3, subunit A	0.22654	0.7176	0.49106	0.9701		0.0299
200599_s_at	HSP90B1	heat shock protein 90kDa beta (Grp94), member 1	0.75655	0.36906	-0.38749	0.0797		0.9203
200610_s_at	NCL	nucleolin	0.76403	0.67492	-0.089112	0.34305		0.65695
200629_at	WARS	tryptophanyl-tRNA synthetase	0.73729	0.38316	-0.35413	0.10305		0.89695
200647_x_at	EIF3C	eukaryotic translation initiation factor 3, subunit C	0.75316	0.67578	-0.077377	0.3807		0.6193
200658_s_at	PHB(includesEG:5245)	prohibitin	0.73834	0.19332	-0.54502	0.066		0.934
200664_s_at	DNAJB1	DnaJ (Hsp40) homolog, subfamily B, member 1	0.6987	0.98655	0.28785	0.7437		0.2563
200666_s_at	DNAJB1	DnaJ (Hsp40) homolog, subfamily B, member 1	0.61063	0.9879	0.37727	0.8555		0.1445
200668_s_at	UBE2D3	ubiquitin-conjugating enzyme E2D 3 (UBC4/5 homolog, yeast)	0.73488	0.54855	-0.18633	0.2545		0.7455
200693_at	YWHAQ(includesEG:10971)	tyrosine 3-monooxygenase/tryptophan 5-monooxygenase activation protein, theta polypeptide	0.79274	0.56366	-0.22908	0.139		0.861
200703_at	DYNLL1	dynein, light chain, LC8-type 1	0.55878	0.72303	0.16425	0.60565		0.39435
200718_s_at	SKP1	S-phase kinase-associated protein 1	0.59499	0.71582	0.12083	0.6461		0.3539
200726_at	PPP1CC	protein phosphatase 1, catalytic subunit, gamma isoform	0.7341	0.23329	-0.50081	0.06305		0.93695
200729_s_at	ACTR2	ARP2 actin-related protein 2 homolog (yeast)	0.7365	0.73471	-0.0017934	0.482		0.518
200731_s_at	PTP4A1	protein tyrosine phosphatase type IVA, member 1	0.70659	0.45496	-0.25162	0.1624		0.8376
200737_at	PGK1	phosphoglycerate kinase 1	0.72026	0.7501	0.029847	0.4967		0.5033
200738_s_at	PGK1	phosphoglycerate kinase 1	0.50968	0.75841	0.24873	0.72535		0.27465
200747_s_at	NUMA1	nuclear mitotic apparatus protein 1	0.76708	0.21127	-0.55581	0.1018		0.8982
200749_at	RAN	RAN, member RAS oncogene family	0.49616	0.7448	0.24864	0.7317		0.2683
200750_s_at	RAN	RAN, member RAS oncogene family	0.67672	0.73607	0.059354	0.5448		0.4552
200764_s_at	CTNNA1	catenin (cadherin-associated protein), alpha 1, 102kDa	0.76696	-0.19517	-0.96212	0.0018	0.2	0.9982
200778_s_at	2009-09-02	septin 2	0.75431	0.41615	-0.33816	0.05265		0.94735
200779_at	ATF4	activating transcription factor 4 (tax-responsive enhancer element B67)	0.60648	0.74626	0.13978	0.7713		0.2287
200782_at	ANXA5	annexin A5	0.67762	0.27131	-0.40631	0.05915		0.94085
200783_s_at	STMN1	stathmin 1/oncoprotein 18	0.30991	0.79276	0.48286	0.81145		0.18855
200790_at	ODC1	ornithine decarboxylase 1	0.30124	0.68952	0.38828	0.93495		0.06505
200797_s_at	MCL1	myeloid cell leukemia sequence 1 (BCL2-related)	0.77297	0.77692	0.0039523	0.5117		0.4883
200798_x_at	MCL1	myeloid cell leukemia sequence 1 (BCL2-related)	0.62151	0.74075	0.11924	0.55		0.45
200799_at	HSPA1A	heat shock 70kDa protein 1A	0.82429	0.9627	0.1384	0.7133		0.2867
200800_s_at	HSPA1A	heat shock 70kDa protein 1A	0.87334	0.99358	0.12023	0.6644		0.3356
200806_s_at	HSPD1	heat shock 60kDa protein 1 (chaperonin)	0.73643	0.69272	-0.043705	0.41985		0.58015
200807_s_at	HSPD1	heat shock 60kDa protein 1 (chaperonin)	0.47988	0.8224	0.34252	0.89615		0.10385
200809_x_at	RPL12(includesEG:6136)	ribosomal protein L12	0.44461	0.64961	0.205	0.9469		0.0531
200811_at	CIRBP	cold inducible RNA binding protein	0.74697	0.6871	-0.059862	0.36885		0.63115
200813_s_at	PAFAH1B1	platelet-activating factor acetylhydrolase, isoform Ib, alpha subunit 45kDa	0.84685	0.63723	-0.20962	0.12295		0.87705
200816_s_at	PAFAH1B1	platelet-activating factor acetylhydrolase, isoform Ib, alpha subunit 45kDa	0.37278	0.73921	0.36643	0.81775		0.18225
200818_at	ATP5O	ATP synthase, H+ transporting, mitochondrial F1 complex, O subunit	0.55837	0.68133	0.12296	0.64895		0.35105
200832_s_at	SCD	stearoyl-CoA desaturase (delta-9-desaturase)	0.054893	0.73195	0.67705	0.9983		0.0017	0.2
200838_at	CTSB	cathepsin B	0.80371	0.32341	-0.4803	0.0439		0.9561
200847_s_at	TMEM66	transmembrane protein 66	0.17257	0.72964	0.55707	0.91585		0.08415
200850_s_at	AHCYL1	S-adenosylhomocysteine hydrolase-like 1	0.7127	0.49151	-0.22119	0.1826		0.8174
200853_at	H2AFZ	H2A histone family, member Z	0.57142	0.84012	0.2687	0.73295		0.26705
200866_s_at	PSAP	prosaposin	0.79523	0.49566	-0.29957	0.15235		0.84765
200880_at	DNAJA1	DnaJ (Hsp40) homolog, subfamily A, member 1	0.7398	0.75013	0.010323	0.49265		0.50735
200881_s_at	DNAJA1	DnaJ (Hsp40) homolog, subfamily A, member 1	0.71586	0.77545	0.059589	0.6014		0.3986
200886_s_at	PGAM1	phosphoglycerate mutase 1 (brain)	0.59459	0.75674	0.16215	0.6338		0.3662
200892_s_at	SFRS10	splicing factor, arginine/serine-rich 10 (transformer 2 homolog, Drosophila)	0.812	0.37929	-0.43271	0.061		0.939
200897_s_at	PALLD	palladin, cytoskeletal associated protein	0.73727	0.43167	-0.30559	0.1447		0.8553
200937_s_at	RPL5(includesEG:6125)	ribosomal protein L5	0.80329	0.55321	-0.25007	0.252		0.748
200943_at	HMGN1	high-mobility group nucleosome binding domain 1	0.67544	0.12432	-0.55112	0.02715		0.97285
200954_at	ATP6V0C	ATPase, H+ transporting, lysosomal 16kDa, V0 subunit c	0.5283	0.7677	0.2394	0.6546		0.3454
200961_at	SEPHS2	selenophosphate synthetase 2	0.67094	0.79039	0.11945	0.6053		0.3947
200962_at	RPL31	ribosomal protein L31	0.80289	0.91157	0.10867	0.8561		0.1439
200975_at	PPT1	palmitoyl-protein thioesterase 1	0.4818	0.76873	0.28693	0.98375		0.01625	0.3
200978_at	MDH1	malate dehydrogenase 1, NAD (soluble)	0.080941	0.72208	0.64114	0.89515		0.10485
200983_x_at	CD59	CD59 molecule, complement regulatory protein	0.61302	0.71643	0.10341	0.69325		0.30675
200984_s_at	CD59	CD59 molecule, complement regulatory protein	0.59815	0.77438	0.17623	0.82225		0.17775
200985_s_at	CD59	CD59 molecule, complement regulatory protein	0.31954	0.82358	0.50404	0.9954		0.0046	0.25
200989_at	HIF1A	hypoxia inducible factor 1, alpha subunit (basic helix-loop-helix transcription factor)	0.7377	0.67124	-0.066462	0.43775		0.56225
200992_at	IPO7	importin 7	0.68991	0.67213	-0.017772	0.47685		0.52315
200993_at	IPO7	importin 7	0.69481	0.64883	-0.045979	0.38225		0.61775
201002_s_at	UBE2V1	ubiquitin-conjugating enzyme E2 variant 1	0.29985	0.70683	0.40698	0.8422		0.1578
201009_s_at	TXNIP	thioredoxin interacting protein	0.54201	0.71369	0.17168	0.7519		0.2481
201010_s_at	TXNIP	thioredoxin interacting protein	0.74549	0.82152	0.076029	0.6922		0.3078
201017_at	EIF1AX	eukaryotic translation initiation factor 1A, X-linked	0.76078	0.83856	0.077781	0.741		0.259
201022_s_at	DSTN	destrin (actin depolymerizing factor)	0.6883	0.83974	0.15144	0.6481		0.3519
201039_s_at	RAD23A	RAD23 homolog A (S. cerevisiae)	-0.44101	0.72103	1.162	0.9993		0.0007	0.15
201041_s_at	DUSP1	dual specificity phosphatase 1	0.87101	0.93105	0.060047	0.62015		0.37985
201047_x_at	RAB6A	RAB6A, member RAS oncogene family	0.1797	0.70282	0.52312	0.8628		0.1372
201049_s_at	RPS18	ribosomal protein S18	-0.20783	0.6876	0.89543	1		5e-05	0.05
201054_at	HNRNPA0	heterogeneous nuclear ribonucleoprotein A0	0.66669	0.81209	0.1454	0.66815		0.33185
201077_s_at	NHP2L1	NHP2 non-histone chromosome protein 2-like 1 (S. cerevisiae)	0.51197	0.82865	0.31668	0.8624		0.1376
201078_at	TM9SF2	transmembrane 9 superfamily member 2	0.68818	0.46802	-0.22016	0.2647		0.7353
201119_s_at	COX8A	cytochrome c oxidase subunit 8A (ubiquitous)	0.62409	0.8648	0.24071	0.93955		0.06045
201122_x_at	EIF5A	eukaryotic translation initiation factor 5A	0.80943	0.79032	-0.019113	0.4217		0.5783
201123_s_at	EIF5A	eukaryotic translation initiation factor 5A	0.87791	0.82291	-0.055006	0.31835		0.68165
201129_at	SFRS7	splicing factor, arginine/serine-rich 7, 35kDa	0.49074	0.73342	0.24267	0.8271		0.1729
201134_x_at	COX7C(includesEG:1350)	cytochrome c oxidase subunit VIIc	0.17629	0.76391	0.58762	0.89155		0.10845
201137_s_at	HLA-DPB1	major histocompatibility complex, class II, DP beta 1	0.78282	0.72621	-0.056608	0.3488		0.6512
201141_at	GPNMB	glycoprotein (transmembrane) nmb	0.94661	0.74404	-0.20257	0.00855	0.25	0.99145
201143_s_at	EIF2S1	eukaryotic translation initiation factor 2, subunit 1 alpha, 35kDa	0.65538	0.77197	0.11659	0.8491		0.1509
201146_at	NFE2L2	nuclear factor (erythroid-derived 2)-like 2	0.70652	0.10163	-0.60489	0.0014	0.2	0.9986
201153_s_at	MBNL1	muscleblind-like (Drosophila)	0.631	0.80481	0.17381	0.833		0.167
201160_s_at	CSDA	cold shock domain protein A	0.98092	0.33762	-0.6433	0.0863		0.9137
201162_at	IGFBP7	insulin-like growth factor binding protein 7	0.77183	0.73935	-0.03248	0.41285		0.58715
201166_s_at	PUM1	pumilio homolog 1 (Drosophila)	0.11732	0.81894	0.70162	0.9976		0.0024	0.2
201190_s_at	PITPNA	phosphatidylinositol transfer protein, alpha	0.57141	0.75927	0.18786	0.69225		0.30775
201193_at	IDH1	isocitrate dehydrogenase 1 (NADP+), soluble	0.17828	0.72515	0.54686	0.9781		0.0219	0.3
201194_at	SEPW1	selenoprotein W, 1	-0.062785	0.71338	0.77617	0.9963		0.0037	0.25
201202_at	PCNA	proliferating cell nuclear antigen	0.69584	0.28204	-0.4138	0.0486		0.9514
201212_at	LGMN	legumain	0.43053	0.82351	0.39298	0.8889		0.1111
201216_at	ERP29	endoplasmic reticulum protein 29	0.74417	0.77519	0.031022	0.52355		0.47645
201224_s_at	SRRM1	serine/arginine repetitive matrix 1	0.70545	0.75529	0.049842	0.5494		0.4506
201232_s_at	PSMD13	proteasome (prosome, macropain) 26S subunit, non-ATPase, 13	0.71388	0.67893	-0.034944	0.4536		0.5464
201236_s_at	BTG2	BTG family, member 2	0.93698	0.97872	0.041743	0.6608		0.3392
201237_at	CAPZA2	capping protein (actin filament) muscle Z-line, alpha 2	0.48999	0.75068	0.26069	0.76125		0.23875
201238_s_at	CAPZA2	capping protein (actin filament) muscle Z-line, alpha 2	0.54598	0.69203	0.14605	0.69345		0.30655
201250_s_at	SLC2A1	solute carrier family 2 (facilitated glucose transporter), member 1	0.78463	0.46107	-0.32357	0.1392		0.8608
201266_at	TXNRD1	thioredoxin reductase 1	0.49923	0.71093	0.2117	0.7155		0.2845
201268_at	NME2	non-metastatic cells 2, protein (NM23B) expressed in	0.75529	0.55303	-0.20226	0.2187		0.7813
201272_at	AKR1B1	aldo-keto reductase family 1, member B1 (aldose reductase)	0.6964	0.55503	-0.14137	0.29375		0.70625
201280_s_at	DAB2	disabled homolog 2, mitogen-responsive phosphoprotein (Drosophila)	0.8014	0.70518	-0.096215	0.385		0.615
201288_at	ARHGDIB	Rho GDP dissociation inhibitor (GDI) beta	0.74246	0.55399	-0.18847	0.2085		0.7915
201289_at	CYR61	cysteine-rich, angiogenic inducer, 61	0.8744	0.97906	0.10466	0.69955		0.30045
201298_s_at	MOBKL1B	MOB1, Mps One Binder kinase activator-like 1B (yeast)	0.75593	0.58244	-0.17349	0.27155		0.72845
201307_at	2009-09-11	septin 11	0.72142	0.59929	-0.12214	0.37475		0.62525
201315_x_at	IFITM2	interferon induced transmembrane protein 2 (1-8D)	0.74843	0.80636	0.057935	0.5276		0.4724
201317_s_at	PSMA2	proteasome (prosome, macropain) subunit, alpha type, 2	0.69538	0.59522	-0.10015	0.33785		0.66215
201324_at	EMP1	epithelial membrane protein 1	0.99848	0.90354	-0.094941	0.25195		0.74805
201325_s_at	EMP1	epithelial membrane protein 1	0.97403	0.56735	-0.40668	0.14945		0.85055
201327_s_at	CCT6A	chaperonin containing TCP1, subunit 6A (zeta 1)	0.58439	0.80306	0.21867	0.6913		0.3087
201330_at	RARS	arginyl-tRNA synthetase	0.7485	0.56526	-0.18325	0.2544		0.7456
201338_x_at	GTF3A	general transcription factor IIIA	0.42404	0.8092	0.38515	0.97295		0.02705
201343_at	UBE2D2	ubiquitin-conjugating enzyme E2D 2 (UBC4/5 homolog, yeast)	0.46563	0.80234	0.33672	0.87035		0.12965
201344_at	UBE2D2	ubiquitin-conjugating enzyme E2D 2 (UBC4/5 homolog, yeast)	0.55804	0.7694	0.21136	0.71325		0.28675
201346_at	ADIPOR2	adiponectin receptor 2	0.73018	0.17023	-0.55995	0.06615		0.93385
201368_at	ZFP36L2	zinc finger protein 36, C3H type-like 2	0.88484	0.61659	-0.26825	0.02135		0.97865
201386_s_at	DHX15	DEAH (Asp-Glu-Ala-His) box polypeptide 15	0.7119	0.45345	-0.25845	0.0838		0.9162
201411_s_at	PLEKHB2	pleckstrin homology domain containing, family B (evectins) member 2	0.79788	0.5823	-0.21558	0.162		0.838
201417_at	SOX4	SRY (sex determining region Y)-box 4	0.26363	0.69727	0.43365	0.9805		0.0195	0.3
201420_s_at	WDR77	WD repeat domain 77	0.15687	0.83994	0.68307	0.9984		0.0016	0.2
201423_s_at	CUL4A	cullin 4A	0.73824	0.59648	-0.14176	0.29415		0.70585
201460_at	MAPKAPK2	mitogen-activated protein kinase-activated protein kinase 2	0.72184	0.68477	-0.037072	0.4712		0.5288
201464_x_at	JUN	jun oncogene	0.60497	0.85359	0.24863	0.81135		0.18865
201466_s_at	JUN	jun oncogene	0.69453	0.71307	0.01854	0.5138		0.4862
201471_s_at	SQSTM1	sequestosome 1	0.0028378	0.78371	0.78087	0.9966		0.0034	0.25
201473_at	JUNB	jun B proto-oncogene	0.85012	0.90201	0.051889	0.5754		0.4246
201484_at	SUPT4H1	suppressor of Ty 4 homolog 1 (S. cerevisiae)	0.37813	0.71315	0.33501	0.97085		0.02915
201492_s_at	RPL41	ribosomal protein L41	0.25056	0.73381	0.48325	0.9492		0.0508
201493_s_at	PUM2	pumilio homolog 2 (Drosophila)	0.69847	0.51682	-0.18164	0.31515		0.68485
201494_at	PRCP	prolylcarboxypeptidase (angiotensinase C)	0.72385	0.39383	-0.33002	0.08685		0.91315
201502_s_at	NFKBIA	nuclear factor of kappa light polypeptide gene enhancer in B-cells inhibitor, alpha	0.93121	0.80934	-0.12187	0.11745		0.88255
201525_at	APOD	apolipoprotein D	0.65872	0.79314	0.13442	0.68415		0.31585
201528_at	RPA1	replication protein A1, 70kDa	0.74151	0.010485	-0.73103	0.0081	0.25	0.9919
201531_at	ZFP36	zinc finger protein 36, C3H type, homolog (mouse)	0.90934	0.78467	-0.12467	0.2586		0.7414
201542_at	SAR1A	SAR1 homolog A (S. cerevisiae)	0.6217	0.7521	0.1304	0.82325		0.17675
201543_s_at	SAR1A	SAR1 homolog A (S. cerevisiae)	0.3545	0.71582	0.36132	0.8617		0.1383
201568_at	UQCRQ	ubiquinol-cytochrome c reductase, complex III subunit VII, 9.5kDa	0.26188	0.71815	0.45627	0.82315		0.17685
201572_x_at	DCTD	dCMP deaminase	0.71201	0.72494	0.012924	0.5297		0.4703
201581_at	TXNDC13	thioredoxin domain containing 13	0.38025	0.74003	0.35978	0.9234		0.0766
201582_at	SEC23B	Sec23 homolog B (S. cerevisiae)	0.74559	0.37717	-0.36842	0.149		0.851
201601_x_at	IFITM1	interferon induced transmembrane protein 1 (9-27)	0.70105	0.76039	0.059332	0.52445		0.47555
201607_at	PWP1	PWP1 homolog (S. cerevisiae)	0.72872	0.77978	0.051064	0.59505		0.40495
201626_at	INSIG1	insulin induced gene 1	0.41241	0.85316	0.44075	0.99475		0.00525	0.25
201627_s_at	INSIG1	insulin induced gene 1	0.74182	0.5372	-0.20462	0.1917		0.8083
201630_s_at	ACP1	acid phosphatase 1, soluble	0.31906	0.83043	0.51137	0.88295		0.11705
201631_s_at	IER3	immediate early response 3	0.69507	0.88525	0.19018	0.68025		0.31975
201632_at	EIF2B1	eukaryotic translation initiation factor 2B, subunit 1 alpha, 26kDa	0.76197	0.29577	-0.4662	0.1966		0.8034
201660_at	ACSL3	acyl-CoA synthetase long-chain family member 3	0.26502	0.76472	0.4997	0.98525		0.01475	0.3
201666_at	TIMP1	TIMP metallopeptidase inhibitor 1	0.71326	0.037456	-0.6758	0.1637		0.8363
201680_x_at	ARS2	arsenate resistance protein 2	0.7096	0.48666	-0.22294	0.22395		0.77605
201693_s_at	EGR1	early growth response 1	0.78419	0.88858	0.10439	0.6861		0.3139
201694_s_at	EGR1	early growth response 1	0.74969	0.6295	-0.12019	0.28155		0.71845
201695_s_at	NP	nucleoside phosphorylase	0.80044	0.39381	-0.40663	0.23545		0.76455
201703_s_at	PPP1R10	protein phosphatase 1, regulatory (inhibitor) subunit 10	0.83349	0.074493	-0.75899	0.00415	0.2	0.99585
201705_at	PSMD7	proteasome (prosome, macropain) 26S subunit, non-ATPase, 7	0.56597	0.71279	0.14681	0.68665		0.31335
201721_s_at	LAPTM5	lysosomal multispanning membrane protein 5	0.7994	0.89256	0.093157	0.8093		0.1907
201725_at	CDC123	cell division cycle 123 homolog (S. cerevisiae)	0.53181	0.71615	0.18434	0.6814		0.3186
201737_s_at	2009-03-06	membrane-associated ring finger (C3HC4) 6	0.72881	-0.053205	-0.78201	0.00775	0.25	0.99225
201739_at	SGK1	serum/glucocorticoid regulated kinase 1	0.93259	0.768	-0.16459	0.09145		0.90855
201756_at	RPA2	replication protein A2, 32kDa	0.51971	0.72273	0.20303	0.77985		0.22015
201760_s_at	WSB2	WD repeat and SOCS box-containing 2	0.20346	0.7027	0.49924	0.97155		0.02845
201761_at	MTHFD2(includesEG:10797)	methylenetetrahydrofolate dehydrogenase (NADP+ dependent) 2, methenyltetrahydrofolate cyclohydrolase	0.96633	0.25033	-0.716	0.0363		0.9637
201762_s_at	PSME2	proteasome (prosome, macropain) activator subunit 2 (PA28 beta)	0.40595	0.72522	0.31926	0.73135		0.26865
201764_at	TMEM106C	transmembrane protein 106C	0.35616	0.81754	0.46137	0.9955		0.0045	0.25
201778_s_at	KIAA0494	KIAA0494	0.68413	0.32235	-0.36179	0.0387		0.9613
201792_at	AEBP1	AE binding protein 1	0.79921	0.17573	-0.62348	0.0658		0.9342
201826_s_at	SCCPDH	saccharopine dehydrogenase (putative)	0.75559	0.501	-0.25458	0.166		0.834
201848_s_at	BNIP3(includesEG:664)	BCL2/adenovirus E1B 19kDa interacting protein 3	0.27695	0.81877	0.54182	0.96145		0.03855
201854_s_at	ATMIN	ATM interactor	0.72387	0.62348	-0.1004	0.4355		0.5645
201858_s_at	SRGN	serglycin	0.64524	0.68573	0.040484	0.42555		0.57445
201859_at	SRGN	serglycin	0.59479	0.76626	0.17146	0.53515		0.46485
201860_s_at	PLAT	plasminogen activator, tissue	0.68401	0.47058	-0.21342	0.18795		0.81205
201889_at	FAM3C	family with sequence similarity 3, member C	0.28755	0.69968	0.41213	0.938		0.062
201896_s_at	PSRC1	proline/serine-rich coiled-coil 1	0.77153	0.44072	-0.33081	0.0427		0.9573
201897_s_at	CKS1B	CDC28 protein kinase regulatory subunit 1B	0.28456	0.74319	0.45864	0.933		0.067
201911_s_at	FARP1	FERM, RhoGEF (ARHGEF) and pleckstrin domain protein 1 (chondrocyte-derived)	0.72959	0.51077	-0.21882	0.13095		0.86905
201916_s_at	SEC63	SEC63 homolog (S. cerevisiae)	0.41777	0.68638	0.26861	0.9346		0.0654
201922_at	TINP1	TGF beta-inducible nuclear protein 1	0.72555	0.93049	0.20495	0.9235		0.0765
201923_at	PRDX4	peroxiredoxin 4	0.73283	0.64914	-0.083696	0.3446		0.6554
201924_at	AFF1	AF4/FMR2 family, member 1	0.70846	0.74883	0.040376	0.5871		0.4129
201925_s_at	CD55	CD55 molecule, decay accelerating factor for complement (Cromer blood group)	0.3571	0.74074	0.38364	0.93815		0.06185
201926_s_at	CD55	CD55 molecule, decay accelerating factor for complement (Cromer blood group)	0.70302	0.28888	-0.41414	0.11395		0.88605
201927_s_at	PKP4	plakophilin 4	0.71198	0.21912	-0.49286	0.34505		0.65495
201928_at	PKP4	plakophilin 4	0.71585	0.72571	0.0098577	0.5274		0.4726
201929_s_at	PKP4	plakophilin 4	0.68263	0.77637	0.093746	0.6221		0.3779
201947_s_at	CCT2	chaperonin containing TCP1, subunit 2 (beta)	0.16481	0.75166	0.58685	0.85615		0.14385
201951_at	ALCAM	activated leukocyte cell adhesion molecule	0.14513	0.77688	0.63175	0.994		0.006	0.25
201955_at	CCNC	cyclin C	0.42449	0.68606	0.26157	0.8103		0.1897
201968_s_at	PGM1	phosphoglucomutase 1	0.69707	0.6007	-0.096361	0.3125		0.6875
201972_at	ATP6V1A	ATPase, H+ transporting, lysosomal 70kDa, V1 subunit A	0.24603	0.8225	0.57648	0.79155		0.20845
201983_s_at	EGFR	epidermal growth factor receptor (erythroblastic leukemia viral (v-erb-b) oncogene homolog, avian)	0.53159	0.7227	0.1911	0.8332		0.1668
201988_s_at	CREBL2	cAMP responsive element binding protein-like 2	0.77496	0.7401	-0.034861	0.4032		0.5968
201990_s_at	CREBL2	cAMP responsive element binding protein-like 2	0.49549	0.72491	0.22943	0.80815		0.19185
201993_x_at	HNRPDL	heterogeneous nuclear ribonucleoprotein D-like	0.77511	-0.45685	-1.232	0.00045	0.15	0.99955
201994_at	MORF4L2	mortality factor 4 like 2	-0.13259	0.69636	0.82895	0.97155		0.02845
201998_at	ST6GAL1	ST6 beta-galactosamide alpha-2,6-sialyltranferase 1	0.71385	0.58557	-0.12828	0.2501		0.7499
202011_at	TJP1	tight junction protein 1 (zona occludens 1)	0.73687	0.38965	-0.34722	0.0994		0.9006
202013_s_at	EXT2	exostoses (multiple) 2	0.70852	0.062197	-0.64632	0.0511		0.9489
202016_at	MEST	mesoderm specific transcript homolog (mouse)	-0.024178	0.86223	0.88641	0.9825		0.0175	0.3
202020_s_at	LANCL1	LanC lantibiotic synthetase component C-like 1 (bacterial)	0.55228	0.74187	0.18959	0.8723		0.1277
202022_at	ALDOC	aldolase C, fructose-bisphosphate	0.25594	0.72794	0.472	0.89135		0.10865
202023_at	EFNA1	ephrin-A1	0.88615	0.031489	-0.85466	0.1464		0.8536
202024_at	ASNA1	arsA arsenite transporter, ATP-binding, homolog 1 (bacterial)	0.13941	0.7947	0.65529	0.95275		0.04725
202060_at	CTR9	Ctr9, Paf1/RNA polymerase II complex component, homolog (S. cerevisiae)	0.3365	0.71743	0.38093	0.87005		0.12995
202061_s_at	SEL1L	sel-1 suppressor of lin-12-like (C. elegans)	0.70243	0.49783	-0.2046	0.1881		0.8119
202071_at	SDC4	syndecan 4	0.81754	0.65646	-0.16108	0.22895		0.77105
202072_at	HNRNPL	heterogeneous nuclear ribonucleoprotein L	0.69982	0.53739	-0.16244	0.30165		0.69835
202077_at	NDUFAB1	NADH dehydrogenase (ubiquinone) 1, alpha/beta subcomplex, 1, 8kDa	0.41952	0.78596	0.36644	0.79295		0.20705
202081_at	IER2	immediate early response 2	0.89263	0.92123	0.028602	0.63125		0.36875
202086_at	MX1	myxovirus (influenza virus) resistance 1, interferon-inducible protein p78 (mouse)	0.77248	0.51071	-0.26177	0.20795		0.79205
202090_s_at	UQCR	ubiquinol-cytochrome c reductase, 6.4kDa subunit	0.56105	0.70591	0.14486	0.73215		0.26785
202110_at	COX7B	cytochrome c oxidase subunit VIIb	0.56149	0.75135	0.18986	0.7476		0.2524
202121_s_at	CHMP2A	chromatin modifying protein 2A	0.68828	0.43002	-0.25826	0.1457		0.8543
202139_at	AKR7A2	aldo-keto reductase family 7, member A2 (aflatoxin aldehyde reductase)	0.69457	0.44282	-0.25175	0.0942		0.9058
202149_at	NEDD9	neural precursor cell expressed, developmentally down-regulated 9	0.78555	0.59135	-0.19421	0.15705		0.84295
202165_at	PPP1R2	protein phosphatase 1, regulatory (inhibitor) subunit 2	0.63399	0.77384	0.13985	0.69515		0.30485
202168_at	TAF9	TAF9 RNA polymerase II, TATA box binding protein (TBP)-associated factor, 32kDa	0.33214	0.70787	0.37573	0.76155		0.23845
202193_at	LIMK2	LIM domain kinase 2	0.76072	0.069415	-0.69131	0.0382		0.9618
202196_s_at	DKK3	dickkopf homolog 3 (Xenopus laevis)	0.41536	0.72864	0.31329	0.876		0.124
202201_at	BLVRB	biliverdin reductase B (flavin reductase (NADPH))	0.52588	0.70194	0.17606	0.75355		0.24645
202203_s_at	AMFR	autocrine motility factor receptor	0.79062	0.94023	0.14961	0.9826		0.0174	0.3
202207_at	ARL4C	ADP-ribosylation factor-like 4C	0.67657	0.86736	0.1908	0.8617		0.1383
202208_s_at	ARL4C	ADP-ribosylation factor-like 4C	0.68371	0.54431	-0.13939	0.2436		0.7564
202217_at	C21ORF33	chromosome 21 open reading frame 33	0.75402	0.76734	0.013328	0.55265		0.44735
202233_s_at	UQCRH	ubiquinol-cytochrome c reductase hinge protein	0.76756	0.7437	-0.023859	0.4176		0.5824
202236_s_at	SLC16A1	solute carrier family 16, member 1 (monocarboxylic acid transporter 1)	0.90084	0.19534	-0.7055	0.01845		0.98155
202241_at	TRIB1	tribbles homolog 1 (Drosophila)	0.88013	0.46891	-0.41122	0.01645		0.98355
202244_at	PSMB4	proteasome (prosome, macropain) subunit, beta type, 4	-0.061552	0.77455	0.8361	0.9986		0.0014	0.2
202255_s_at	SIPA1L1	signal-induced proliferation-associated 1 like 1	0.18668	0.71619	0.5295	0.8684		0.1316
202259_s_at	N4BP2L2	NEDD4 binding protein 2-like 2	0.73316	0.76132	0.028162	0.5367		0.4633
202265_at	BMI1	BMI1 polycomb ring finger oncogene	0.70892	0.46826	-0.24066	0.21785		0.78215
202269_x_at	GBP1(includesEG:2633)	guanylate binding protein 1, interferon-inducible, 67kDa	0.89573	0.82157	-0.074165	0.3026		0.6974
202270_at	GBP1(includesEG:2633)	guanylate binding protein 1, interferon-inducible, 67kDa	0.80552	0.80963	0.0041042	0.43275		0.56725
202277_at	SPTLC1	serine palmitoyltransferase, long chain base subunit 1	0.19672	0.69756	0.50084	0.99405		0.00595	0.25
202279_at	C14ORF2	chromosome 14 open reading frame 2	0.30624	0.70484	0.3986	0.8222		0.1778
202284_s_at	CDKN1A	cyclin-dependent kinase inhibitor 1A (p21, Cip1)	0.9168	0.88185	-0.034946	0.38185		0.61815
202288_at	FRAP1	FK506 binding protein 12-rapamycin associated protein 1	0.89217	0.31636	-0.57581	0.01225	0.3	0.98775
202289_s_at	TACC2	transforming, acidic coiled-coil containing protein 2	0.21209	0.77922	0.56713	0.98695		0.01305	0.3
202295_s_at	CTSH	cathepsin H	0.86387	0.55829	-0.30558	0.02125		0.97875
202298_at	NDUFA1	NADH dehydrogenase (ubiquinone) 1 alpha subcomplex, 1, 7.5kDa	0.69064	0.79219	0.10155	0.58915		0.41085
202299_s_at	HBXIP	hepatitis B virus x interacting protein	0.72593	0.75099	0.025052	0.5113		0.4887
202300_at	HBXIP	hepatitis B virus x interacting protein	0.86787	0.75052	-0.11735	0.2662		0.7338
202319_at	SENP6	SUMO1/sentrin specific peptidase 6	0.76567	0.57396	-0.19171	0.18475		0.81525
202323_s_at	ACBD3	acyl-Coenzyme A binding domain containing 3	0.92448	0.81297	-0.11151	0.07405		0.92595
202325_s_at	ATP5J	ATP synthase, H+ transporting, mitochondrial F0 complex, subunit F6	0.68493	0.69796	0.013033	0.5077		0.4923
202331_at	BCKDHA	branched chain keto acid dehydrogenase E1, alpha polypeptide	0.69004	0.0057075	-0.68434	0.02615		0.97385
202340_x_at	NR4A1	nuclear receptor subfamily 4, group A, member 1	0.90825	0.98365	0.075399	0.7106		0.2894
202364_at	MXI1	MAX interactor 1	0.68826	0.86335	0.17509	0.79985		0.20015
202378_s_at	LEPROT	leptin receptor overlapping transcript	0.69828	0.44854	-0.24974	0.18975		0.81025
202379_s_at	NKTR	natural killer-tumor recognition sequence	0.51217	0.90607	0.3939	0.9541		0.0459
202388_at	RGS2	regulator of G-protein signaling 2, 24kDa	0.63606	0.84989	0.21383	0.76175		0.23825
202393_s_at	KLF10	Kruppel-like factor 10	0.27439	0.71331	0.43892	0.94845		0.05155
202411_at	IFI27	interferon, alpha-inducible protein 27	0.71812	0.30872	-0.4094	0.046		0.954
202415_s_at	HSPBP1	HSPA (heat shock 70kDa) binding protein, cytoplasmic cochaperone 1	0.57372	0.67588	0.10216	0.69405		0.30595
202416_at	DNAJC7	DnaJ (Hsp40) homolog, subfamily C, member 7	0.2199	0.76509	0.54519	0.95995		0.04005
202427_s_at	BRP44	brain protein 44	0.63558	0.84932	0.21375	0.7556		0.2444
202430_s_at	PLSCR1	phospholipid scramblase 1	0.92506	0.21507	-0.70999	0.0843		0.9157
202433_at	SLC35B1	solute carrier family 35, member B1	0.30926	0.72502	0.41576	0.8464		0.1536
202446_s_at	PLSCR1	phospholipid scramblase 1	0.88287	0.53921	-0.34366	0.2241		0.7759
202449_s_at	RXRA	retinoid X receptor, alpha	0.84751	0.46136	-0.38616	0.03075		0.96925
202458_at	PRSS23	protease, serine, 23	0.72934	0.30025	-0.42909	0.09055		0.90945
202461_at	EIF2B2	eukaryotic translation initiation factor 2B, subunit 2 beta, 39kDa	0.68903	0.67509	-0.013945	0.4397		0.5603
202464_s_at	PFKFB3	6-phosphofructo-2-kinase/fructose-2,6-biphosphatase 3	0.81829	0.55298	-0.26531	0.18895		0.81105
202478_at	TRIB2	tribbles homolog 2 (Drosophila)	0.74106	0.51434	-0.22673	0.27275		0.72725
202479_s_at	TRIB2	tribbles homolog 2 (Drosophila)	0.53928	0.73933	0.20005	0.85745		0.14255
202481_at	DHRS3	dehydrogenase/reductase (SDR family) member 3	0.70662	0.53334	-0.17328	0.28925		0.71075
202491_s_at	IKBKAP	inhibitor of kappa light polypeptide gene enhancer in B-cells, kinase complex-associated protein	0.53527	0.75255	0.21728	0.8188		0.1812
202498_s_at	SLC2A3	solute carrier family 2 (facilitated glucose transporter), member 3	0.77192	0.63668	-0.13524	0.22795		0.77205
202507_s_at	SNAP25	synaptosomal-associated protein, 25kDa	0.14141	0.7525	0.61109	0.9272		0.0728
202511_s_at	ATG5	ATG5 autophagy related 5 homolog (S. cerevisiae)	0.44128	0.79066	0.34938	0.9079		0.0921
202519_at	MLXIP	MLX interacting protein	-0.31495	0.93269	1.2476	0.9766		0.0234	0.3
202536_at	CHMP2B	chromatin modifying protein 2B	0.48672	0.74547	0.25875	0.95475		0.04525
202537_s_at	CHMP2B	chromatin modifying protein 2B	0.46371	0.78413	0.32042	0.86025		0.13975
202539_s_at	HMGCR	3-hydroxy-3-methylglutaryl-Coenzyme A reductase	0.50708	0.70797	0.20089	0.77		0.23
202543_s_at	GMFB	glia maturation factor, beta	0.90894	-0.19206	-1.101	0.0545		0.9455
202554_s_at	GSTM3(includesEG:2947)	glutathione S-transferase mu 3 (brain)	0.89538	0.84683	-0.048545	0.4047		0.5953
202581_at	HSPA1A	heat shock 70kDa protein 1A	0.66299	0.91132	0.24832	0.9228		0.0772
202598_at	S100A13	S100 calcium binding protein A13	0.73552	0.72823	-0.0072911	0.467		0.533
202607_at	NDST1	N-deacetylase/N-sulfotransferase (heparan glucosaminyl) 1	0.4994	0.68718	0.18779	0.72635		0.27365
202611_s_at	MED14	mediator complex subunit 14	0.72744	0.35679	-0.37065	0.34895		0.65105
202619_s_at	PLOD2	procollagen-lysine, 2-oxoglutarate 5-dioxygenase 2	0.85516	0.89676	0.041597	0.6915		0.3085
202620_s_at	PLOD2	procollagen-lysine, 2-oxoglutarate 5-dioxygenase 2	0.73949	0.34299	-0.39651	0.0258		0.9742
202641_at	ARL3	ADP-ribosylation factor-like 3	0.72118	0.71362	-0.0075611	0.4509		0.5491
202659_at	PSMB10	proteasome (prosome, macropain) subunit, beta type, 10	0.40217	0.69292	0.29075	0.80395		0.19605
202662_s_at	ITPR2	inositol 1,4,5-triphosphate receptor, type 2	0.54014	0.82064	0.2805	0.63695		0.36305
202670_at	MAP2K1	mitogen-activated protein kinase kinase 1	0.43096	0.76412	0.33316	0.68785		0.31215
202672_s_at	ATF3	activating transcription factor 3	0.63162	0.9689	0.33727	0.72625		0.27375
202673_at	DPM1	dolichyl-phosphate mannosyltransferase polypeptide 1, catalytic subunit	0.39861	0.73242	0.33381	0.88375		0.11625
202682_s_at	USP4	ubiquitin specific peptidase 4 (proto-oncogene)	0.74589	0.5166	-0.22928	0.13465		0.86535
202688_at	TNFSF10	tumor necrosis factor (ligand) superfamily, member 10	0.80007	0.61053	-0.18954	0.18075		0.81925
202689_at	RBM15B	RNA binding motif protein 15B	0.25858	-0.77346	-1.032	0.0044	0.2	0.9956
202703_at	DUSP11	dual specificity phosphatase 11 (RNA/RNP complex 1-interacting)	0.51882	0.69135	0.17252	0.85655		0.14345
202717_s_at	CDC16	cell division cycle 16 homolog (S. cerevisiae)	0.4242	0.71818	0.29397	0.94075		0.05925
202722_s_at	GFPT1	glutamine-fructose-6-phosphate transaminase 1	0.64934	0.7893	0.13996	0.751		0.249
202727_s_at	IFNGR1	interferon gamma receptor 1	0.72589	0.34675	-0.37914	0.11785		0.88215
202738_s_at	PHKB	phosphorylase kinase, beta	0.46896	0.82453	0.35557	0.9694		0.0306
202757_at	COBRA1	cofactor of BRCA1	0.69172	0.18137	-0.51035	0.06165		0.93835
202758_s_at	RFXANK	regulatory factor X-associated ankyrin-containing protein	0.73939	0.15145	-0.58794	0.13685		0.86315
202768_at	FOSB	FBJ murine osteosarcoma viral oncogene homolog B	0.036619	0.97632	0.9397	0.92135		0.07865
202780_at	OXCT1	3-oxoacid CoA transferase 1	0.43419	0.86506	0.43087	0.8356		0.1644
202782_s_at	INPP5K	inositol polyphosphate-5-phosphatase K	0.66107	0.71265	0.051574	0.62455		0.37545
202788_at	MAPKAPK3	mitogen-activated protein kinase-activated protein kinase 3	0.74492	0.2411	-0.50382	0.01265		0.98735
202806_at	DBN1	drebrin 1	0.70353	0.4768	-0.22674	0.20885		0.79115
202813_at	TARBP1	TAR (HIV-1) RNA binding protein 1	0.71957	0.49552	-0.22405	0.24625		0.75375
202815_s_at	HEXIM1	hexamethylene bis-acetamide inducible 1	0.70887	0.093713	-0.61516	0.1598		0.8402
202850_at	ABCD3	ATP-binding cassette, sub-family D (ALD), member 3	0.72535	-0.15132	-0.87666	0.0062	0.25	0.9938
202883_s_at	PPP2R1B	protein phosphatase 2 (formerly 2A), regulatory subunit A, beta isoform	0.82739	0.19696	-0.63043	0.03055		0.96945
202887_s_at	DDIT4	DNA-damage-inducible transcript 4	0.72949	0.84357	0.11408	0.7689		0.2311
202898_at	SDC3	syndecan 3	0.26259	0.67074	0.40815	0.9602		0.0398
202909_at	EPM2AIP1	EPM2A (laforin) interacting protein 1	0.65866	0.45387	-0.20479	0.1392		0.8608
202911_at	MSH6	mutS homolog 6 (E. coli)	0.7483	0.033705	-0.7146	0.0351		0.9649
202929_s_at	DDT	D-dopachrome tautomerase	0.43878	0.78709	0.34832	0.9502		0.0498
202930_s_at	SUCLA2	succinate-CoA ligase, ADP-forming, beta subunit	0.27521	0.79027	0.51506	0.9797		0.0203	0.3
202935_s_at	SOX9	SRY (sex determining region Y)-box 9	0.6158	0.72772	0.11192	0.63895		0.36105
202937_x_at	RRP7A	ribosomal RNA processing 7 homolog A (S. cerevisiae)	0.76973	0.86841	0.098677	0.7171		0.2829
202941_at	NDUFV2	NADH dehydrogenase (ubiquinone) flavoprotein 2, 24kDa	0.30563	0.72987	0.42424	0.9586		0.0414
202946_s_at	BTBD3	BTB (POZ) domain containing 3	0.45226	0.74756	0.2953	0.94315		0.05685
202950_at	CRYZ	crystallin, zeta (quinone reductase)	0.35226	0.94007	0.58782	0.9976		0.0024	0.2
202953_at	C1QB	complement component 1, q subcomponent, B chain	0.66143	0.81952	0.15809	0.62095		0.37905
202960_s_at	MUT	methylmalonyl Coenzyme A mutase	0.80056	0.44294	-0.35761	0.1429		0.8571
202967_at	GSTA4	glutathione S-transferase alpha 4	0.11173	0.85431	0.74258	0.9843		0.0157	0.3
202975_s_at	RHOBTB3	Rho-related BTB domain containing 3	0.64422	0.73323	0.089008	0.62475		0.37525
202978_s_at	CREBZF	CREB/ATF bZIP transcription factor	0.94432	0.20129	-0.74303	0.03615		0.96385
202982_s_at	ACOT2	acyl-CoA thioesterase 2	0.64842	0.83347	0.18505	0.7774		0.2226
202984_s_at	BAG5	BCL2-associated athanogene 5	0.66979	0.72385	0.054066	0.5578		0.4422
203000_at	STMN2	stathmin-like 2	0.43391	0.6754	0.24149	0.84515		0.15485
203002_at	AMOTL2	angiomotin like 2	0.71873	0.53301	-0.18572	0.11595		0.88405
203008_x_at	TXNDC9	thioredoxin domain containing 9	0.49156	0.79409	0.30252	0.78555		0.21445
203023_at	NOP16	NOP16 nucleolar protein homolog (yeast)	0.23962	0.69896	0.45934	0.9201		0.0799
203031_s_at	UROS	uroporphyrinogen III synthase	0.59985	0.68339	0.083538	0.6253		0.3747
203032_s_at	FH	fumarate hydratase	0.72772	0.27678	-0.45094	0.0483		0.9517
203033_x_at	FH	fumarate hydratase	0.19124	0.77121	0.57997	0.9095		0.0905
203044_at	CHSY1	chondroitin sulfate synthase 1	0.87445	0.027447	-0.847	0.04295		0.95705
203058_s_at	PAPSS2	3'-phosphoadenosine 5'-phosphosulfate synthase 2	0.80091	0.61575	-0.18516	0.19595		0.80405
203060_s_at	PAPSS2	3'-phosphoadenosine 5'-phosphosulfate synthase 2	0.82275	0.84428	0.021526	0.41335		0.58665
203090_at	SDF2	stromal cell-derived factor 2	0.80091	0.33301	-0.4679	0.13695		0.86305
203096_s_at	RAPGEF2	Rap guanine nucleotide exchange factor (GEF) 2	0.93142	0.95886	0.027436	0.84525		0.15475
203104_at	CSF1R	colony stimulating factor 1 receptor	0.82181	0.7487	-0.073111	0.3507		0.6493
203106_s_at	VPS41	vacuolar protein sorting 41 homolog (S. cerevisiae)	0.698	0.8591	0.1611	0.9537		0.0463
203124_s_at	SLC11A2	solute carrier family 11 (proton-coupled divalent metal ion transporters), member 2	0.86883	0.076262	-0.79257	0.00075	0.15	0.99925
203131_at	PDGFRA	platelet-derived growth factor receptor, alpha polypeptide	0.7926	0.68961	-0.10299	0.2613		0.7387
203140_at	BCL6	B-cell CLL/lymphoma 6	0.91058	0.45515	-0.45543	0.01345		0.98655
203154_s_at	PAK4	p21 protein (Cdc42/Rac)-activated kinase 4	0.10157	0.73859	0.63702	0.9777		0.0223	0.3
203156_at	AKAP11	A kinase (PRKA) anchor protein 11	0.23724	0.75728	0.52004	0.93895		0.06105
203179_at	GALT	galactose-1-phosphate uridylyltransferase	0.18903	0.81266	0.62364	0.95925		0.04075
203190_at	NDUFS8	NADH dehydrogenase (ubiquinone) Fe-S protein 8, 23kDa (NADH-coenzyme Q reductase)	0.68426	0.73914	0.054878	0.5858		0.4142
203199_s_at	MTRR	5-methyltetrahydrofolate-homocysteine methyltransferase reductase	0.62996	0.72365	0.09369	0.64045		0.35955
203200_s_at	MTRR	5-methyltetrahydrofolate-homocysteine methyltransferase reductase	0.78699	0.36921	-0.41778	0.0965		0.9035
203206_at	FAM53B	family with sequence similarity 53, member B	0.54354	0.76381	0.22028	0.8722		0.1278
203218_at	MAPK9	mitogen-activated protein kinase 9	0.25885	0.71487	0.45602	0.8777		0.1223
203231_s_at	ATXN1	ataxin 1	0.80488	0.82662	0.021735	0.51075		0.48925
203252_at	CDK2AP2	cyclin-dependent kinase 2 associated protein 2	0.71191	0.60249	-0.10942	0.36795		0.63205
203255_at	FBXO11	F-box protein 11	0.79328	0.76009	-0.033198	0.36785		0.63215
203278_s_at	PHF21A	PHD finger protein 21A	0.38754	0.72835	0.34081	0.9553		0.0447
203312_x_at	ARF6	ADP-ribosylation factor 6	0.45476	0.71284	0.25808	0.8932		0.1068
203316_s_at	SNRPE	small nuclear ribonucleoprotein polypeptide E	0.83267	0.37367	-0.45899	0.05045		0.94955
203321_s_at	ADNP2	ADNP homeobox 2	0.7206	0.031877	-0.68872	0.05565		0.94435
203333_at	KIFAP3	kinesin-associated protein 3	0.31302	0.70589	0.39287	0.81705		0.18295
203336_s_at	ITGB1BP1	integrin beta 1 binding protein 1	0.8775	0.86828	-0.0092207	0.4694		0.5306
203337_x_at	ITGB1BP1	integrin beta 1 binding protein 1	0.93829	0.89963	-0.038658	0.321		0.679
203339_at	SLC25A12	solute carrier family 25 (mitochondrial carrier, Aralar), member 12	0.37175	0.79698	0.42523	0.9263		0.0737
203349_s_at	ETV5	ets variant 5	0.53404	0.81742	0.28338	0.9942		0.0058	0.25
203350_at	AP1G1	adaptor-related protein complex 1, gamma 1 subunit	0.5492	0.77312	0.22393	0.84455		0.15545
203351_s_at	ORC4L	origin recognition complex, subunit 4-like (yeast)	0.72452	0.69808	-0.026442	0.4558		0.5442
203354_s_at	PSD3	pleckstrin and Sec7 domain containing 3	0.34585	0.80547	0.45962	0.97435		0.02565
203371_s_at	NDUFB3	NADH dehydrogenase (ubiquinone) 1 beta subcomplex, 3, 12kDa	0.69893	0.67524	-0.023692	0.41635		0.58365
203378_at	PCF11	PCF11, cleavage and polyadenylation factor subunit, homolog (S. cerevisiae)	0.49327	0.69357	0.20031	0.7352		0.2648
203390_s_at	KIF3C	kinesin family member 3C	0.36786	0.7357	0.36784	0.9256		0.0744
203394_s_at	HES1	hairy and enhancer of split 1, (Drosophila)	0.58868	0.78727	0.19858	0.71955		0.28045
203395_s_at	HES1	hairy and enhancer of split 1, (Drosophila)	0.68979	0.8284	0.13861	0.65995		0.34005
203404_at	ARMCX2	armadillo repeat containing, X-linked 2	0.44242	0.80606	0.36364	0.75975		0.24025
203405_at	PSMG1	proteasome (prosome, macropain) assembly chaperone 1	0.44992	0.79515	0.34524	0.9032		0.0968
203414_at	MMD	monocyte to macrophage differentiation-associated	0.41346	0.73559	0.32213	0.94265		0.05735
203415_at	PDCD6	programmed cell death 6	0.27068	0.75929	0.4886	0.96875		0.03125
203416_at	CD53	CD53 molecule	0.71663	0.72613	0.0094967	0.51425		0.48575
203423_at	RBP1	retinol binding protein 1, cellular	0.73707	0.39541	-0.34166	0.11955		0.88045
203428_s_at	ASF1A	ASF1 anti-silencing function 1 homolog A (S. cerevisiae)	0.73944	0.002822	-0.73662	0.008	0.25	0.992
203440_at	CDH2	cadherin 2, type 1, N-cadherin (neuronal)	0.76462	0.29643	-0.46819	0.26245		0.73755
203447_at	PSMD5	proteasome (prosome, macropain) 26S subunit, non-ATPase, 5	0.43855	0.6963	0.25775	0.8804		0.1196
203448_s_at	TERF1	telomeric repeat binding factor (NIMA-interacting) 1	0.68207	0.63053	-0.051537	0.37555		0.62445
203454_s_at	ATOX1	ATX1 antioxidant protein 1 homolog (yeast)	0.19258	0.70746	0.51489	0.9612		0.0388
203467_at	PMM1	phosphomannomutase 1	0.71492	0.35785	-0.35707	0.138		0.862
203498_at	RCAN2	regulator of calcineurin 2	0.29752	0.75688	0.45935	0.91325		0.08675
203504_s_at	ABCA1	ATP-binding cassette, sub-family A (ABC1), member 1	0.78774	0.36579	-0.42195	0.0289		0.9711
203511_s_at	TRAPPC3	trafficking protein particle complex 3	0.7283	0.93636	0.20806	0.90435		0.09565
203517_at	MTX2	metaxin 2	0.26176	0.70505	0.44329	0.90575		0.09425
203526_s_at	APC	adenomatous polyposis coli	0.71198	0.55927	-0.1527	0.3043		0.6957
203527_s_at	APC	adenomatous polyposis coli	0.72715	0.81447	0.087316	0.6002		0.3998
203538_at	CAMLG	calcium modulating ligand	0.64901	0.80745	0.15843	0.8259		0.1741
203540_at	GFAP	glial fibrillary acidic protein	0.87674	0.85072	-0.026016	0.49975		0.50025
203542_s_at	KLF9	Kruppel-like factor 9	0.68988	0.67634	-0.013539	0.44525		0.55475
203548_s_at	LPL	lipoprotein lipase	0.66889	0.82604	0.15715	0.6365		0.3635
203551_s_at	COX11	COX11 homolog, cytochrome c oxidase assembly protein (yeast)	0.50317	0.81215	0.30898	0.96305		0.03695
203574_at	NFIL3	nuclear factor, interleukin 3 regulated	0.81871	0.55056	-0.26815	0.20935		0.79065
203583_at	UNC50	unc-50 homolog (C. elegans)	0.62218	0.78693	0.16475	0.8161		0.1839
203594_at	RTCD1	RNA terminal phosphate cyclase domain 1	0.37902	0.74216	0.36314	0.84345		0.15655
203596_s_at	IFIT5	interferon-induced protein with tetratricopeptide repeats 5	0.77925	0.66883	-0.11042	0.24775		0.75225
203614_at	UTP14C	UTP14, U3 small nucleolar ribonucleoprotein, homolog C (yeast)	0.8267	0.40421	-0.4225	0.03165		0.96835
203616_at	POLB	polymerase (DNA directed), beta	0.35804	0.81443	0.45639	0.89155		0.10845
203621_at	NDUFB5	NADH dehydrogenase (ubiquinone) 1 beta subcomplex, 5, 16kDa	0.84763	0.74647	-0.10116	0.26865		0.73135
203628_at	IGF1R	insulin-like growth factor 1 receptor	0.88963	0.67029	-0.21934	0.09975		0.90025
203637_s_at	MID1	midline 1 (Opitz/BBB syndrome)	0.80889	0.50255	-0.30634	0.10625		0.89375
203655_at	XRCC1	X-ray repair complementing defective repair in Chinese hamster cells 1	0.18697	0.72555	0.53858	0.9862		0.0138	0.3
203663_s_at	COX5A	cytochrome c oxidase subunit Va	0.77751	0.75592	-0.021592	0.4365		0.5635
203671_at	TPMT	thiopurine S-methyltransferase	0.66511	0.69841	0.033301	0.59255		0.40745
203672_x_at	TPMT	thiopurine S-methyltransferase	0.69303	0.36677	-0.32626	0.10245		0.89755
203695_s_at	DFNA5	deafness, autosomal dominant 5	0.36047	0.74006	0.37958	0.90185		0.09815
203708_at	PDE4B	phosphodiesterase 4B, cAMP-specific (phosphodiesterase E4 dunce homolog, Drosophila)	0.7187	0.33096	-0.38774	0.16555		0.83445
203721_s_at	UTP18	UTP18, small subunit (SSU) processome component, homolog (yeast)	0.70941	0.44207	-0.26735	0.22415		0.77585
203723_at	ITPKB	inositol 1,4,5-trisphosphate 3-kinase B	0.71826	0.43621	-0.28205	0.2406		0.7594
203725_at	GADD45A	growth arrest and DNA-damage-inducible, alpha	0.94731	0.65438	-0.29293	0.2782		0.7218
203730_s_at	ZKSCAN5	zinc finger with KRAB and SCAN domains 5	0.69498	0.67698	-0.018002	0.431		0.569
203741_s_at	ADCY7	adenylate cyclase 7	0.7163	0.47009	-0.24621	0.13435		0.86565
203752_s_at	JUND	jun D proto-oncogene	0.60572	0.76657	0.16085	0.87805		0.12195
203765_at	GCA	grancalcin, EF-hand calcium binding protein	0.10518	0.70199	0.59681	0.99305		0.00695	0.25
203767_s_at	STS	steroid sulfatase (microsomal), isozyme S	0.31709	0.72033	0.40324	0.9055		0.0945
203774_at	MTR	5-methyltetrahydrofolate-homocysteine methyltransferase	0.74795	0.55777	-0.19017	0.20065		0.79935
203775_at	SLC25A13	solute carrier family 25, member 13 (citrin)	0.13697	0.79778	0.66081	0.9632		0.0368
203793_x_at	PCGF2	polycomb group ring finger 2	0.72576	0.019914	-0.70585	0.00765	0.25	0.99235
203798_s_at	VSNL1	visinin-like 1	0.46201	0.72244	0.26043	0.71985		0.28015
203810_at	DNAJB4	DnaJ (Hsp40) homolog, subfamily B, member 4	0.59478	0.76272	0.16793	0.60325		0.39675
203814_s_at	NQO2	NAD(P)H dehydrogenase, quinone 2	0.52905	0.82211	0.29307	0.947		0.053
203815_at	GSTT1	glutathione S-transferase theta 1	0.909	0.97057	0.061567	0.64035		0.35965
203817_at	GUCY1B3	guanylate cyclase 1, soluble, beta 3	0.34672	0.75874	0.41202	0.71295		0.28705
203821_at	HBEGF	heparin-binding EGF-like growth factor	0.27659	0.82751	0.55091	0.7342		0.2658
203829_at	ELP4	elongation protein 4 homolog (S. cerevisiae)	0.71018	-0.22727	-0.93745	0.03275		0.96725
203832_at	SNRPF	small nuclear ribonucleoprotein polypeptide F	0.75051	0.26867	-0.48185	0.06135		0.93865
203846_at	TRIM32	tripartite motif-containing 32	0.40328	0.81462	0.41134	0.83925		0.16075
203852_s_at	SMN1	survival of motor neuron 1, telomeric	0.7297	0.74823	0.018525	0.5577		0.4423
203880_at	COX17	COX17 cytochrome c oxidase assembly homolog (S. cerevisiae)	0.57477	0.74918	0.17441	0.72855		0.27145
203889_at	SCG5	secretogranin V (7B2 protein)	0.50395	0.7639	0.25995	0.6946		0.3054
203893_at	TAF9	TAF9 RNA polymerase II, TATA box binding protein (TBP)-associated factor, 32kDa	0.714	0.49679	-0.21721	0.2698		0.7302
203894_at	TUBG2	tubulin, gamma 2	0.75357	0.50992	-0.24365	0.10915		0.89085
203897_at	LYRM1	LYR motif containing 1	0.30105	0.79855	0.4975	0.9872		0.0128	0.3
203912_s_at	DNASE1L1	deoxyribonuclease I-like 1	0.72866	0.21996	-0.5087	0.05795		0.94205
203925_at	GCLM	glutamate-cysteine ligase, modifier subunit	0.43348	0.7677	0.33422	0.9305		0.0695
203939_at	NT5E	5'-nucleotidase, ecto (CD73)	0.79649	0.62794	-0.16854	0.20305		0.79695
203946_s_at	ARG2	arginase, type II	0.63411	0.88811	0.254	0.9145		0.0855
203959_s_at	ZBTB40	zinc finger and BTB domain containing 40	0.86794	0.21287	-0.65507	0.0277		0.9723
203973_s_at	CEBPD	CCAAT/enhancer binding protein (C/EBP), delta	0.9644	0.86813	-0.096268	0.045		0.955
204004_at	PAWR	PRKC, apoptosis, WT1, regulator	0.2238	0.75981	0.53601	0.99075		0.00925	0.3
204008_at	DNAL4	dynein, axonemal, light chain 4	0.073819	0.81852	0.7447	0.987		0.013	0.3
204011_at	SPRY2	sprouty homolog 2 (Drosophila)	0.72301	0.42008	-0.30293	0.11345		0.88655
204018_x_at	HBA1	hemoglobin, alpha 1	0.58522	0.73332	0.1481	0.7218		0.2782
204019_s_at	SH3YL1	SH3 domain containing, Ysc84-like 1 (S. cerevisiae)	0.69914	0.296	-0.40314	0.04395		0.95605
204022_at	WWP2	WW domain containing E3 ubiquitin protein ligase 2	0.21453	0.72698	0.51244	0.9213		0.0787
204035_at	SCG2	secretogranin II (chromogranin C)	0.13961	0.80489	0.66529	0.99525		0.00475	0.25
204036_at	LPAR1	lysophosphatidic acid receptor 1	0.49655	0.71085	0.2143	0.70545		0.29455
204037_at	LPAR1	lysophosphatidic acid receptor 1	0.57745	0.76094	0.1835	0.8041		0.1959
204041_at	MAOB	monoamine oxidase B	0.22621	0.87306	0.64686	0.99945		0.00055	0.1
204074_s_at	KIAA0562	KIAA0562	0.03254	0.73805	0.70551	0.9119		0.0881
204077_x_at	ENTPD4	ectonucleoside triphosphate diphosphohydrolase 4	0.66786	0.88598	0.21812	0.7091		0.2909
204079_at	TPST2	tyrosylprotein sulfotransferase 2	0.71094	0.79147	0.080531	0.60785		0.39215
204094_s_at	TSC22D2	TSC22 domain family, member 2	0.74835	0.5114	-0.23695	0.1167		0.8833
204106_at	TESK1	testis-specific kinase 1	0.69685	0.42208	-0.27477	0.2241		0.7759
204148_s_at	ZP3	zona pellucida glycoprotein 3 (sperm receptor)	0.83622	0.85885	0.022636	0.6302		0.3698
204151_x_at	AKR1C1	aldo-keto reductase family 1, member C1 (dihydrodiol dehydrogenase 1; 20-alpha (3-alpha)-hydroxysteroid dehydrogenase)	0.75848	0.69186	-0.066616	0.33665		0.66335
204170_s_at	CKS2(includesEG:1164)	CDC28 protein kinase regulatory subunit 2	0.48719	0.81696	0.32978	0.98905		0.01095	0.3
204185_x_at	PPID	peptidylprolyl isomerase D	0.49019	0.69352	0.20332	0.76785		0.23215
204199_at	RALGPS1	Ral GEF with PH domain and SH3 binding motif 1	0.76436	0.35861	-0.40575	0.05425		0.94575
204202_at	IQCE	IQ motif containing E	0.25192	0.68196	0.43005	0.94425		0.05575
204223_at	PRELP	proline/arginine-rich end leucine-rich repeat protein	0.90004	0.26668	-0.63337	0.01	0.3	0.99
204225_at	HDAC4	histone deacetylase 4	0.34476	0.78803	0.44328	0.9548		0.0452
204284_at	PPP1R3C	protein phosphatase 1, regulatory (inhibitor) subunit 3C	0.65203	0.75241	0.10038	0.62765		0.37235
204285_s_at	PMAIP1	phorbol-12-myristate-13-acetate-induced protein 1	0.21121	0.80825	0.59704	0.8807		0.1193
204295_at	SURF1	surfeit 1	0.83888	0.47368	-0.3652	0.0042	0.2	0.9958
204297_at	PIK3C3	phosphoinositide-3-kinase, class 3	0.77212	0.64033	-0.13178	0.26045		0.73955
204304_s_at	PROM1	prominin 1	0.4425	0.70197	0.25948	0.7808		0.2192
204319_s_at	RGS10	regulator of G-protein signaling 10	0.63705	0.79971	0.16266	0.74675		0.25325
204326_x_at	MT1X	metallothionein 1X	0.96241	0.80884	-0.15357	0.02475		0.97525
204343_at	ABCA3	ATP-binding cassette, sub-family A (ABC1), member 3	0.76751	0.27277	-0.49474	0.05155		0.94845
204345_at	COL16A1	collagen, type XVI, alpha 1	0.69463	0.33808	-0.35655	0.1198		0.8802
204362_at	SKAP2	src kinase associated phosphoprotein 2	0.70613	0.63617	-0.06996	0.431		0.569
204363_at	F3	coagulation factor III (thromboplastin, tissue factor)	0.93111	0.13002	-0.80108	0.0926		0.9074
204366_s_at	GTF3C2	general transcription factor IIIC, polypeptide 2, beta 110kDa	-0.13731	-0.78908	-0.65177	0.0353		0.9647
204378_at	BCAS1	breast carcinoma amplified sequence 1	0.41481	0.7482	0.33339	0.83825		0.16175
204386_s_at	MRP63	mitochondrial ribosomal protein 63	0.37749	0.84282	0.46533	0.9597		0.0403
204398_s_at	EML2	echinoderm microtubule associated protein like 2	0.74495	-0.11594	-0.86089	0.0187		0.9813
204407_at	TTF2	transcription termination factor, RNA polymerase II	0.5812	0.69321	0.11201	0.62795		0.37205
204411_at	KIF21B	kinesin family member 21B	0.57498	0.77322	0.19824	0.82615		0.17385
204418_x_at	GSTM2	glutathione S-transferase mu 2 (muscle)	0.79211	0.80402	0.011908	0.5151		0.4849
204435_at	NUPL1	nucleoporin like 1	-0.025373	0.70924	0.73461	0.9501		0.0499
204436_at	PLEKHO2	pleckstrin homology domain containing, family O member 2	0.80135	0.15358	-0.64777	0.0238		0.9762
204438_at	MRC1	mannose receptor, C type 1	0.76257	0.86445	0.10189	0.6995		0.3005
204439_at	IFI44L	interferon-induced protein 44-like	0.7719	0.63455	-0.13736	0.2718		0.7282
204440_at	CD83	CD83 molecule	0.088034	0.90043	0.8124	0.8377		0.1623
204453_at	ZNF84	zinc finger protein 84	0.70982	0.15262	-0.55721	0.0251		0.9749
204462_s_at	SLC16A2	solute carrier family 16, member 2 (monocarboxylic acid transporter 8)	0.30506	0.76281	0.45775	0.97775		0.02225	0.3
204472_at	GEM	GTP binding protein overexpressed in skeletal muscle	0.76126	0.34785	-0.41341	0.1771		0.8229
204510_at	CDC7	cell division cycle 7 homolog (S. cerevisiae)	0.71938	0.76076	0.041378	0.5814		0.4186
204538_x_at	NPIP	nuclear pore complex interacting protein	0.43755	0.76988	0.33233	0.72375		0.27625
204545_at	PEX6	peroxisomal biogenesis factor 6	0.72106	0.64818	-0.07288	0.27745		0.72255
204550_x_at	GSTM1	glutathione S-transferase mu 1	0.72435	0.80676	0.082415	0.63395		0.36605
204552_at	INPP4A	inositol polyphosphate-4-phosphatase, type I, 107kDa	0.5008	0.77498	0.27418	0.74795		0.25205
204556_s_at	DZIP1	DAZ interacting protein 1	0.28542	0.72711	0.44169	0.89125		0.10875
204561_x_at	APOC4	apolipoprotein C-IV	0.72325	0.29619	-0.42706	0.0943		0.9057
204569_at	ICK	intestinal cell (MAK-like) kinase	0.033448	0.68473	0.65128	0.9982		0.0018	0.2
204571_x_at	PIN4	protein (peptidylprolyl cis/trans isomerase) NIMA-interacting, 4 (parvulin)	0.71651	0.47321	-0.2433	0.16935		0.83065
204577_s_at	CLUAP1	clusterin associated protein 1	0.77353	0.57805	-0.19548	0.28995		0.71005
204593_s_at	SMCR7L	Smith-Magenis syndrome chromosome region, candidate 7-like	0.90785	0.47307	-0.43478	0.0017	0.2	0.9983
204612_at	PKIA	protein kinase (cAMP-dependent, catalytic) inhibitor alpha	0.22215	0.80887	0.58672	0.9262		0.0738
204617_s_at	ACD	adrenocortical dysplasia homolog (mouse)	0.57057	0.74073	0.17017	0.6921		0.3079
204619_s_at	VCAN	versican	0.69763	0.68327	-0.014364	0.47455		0.52545
204620_s_at	VCAN	versican	0.73938	0.63173	-0.10766	0.37095		0.62905
204621_s_at	NR4A2	nuclear receptor subfamily 4, group A, member 2	0.40274	0.81167	0.40893	0.7057		0.2943
204622_x_at	NR4A2	nuclear receptor subfamily 4, group A, member 2	0.23925	0.76557	0.52632	0.73455		0.26545
204635_at	RPS6KA5	ribosomal protein S6 kinase, 90kDa, polypeptide 5	0.61809	0.71497	0.096873	0.72795		0.27205
204656_at	SHB	Src homology 2 domain containing adaptor protein B	-0.27052	0.74165	1.0122	0.99135		0.00865	0.3
204663_at	ME3	malic enzyme 3, NADP(+)-dependent, mitochondrial	0.31765	0.76906	0.45141	0.86335		0.13665
204671_s_at	ANKRD6	ankyrin repeat domain 6	0.48293	0.84701	0.36408	0.9334		0.0666
204675_at	SRD5A1	steroid-5-alpha-reductase, alpha polypeptide 1 (3-oxo-5 alpha-steroid delta 4-dehydrogenase alpha 1)	0.52102	0.74721	0.22619	0.8298		0.1702
204688_at	SGCE	sarcoglycan, epsilon	0.68772	-0.16481	-0.85254	0.0024	0.2	0.9976
204693_at	CDC42EP1	CDC42 effector protein (Rho GTPase binding) 1	0.70548	0.26911	-0.43637	0.1671		0.8329
204700_x_at	C1ORF107	chromosome 1 open reading frame 107	0.70658	0.15486	-0.55172	0.043		0.957
204715_at	PANX1	pannexin 1	0.82926	0.49127	-0.33799	0.1391		0.86095
204743_at	TAGLN3	transgelin 3	0.030167	0.73829	0.70812	0.9999		0.0001	0.05
204745_x_at	MT1G	metallothionein 1G	0.8904	0.64934	-0.24106	0.07195		0.92805
204748_at	PTGS2	prostaglandin-endoperoxide synthase 2 (prostaglandin G/H synthase and cyclooxygenase)	0.81188	0.86981	0.05793	0.684		0.316
204753_s_at	HLF(includesEG:3131)	hepatic leukemia factor	0.66839	0.73535	0.066965	0.63385		0.36615
204756_at	MAP2K5	mitogen-activated protein kinase kinase 5	0.67855	0.050683	-0.62787	0.0041	0.2	0.9959
204780_s_at	FAS	Fas (TNF receptor superfamily, member 6)	0.73689	0.66598	-0.070907	0.34985		0.65015
204784_s_at	MLF1	myeloid leukemia factor 1	0.39221	0.71016	0.31795	0.8102		0.1898
204793_at	GPRASP1	G protein-coupled receptor associated sorting protein 1	0.35812	0.84964	0.49152	0.82635		0.17365
204797_s_at	EML1(includesEG:2009)	echinoderm microtubule associated protein like 1	0.74655	-0.072227	-0.81878	0.00085	0.15	0.99915
204806_x_at	HLA-F	major histocompatibility complex, class I, F	-0.15744	0.70462	0.86206	0.9878		0.0122	0.3
204820_s_at	BTN3A3	butyrophilin, subfamily 3, member A3	0.80065	0.59849	-0.20216	0.0887		0.9113
204838_s_at	MLH3	mutL homolog 3 (E. coli)	0.79333	0.24798	-0.54535	0.01695		0.98305
204849_at	TCFL5	transcription factor-like 5 (basic helix-loop-helix)	0.82328	0.89245	0.06917	0.711		0.289
204862_s_at	NME3	non-metastatic cells 3, protein expressed in	0.70354	-0.10918	-0.81272	0.04345		0.95655
204905_s_at	EEF1E1	eukaryotic translation elongation factor 1 epsilon 1	0.45543	0.8036	0.34817	0.7843		0.2157
204959_at	MNDA	myeloid cell nuclear differentiation antigen	0.69293	0.15114	-0.54179	0.03735		0.96265
204974_at	RAB3A	RAB3A, member RAS oncogene family	0.73673	0.12063	-0.6161	0.08375		0.91625
204984_at	GPC4	glypican 4	0.79236	0.66101	-0.13134	0.366		0.63405
204992_s_at	PFN2	profilin 2	0.3173	0.78536	0.46806	0.8055		0.1945
205008_s_at	CIB2	calcium and integrin binding family member 2	0.78913	0.6783	-0.11082	0.2879		0.7121
205047_s_at	ASNS	asparagine synthetase	0.53589	0.76368	0.22779	0.77525		0.22475
205048_s_at	PSPH	phosphoserine phosphatase	0.98575	0.97932	-0.0064258	0.3118		0.6882
205052_at	AUH	AU RNA binding protein/enoyl-Coenzyme A hydratase	0.27347	0.86264	0.58918	0.968		0.032
205078_at	PIGF	phosphatidylinositol glycan anchor biosynthesis, class F	0.76534	0.23498	-0.53036	0.02495		0.97505
205097_at	SLC26A2	solute carrier family 26 (sulfate transporter), member 2	0.94567	-0.21412	-1.1598	0.0048	0.25	0.9952
205110_s_at	FGF13	fibroblast growth factor 13	0.45013	0.77717	0.32703	0.8411		0.1589
205143_at	NCAN	neurocan	0.71	0.67793	-0.03207	0.4645		0.5355
205152_at	SLC6A1	solute carrier family 6 (neurotransmitter transporter, GABA), member 1	-0.061906	-0.68613	-0.62422	0.05035		0.94965
205156_s_at	ACCN2	amiloride-sensitive cation channel 2, neuronal	0.70154	0.16803	-0.53351	0.0733		0.9267
205169_at	RBBP5	retinoblastoma binding protein 5	0.74884	0.77068	0.021836	0.5545		0.4455
205176_s_at	ITGB3BP	integrin beta 3 binding protein (beta3-endonexin)	0.84052	0.76207	-0.07845	0.3803		0.6197
205182_s_at	ZNF324	zinc finger protein 324	0.69637	0.8222	0.12583	0.7793		0.2207
205193_at	MAFF	v-maf musculoaponeurotic fibrosarcoma oncogene homolog F (avian)	0.83788	0.67617	-0.16171	0.3102		0.6898
205197_s_at	ATP7A	ATPase, Cu++ transporting, alpha polypeptide	0.65028	0.72979	0.079504	0.6113		0.3887
205200_at	CLEC3B	C-type lectin domain family 3, member B	0.89597	0.57297	-0.32301	0.0232		0.9768
205202_at	PCMT1	protein-L-isoaspartate (D-aspartate) O-methyltransferase	0.32797	0.8349	0.50693	0.9153		0.0847
205204_at	NMB	neuromedin B	-0.53421	0.87644	1.4107	0.99165		0.00835	0.25
205249_at	EGR2	early growth response 2 (Krox-20 homolog, Drosophila)	0.55106	0.86275	0.31169	0.6846		0.3154
205251_at	PER2	period homolog 2 (Drosophila)	0.84407	0.90417	0.060104	0.76425		0.23575
205260_s_at	ACYP1	acylphosphatase 1, erythrocyte (common) type	0.7057	0.27947	-0.42623	0.0827		0.9173
205263_at	BCL10	B-cell CLL/lymphoma 10	0.7441	-0.0040825	-0.74818	0.0527		0.9473
205268_s_at	ADD2	adducin 2 (beta)	0.69728	0.62628	-0.070998	0.4069		0.5931
205279_s_at	GLRB	glycine receptor, beta	0.39974	0.71515	0.31541	0.80275		0.19725
205280_at	GLRB	glycine receptor, beta	0.18048	0.78626	0.60578	0.94195		0.05805
205281_s_at	PIGA	phosphatidylinositol glycan anchor biosynthesis, class A	0.84799	0.3711	-0.47688	0.20525		0.79475
205335_s_at	SRP19	signal recognition particle 19kDa	0.52947	0.76078	0.23131	0.83455		0.16545
205352_at	SERPINI1	serpin peptidase inhibitor, clade I (neuroserpin), member 1	-0.048545	0.80081	0.84935	0.95275		0.04725
205379_at	CBR3	carbonyl reductase 3	0.10341	0.71123	0.60782	0.92425		0.07575
205395_s_at	MRE11A	MRE11 meiotic recombination 11 homolog A (S. cerevisiae)	0.42692	0.73863	0.31171	0.91175		0.0883
205406_s_at	SPA17	sperm autoantigenic protein 17	0.74351	0.57976	-0.16375	0.2704		0.7296
205413_at	MPPED2(includesEG:744)	metallophosphoesterase domain containing 2	0.79202	0.43377	-0.35826	0.0676		0.9324
205442_at	MFAP3L	microfibrillar-associated protein 3-like	0.70049	0.38828	-0.31221	0.1328		0.8672
205462_s_at	HPCAL1	hippocalcin-like 1	0.28301	0.76817	0.48516	0.9094		0.0906
205480_s_at	UGP2	UDP-glucose pyrophosphorylase 2	0.32125	0.75329	0.43204	0.8544		0.1456
205485_at	RYR1(includesEG:6261)	ryanodine receptor 1 (skeletal)	0.76532	0.46616	-0.29917	0.2344		0.7656
205493_s_at	DPYSL4	dihydropyrimidinase-like 4	0.71013	0.41469	-0.29544	0.21825		0.78175
205514_at	ZNF415	zinc finger protein 415	0.69829	-0.063874	-0.76216	0.0104	0.3	0.9896
205523_at	HAPLN1	hyaluronan and proteoglycan link protein 1	0.62007	0.82255	0.20248	0.895		0.105
205571_at	LIPT1	lipoyltransferase 1	0.74669	0.64233	-0.10436	0.17295		0.82705
205575_at	C1QL1	complement component 1, q subcomponent-like 1	0.69118	0.18302	-0.50816	0.03975		0.96025
205594_at	ZNF652	zinc finger protein 652	0.72165	0.17428	-0.54737	0.03865		0.96135
205625_s_at	CALB1	calbindin 1, 28kDa	0.37296	0.77887	0.40591	0.8618		0.1382
205626_s_at	CALB1	calbindin 1, 28kDa	0.22359	0.80151	0.57792	0.97025		0.02975
205630_at	CRH	corticotropin releasing hormone	0.5758	0.71272	0.13692	0.73135		0.26865
205633_s_at	ALAS1	aminolevulinate, delta-, synthase 1	0.46998	0.77983	0.30985	0.816		0.184
205652_s_at	TTLL1	tubulin tyrosine ligase-like family, member 1	0.71045	0.38935	-0.32109	0.25295		0.74705
205687_at	UBFD1	ubiquitin family domain containing 1	0.30442	0.85109	0.54667	0.94855		0.05145
205690_s_at	BUD31(includesEG:8896)	BUD31 homolog (S. cerevisiae)	0.11705	0.89431	0.77726	0.98755		0.01245	0.3
205707_at	IL17RA	interleukin 17 receptor A	0.61956	0.75125	0.13169	0.64195		0.35805
205711_x_at	ATP5C1	ATP synthase, H+ transporting, mitochondrial F1 complex, gamma polypeptide 1	0.18708	0.75953	0.57245	0.9475		0.0525
205731_s_at	NCOA2	nuclear receptor coactivator 2	0.77125	-0.022548	-0.7938	0.07845		0.92155
205739_x_at	ZNF107	zinc finger protein 107	0.72127	0.35495	-0.36632	0.0797		0.9203
205741_s_at	DTNA	dystrobrevin, alpha	0.25416	0.75032	0.49616	0.7808		0.2192
205751_at	SH3GL2	SH3-domain GRB2-like 2	-0.1852	0.69453	0.87972	0.9456		0.0544
205752_s_at	GSTM5	glutathione S-transferase mu 5	0.94078	0.90433	-0.036451	0.2098		0.7902
205799_s_at	SLC3A1	solute carrier family 3 (cystine, dibasic and neutral amino acid transporters, activator of cystine, dibasic and neutral amino acid transport), member 1	0.69434	0.25964	-0.43469	0.11185		0.88815
205826_at	MYOM2	myomesin (M-protein) 2, 165kDa	0.5541	0.75947	0.20537	0.7976		0.2024
205856_at	SLC14A1	solute carrier family 14 (urea transporter), member 1 (Kidd blood group)	0.96214	0.83924	-0.12289	0.30965		0.69035
205862_at	GREB1	GREB1 protein	-0.011081	0.69338	0.70446	0.9893		0.0107	0.3
205872_x_at	PDE4DIP	phosphodiesterase 4D interacting protein	0.51225	0.87756	0.3653	0.9779		0.0221	0.3
205875_s_at	TREX1(includesEG:11277)	three prime repair exonuclease 1	0.56198	0.77874	0.21677	0.9251		0.0749
205883_at	ZBTB16	zinc finger and BTB domain containing 16	0.9083	0.51305	-0.39526	0.0621		0.9379
205889_s_at	JAKMIP2	janus kinase and microtubule interacting protein 2	0.79414	0.2106	-0.58354	0.0063	0.25	0.9937
205898_at	CX3CR1	chemokine (C-X3-C motif) receptor 1	0.89189	0.75119	-0.1407	0.27385		0.72615
205901_at	PNOC	prepronociceptin	0.27532	0.73053	0.45521	0.9572		0.0428
205924_at	RAB3B	RAB3B, member RAS oncogene family	0.82791	0.85273	0.024824	0.53215		0.46785
205931_s_at	CREB5	cAMP responsive element binding protein 5	0.55646	0.7826	0.22615	0.79055		0.20945
205938_at	PPM1E	protein phosphatase 1E (PP2C domain containing)	0.42893	0.74239	0.31345	0.8084		0.1916
205984_at	CRHBP	corticotropin releasing hormone binding protein	0.31585	0.89005	0.57419	0.9937		0.0063	0.25
205997_at	ADAM28	ADAM metallopeptidase domain 28	0.071051	0.81674	0.74569	0.9145		0.0855
206017_at	KIAA0319	KIAA0319	0.3033	0.71145	0.40815	0.9525		0.0475
206042_x_at	SNRPN	small nuclear ribonucleoprotein polypeptide N	0.7008	0.73954	0.038737	0.53785		0.46215
206084_at	PTPRR	protein tyrosine phosphatase, receptor type, R	0.071049	0.74106	0.67001	0.98275		0.01725	0.3
206095_s_at	FUSIP1	FUS interacting protein (serine/arginine-rich) 1	0.69484	0.19499	-0.49985	0.1162		0.8838
206100_at	CPM	carboxypeptidase M	0.56107	0.69753	0.13646	0.65635		0.34365
206116_s_at	TPM1	tropomyosin 1 (alpha)	0.4574	0.77162	0.31422	0.8705		0.1295
206144_at	MAGI1	membrane associated guanylate kinase, WW and PDZ domain containing 1	0.0031305	0.7372	0.73407	0.9119		0.0881
206190_at	GPR17(includesEG:2840)	G protein-coupled receptor 17	0.7831	0.66338	-0.11972	0.32585		0.67415
206191_at	ENTPD3	ectonucleoside triphosphate diphosphohydrolase 3	0.54734	0.77816	0.23082	0.79515		0.20485
206197_at	NME5	non-metastatic cells 5, protein expressed in (nucleoside-diphosphate kinase)	0.64946	0.77744	0.12798	0.622		0.378
206213_at	WNT10B	wingless-type MMTV integration site family, member 10B	0.7703	0.21974	-0.55056	0.0168		0.9832
206215_at	OPCML	opioid binding protein/cell adhesion molecule-like	-0.46318	0.74179	1.205	0.99865		0.00135	0.2
206231_at	KCNN1	potassium intermediate/small conductance calcium-activated channel, subfamily N, member 1	0.71626	0.69481	-0.021455	0.47105		0.52895
206235_at	LIG4	ligase IV, DNA, ATP-dependent	0.49303	0.7817	0.28867	0.93755		0.06245
206330_s_at	SHC3	SHC (Src homology 2 domain containing) transforming protein 3	0.45843	0.74355	0.28512	0.8771		0.1229
206355_at	GNAL	guanine nucleotide binding protein (G protein), alpha activating activity polypeptide, olfactory type	0.70498	0.5595	-0.14547	0.2841		0.7159
206376_at	SLC6A15	solute carrier family 6 (neutral amino acid transporter), member 15	0.38586	0.71451	0.32865	0.83835		0.16165
206453_s_at	NDRG2	NDRG family member 2	0.7085	0.50894	-0.19956	0.2666		0.7334
206461_x_at	MT1H	metallothionein 1H	0.9677	0.72512	-0.24258	0.0436		0.9564
206465_at	ACSBG1	acyl-CoA synthetase bubblegum family member 1	0.5664	0.70896	0.14256	0.7931		0.2069
206507_at	ZSCAN12	zinc finger and SCAN domain containing 12	0.77649	0.099482	-0.67701	0.24105		0.75895
206552_s_at	TAC1	tachykinin, precursor 1	-0.43312	0.71118	1.1443	0.99935		0.00065	0.15
206555_s_at	THUMPD1	THUMP domain containing 1	0.74324	0.058485	-0.68476	0.00445	0.2	0.99555
206565_x_at	SMA4	glucuronidase, beta pseudogene	0.78074	0.88463	0.10388	0.7462		0.2538
206625_at	PRPH2	peripherin 2 (retinal degeneration, slow)	0.62293	0.93052	0.30759	0.9805		0.0195	0.3
206707_x_at	FAM65B	family with sequence similarity 65, member B	0.74213	-0.39618	-1.1383	0.00065	0.15	0.99945
206711_at	CXORF1	chromosome X open reading frame 1	0.081768	0.79646	0.71469	0.87435		0.12565
206756_at	CHST7	carbohydrate (N-acetylglucosamine 6-O) sulfotransferase 7	0.83618	0.36636	-0.46982	0.0473		0.9527
206777_s_at	CRYBB2	crystallin, beta B2	0.97387	0.83283	-0.14105	0.4264		0.5736
206785_s_at	KLRC2	killer cell lectin-like receptor subfamily C, member 2	0.44552	0.91328	0.46776	0.9842		0.0158	0.3
206825_at	OXTR	oxytocin receptor	0.98004	0.71632	-0.26372	0.20365		0.79635
206864_s_at	HRK	harakiri, BCL2 interacting protein (contains only BH3 domain)	0.42028	0.81281	0.39253	0.8768		0.1232
206932_at	CH25H	cholesterol 25-hydroxylase	0.82427	0.99729	0.17302	0.77365		0.22635
206976_s_at	HSPH1	heat shock 105kDa/110kDa protein 1	0.28629	0.75236	0.46607	0.92825		0.07175
207006_s_at	CCDC106	coiled-coil domain containing 106	-0.14711	0.77578	0.92289	0.99375		0.00625	0.25
207068_at	ZFP37	zinc finger protein 37 homolog (mouse)	0.83749	0.49599	-0.3415	0.19655		0.80345
207076_s_at	ASS1	argininosuccinate synthetase 1	0.68631	0.84261	0.1563	0.8521		0.1479
207078_at	MED6	mediator complex subunit 6	0.78931	0.25314	-0.53616	0.19685		0.80315
207084_at	POU3F2	POU class 3 homeobox 2	0.74612	0.78546	0.039338	0.61905		0.38095
207091_at	P2RX7	purinergic receptor P2X, ligand-gated ion channel, 7	0.80746	0.4322	-0.37526	0.07485		0.92515
207132_x_at	PFDN5	prefoldin subunit 5	0.14215	0.70659	0.56444	0.99995		5e-05	0.05
207141_s_at	KCNJ3	potassium inwardly-rectifying channel, subfamily J, member 3	0.77471	0.62265	-0.15205	0.1891		0.8109
207169_x_at	DDR1	discoidin domain receptor tyrosine kinase 1	0.69196	0.21113	-0.48083	0.0799		0.9201
207174_at	GPC5	glypican 5	0.52845	0.71629	0.18784	0.7509		0.2491
207181_s_at	CASP7	caspase 7, apoptosis-related cysteine peptidase	0.8826	0.14069	-0.74191	0.2228		0.7772
207183_at	GPR19	G protein-coupled receptor 19	0.50995	0.78475	0.2748	0.8475		0.1525
207227_x_at	RFPL2	ret finger protein-like 2	0.87305	0.52628	-0.34678	0.06595		0.93405
207232_s_at	DZIP3	DAZ interacting protein 3, zinc finger	0.69558	0.40532	-0.29026	0.0998		0.9002
207299_s_at	GRM1	glutamate receptor, metabotropic 1	0.52129	0.8089	0.28761	0.8424		0.1576
207332_s_at	TFRC	transferrin receptor (p90, CD71)	0.51344	0.78647	0.27303	0.9007		0.0993
207467_x_at	CAST	calpastatin	0.8057	0.67571	-0.12999	0.2066		0.7934
207483_s_at	CAND1	cullin-associated and neddylation-dissociated 1	0.57105	0.77314	0.20209	0.76785		0.23215
207507_s_at	ATP5G3	ATP synthase, H+ transporting, mitochondrial F0 complex, subunit C3 (subunit 9)	0.5951	0.78611	0.19101	0.69205		0.30795
207508_at	ATP5G3	ATP synthase, H+ transporting, mitochondrial F0 complex, subunit C3 (subunit 9)	0.677	0.82077	0.14376	0.6463		0.3537
207513_s_at	ZNF189	zinc finger protein 189	0.77022	0.030122	-0.7401	0.023		0.977
207542_s_at	AQP1	aquaporin 1 (Colton blood group)	0.79154	0.059582	-0.73196	0.05625		0.94375
207547_s_at	FAM107A	family with sequence similarity 107, member A	0.7199	0.51069	-0.20921	0.2662		0.7338
207573_x_at	ATP5L	ATP synthase, H+ transporting, mitochondrial F0 complex, subunit G	0.27154	0.77456	0.50302	0.8284		0.1716
207574_s_at	GADD45B	growth arrest and DNA-damage-inducible, beta	0.98509	0.98637	0.0012818	0.51435		0.48565
207627_s_at	TFCP2	transcription factor CP2	0.82975	0.65028	-0.17947	0.19095		0.80905
207659_s_at	MOBP	myelin-associated oligodendrocyte basic protein	0.54988	0.74883	0.19895	0.836		0.164
207668_x_at	PDIA6	protein disulfide isomerase family A, member 6	0.80074	0.55835	-0.24239	0.2367		0.7633
207761_s_at	METTL7A	methyltransferase like 7A	0.69632	0.4693	-0.22702	0.242		0.758
207768_at	EGR4	early growth response 4	0.61869	0.86456	0.24587	0.7504		0.2496
207800_at	AKAP5	A kinase (PRKA) anchor protein 5	0.38271	0.69473	0.31202	0.80255		0.19745
207805_s_at	PSMD9	proteasome (prosome, macropain) 26S subunit, non-ATPase, 9	0.81945	0.45482	-0.36463	0.02355		0.97645
207855_s_at	CLCC1	chloride channel CLIC-like 1	0.48785	0.79202	0.30417	0.93185		0.06815
207914_x_at	EVX1	even-skipped homeobox 1	0.11169	-0.73289	-0.84459	0.0063	0.25	0.9937
207966_s_at	GLG1	golgi apparatus protein 1	0.63323	0.81008	0.17684	0.72215		0.27785
207981_s_at	ESRRG	estrogen-related receptor gamma	0.76684	0.30418	-0.46267	0.0364		0.9636
207984_s_at	MPP2	membrane protein, palmitoylated 2 (MAGUK p55 subfamily member 2)	0.25393	0.70786	0.45393	0.8925		0.1075
208021_s_at	RFC1	replication factor C (activator 1) 1, 145kDa	0.72407	0.13194	-0.59213	0.0052	0.25	0.9948
208029_s_at	LAPTM4B	lysosomal protein transmembrane 4 beta	0.76549	0.75921	-0.0062808	0.44275		0.55725
208044_s_at	PPARD	peroxisome proliferator-activated receptor delta	0.038788	0.7685	0.72971	0.99815		0.00185	0.2
208065_at	ST8SIA3	ST8 alpha-N-acetyl-neuraminide alpha-2,8-sialyltransferase 3	-0.068105	0.69395	0.76206	0.9244		0.0756
208073_x_at	TTC3	tetratricopeptide repeat domain 3	0.49191	0.7052	0.21329	0.74725		0.25275
208078_s_at	SNF1LK	salt-inducible kinase 1	0.92178	0.98674	0.064951	0.68665		0.31335
208110_x_at	MED25	mediator complex subunit 25	0.72561	0.41949	-0.30612	0.0568		0.9432
208151_x_at	DDX17	DEAD (Asp-Glu-Ala-Asp) box polypeptide 17	0.99467	0.98869	-0.0059838	0.3629		0.6371
208174_x_at	ZRSR2	zinc finger (CCCH type), RNA-binding motif and serine/arginine rich 2	0.65529	0.72886	0.073563	0.65305		0.34695
208213_s_at	KCNAB1	potassium voltage-gated channel, shaker-related subfamily, beta member 1	0.70979	0.73772	0.027928	0.56705		0.43295
208247_at	C3ORF51	chromosome 3 open reading frame 51	0.12606	0.72054	0.59449	0.66965		0.33035
208290_s_at	EIF5	eukaryotic translation initiation factor 5	0.74123	0.66431	-0.076925	0.39995		0.60005
208319_s_at	RBM3	RNA binding motif (RNP1, RRM) protein 3	0.85041	0.75554	-0.094868	0.38555		0.61445
208451_s_at	C4A	complement component 4A (Rodgers blood group)	0.73566	0.71179	-0.023874	0.493		0.507
208470_s_at	HP	haptoglobin	0.57276	0.64803	0.075272	0.7		0.3
208471_at	HPR	haptoglobin-related protein	0.79331	0.8634	0.070091	0.7204		0.2796
208534_s_at	RASA4(includesEG:10156)	RAS p21 protein activator 4	0.79456	0.5496	-0.24496	0.22875		0.77125
208581_x_at	MT1X	metallothionein 1X	0.96413	0.81198	-0.15215	0.16365		0.83635
208622_s_at	EZR	ezrin	0.52122	0.70367	0.18244	0.8436		0.1564
208639_x_at	PDIA6	protein disulfide isomerase family A, member 6	0.87576	0.26488	-0.61088	0.02135		0.97865
208641_s_at	RAC1	ras-related C3 botulinum toxin substrate 1 (rho family, small GTP binding protein Rac1)	0.60158	0.69161	0.090024	0.7356		0.2644
208655_at	CCNI	cyclin I	0.031578	0.69038	0.6588	0.95225		0.04775
208672_s_at	SFRS3	splicing factor, arginine/serine-rich 3	0.47935	0.7055	0.22615	0.8776		0.1224
208680_at	PRDX1	peroxiredoxin 1	0.24781	0.6903	0.44249	0.9776		0.0224	0.3
208687_x_at	HSPA8	heat shock 70kDa protein 8	0.73433	0.70496	-0.029368	0.4668		0.5332
208689_s_at	RPN2	ribophorin II	0.75643	0.55292	-0.20351	0.28635		0.71365
208691_at	TFRC	transferrin receptor (p90, CD71)	0.79392	0.76044	-0.033473	0.4449		0.5551
208706_s_at	EIF5	eukaryotic translation initiation factor 5	0.6863	0.80842	0.12212	0.77425		0.22575
208707_at	EIF5	eukaryotic translation initiation factor 5	0.87544	0.80363	-0.071808	0.3678		0.6322
208708_x_at	EIF5	eukaryotic translation initiation factor 5	0.61718	0.70135	0.084162	0.6037		0.3963
208716_s_at	TMCO1	transmembrane and coiled-coil domains 1	0.68322	0.67777	-0.0054516	0.48835		0.51165
208719_s_at	DDX17	DEAD (Asp-Glu-Ala-Asp) box polypeptide 17	0.98913	0.9778	-0.011328	0.3869		0.6131
208724_s_at	RAB1A	RAB1A, member RAS oncogene family	0.37262	0.72051	0.34789	0.80955		0.19045
208727_s_at	CDC42	cell division cycle 42 (GTP binding protein, 25kDa)	0.98488	0.8939	-0.090981	0.0645		0.9355
208729_x_at	HLA-B	major histocompatibility complex, class I, B	0.74627	0.33136	-0.41491	0.0497		0.9503
208733_at	RAB2A	RAB2A, member RAS oncogene family	0.9077	0.95405	0.046349	0.81735		0.18265
208745_at	ATP5L	ATP synthase, H+ transporting, mitochondrial F0 complex, subunit G	0.30379	0.77578	0.47198	0.9332		0.0668
208746_x_at	ATP5L	ATP synthase, H+ transporting, mitochondrial F0 complex, subunit G	0.38579	0.85181	0.46602	0.9331		0.0669
208761_s_at	SUMO1	SMT3 suppressor of mif two 3 homolog 1 (S. cerevisiae)	0.65995	0.71006	0.050106	0.53565		0.46435
208787_at	MRPL3	mitochondrial ribosomal protein L3	0.31292	0.87263	0.55971	0.9212		0.0788
208788_at	ELOVL5	ELOVL family member 5, elongation of long chain fatty acids (FEN1/Elo2, SUR4/Elo3-like, yeast)	0.73264	0.61741	-0.11523	0.315		0.685
208791_at	CLU	clusterin	0.42713	0.76371	0.33658	0.8564		0.1436
208792_s_at	CLU	clusterin	0.27949	0.76764	0.48815	0.9413		0.0587
208800_at	SRP72	signal recognition particle 72kDa	0.74422	0.72168	-0.022533	0.4678		0.5322
208826_x_at	HINT1(includesEG:3094)	histidine triad nucleotide binding protein 1	0.19601	0.77999	0.58399	0.92075		0.07925
208828_at	POLE3	polymerase (DNA directed), epsilon 3 (p17 subunit)	0.47773	0.77355	0.29582	0.7974		0.2026
208832_at	ATXN10	ataxin 10	0.65219	0.8081	0.15591	0.67815		0.32185
208838_at	CAND1	cullin-associated and neddylation-dissociated 1	0.27633	0.70608	0.42975	0.8158		0.1842
208841_s_at	G3BP2	GTPase activating protein (SH3 domain) binding protein 2	0.41151	0.69393	0.28243	0.8034		0.1966
208846_s_at	VDAC3	voltage-dependent anion channel 3	0.47136	0.78653	0.31517	0.81895		0.18105
208847_s_at	ADH5(includesEG:128)	alcohol dehydrogenase 5 (class III), chi polypeptide	0.76627	0.50209	-0.26418	0.0856		0.9144
208857_s_at	PCMT1	protein-L-isoaspartate (D-aspartate) O-methyltransferase	0.51517	0.77525	0.26007	0.8112		0.1888
208866_at	CSNK1A1	casein kinase 1, alpha 1	0.88197	0.39362	-0.48835	0.05245		0.94755
208870_x_at	ATP5C1	ATP synthase, H+ transporting, mitochondrial F1 complex, gamma polypeptide 1	0.12143	0.73697	0.61554	0.9518		0.0482
208886_at	H1F0	H1 histone family, member 0	0.71454	0.3715	-0.34305	0.1918		0.8082
208894_at	HLA-DRA	major histocompatibility complex, class II, DR alpha	0.79734	0.46654	-0.3308	0.0975		0.9025
208898_at	ATP6V1D	ATPase, H+ transporting, lysosomal 34kDa, V1 subunit D	0.21768	0.80042	0.58274	0.89325		0.10675
208910_s_at	C1QBP	complement component 1, q subcomponent binding protein	0.57981	0.86034	0.28053	0.8819		0.1181
208923_at	CYFIP1	cytoplasmic FMR1 interacting protein 1	0.69777	0.58818	-0.10959	0.3407		0.6593
208926_at	NEU1	sialidase 1 (lysosomal sialidase)	0.39278	0.77219	0.3794	0.96445		0.03555
208929_x_at	RPL13	ribosomal protein L13	0.49311	0.71203	0.21892	0.8836		0.1164
208935_s_at	LGALS8	lectin, galactoside-binding, soluble, 8	0.60767	0.76596	0.1583	0.7635		0.2365
208936_x_at	LGALS8	lectin, galactoside-binding, soluble, 8	0.14004	0.79586	0.65582	0.9876		0.0124	0.3
208937_s_at	ID1	inhibitor of DNA binding 1, dominant negative helix-loop-helix protein	0.59197	0.72806	0.1361	0.58505		0.41495
208944_at	TGFBR2	transforming growth factor, beta receptor II (70/80kDa)	0.76777	0.10849	-0.65928	0.0055	0.25	0.9945
208959_s_at	TXNDC4	thioredoxin domain containing 4 (endoplasmic reticulum)	0.52527	0.77957	0.2543	0.92945		0.07055
208961_s_at	KLF6	Kruppel-like factor 6	-0.30755	0.7241	1.0317	0.99905		0.00095	0.15
208966_x_at	IFI16	interferon, gamma-inducible protein 16	0.7018	0.61861	-0.083193	0.34975		0.65025
208980_s_at	UBC	ubiquitin C	0.59853	0.73722	0.1387	0.7443		0.2557
208981_at	PECAM1	platelet/endothelial cell adhesion molecule	0.7101	0.16019	-0.54992	0.04865		0.95135
208982_at	PECAM1	platelet/endothelial cell adhesion molecule	0.77968	0.6492	-0.13048	0.3113		0.6887
208993_s_at	PPIG	peptidylprolyl isomerase G (cyclophilin G)	-0.69945	-0.57817	0.12128	0.69695		0.30305
208996_s_at	POLR2C	polymerase (RNA) II (DNA directed) polypeptide C, 33kDa	0.21141	0.71002	0.49861	0.868		0.132
209009_at	ESD	esterase D/formylglutathione hydrolase	0.077866	0.73247	0.65461	0.9346		0.0654
209022_at	STAG2	stromal antigen 2	0.77708	-0.063519	-0.84059	0.0009	0.15	0.9991
209025_s_at	SYNCRIP	synaptotagmin binding, cytoplasmic RNA interacting protein	0.72286	0.59334	-0.12952	0.3461		0.6539
209031_at	CADM1	cell adhesion molecule 1	0.45895	0.68658	0.22763	0.87365		0.12635
209045_at	XPNPEP1	X-prolyl aminopeptidase (aminopeptidase P) 1, soluble	0.33789	0.76154	0.42365	0.93165		0.06835
209046_s_at	GABARAPL2(includesEG:11345)	GABA(A) receptor-associated protein-like 2	0.5335	0.79766	0.26417	0.6938		0.3062
209047_at	AQP1	aquaporin 1 (Colton blood group)	0.80189	0.18599	-0.6159	0.2		0.8
209060_x_at	NCOA3	nuclear receptor coactivator 3	0.72947	0.01193	-0.71754	0.0179		0.9821
209065_at	UQCRB	ubiquinol-cytochrome c reductase binding protein	0.71413	0.68701	-0.02712	0.4354		0.5646
209066_x_at	UQCRB	ubiquinol-cytochrome c reductase binding protein	0.70072	0.57576	-0.12496	0.36365		0.63635
209068_at	HNRPDL	heterogeneous nuclear ribonucleoprotein D-like	0.71504	0.58599	-0.12906	0.24155		0.75845
209074_s_at	FAM107A	family with sequence similarity 107, member A	0.77533	0.69717	-0.078162	0.2675		0.7325
209075_s_at	ISCU	iron-sulfur cluster scaffold homolog (E. coli)	0.57627	0.73886	0.16259	0.66665		0.33335
209094_at	DDAH1	dimethylarginine dimethylaminohydrolase 1	0.64431	0.75633	0.11202	0.7637		0.2363
209095_at	DLD	dihydrolipoamide dehydrogenase	0.67402	0.78454	0.11052	0.7227		0.2773
209096_at	UBE2V2	ubiquitin-conjugating enzyme E2 variant 2	0.34157	0.76744	0.42587	0.8671		0.1329
209102_s_at	HBP1	HMG-box transcription factor 1	0.73657	0.17739	-0.55918	0.0946		0.9054
209116_x_at	HBB(includesEG:3043)	hemoglobin, beta	0.62143	0.85445	0.23302	0.8116		0.1884
209139_s_at	PRKRA	protein kinase, interferon-inducible double stranded RNA dependent activator	0.69515	0.69822	0.0030689	0.473		0.527
209154_at	TAX1BP3	Tax1 (human T-cell leukemia virus type I) binding protein 3	0.81049	0.64357	-0.16692	0.1645		0.8355
209167_at	GPM6B	glycoprotein M6B	0.73102	0.70017	-0.030849	0.38345		0.61655
209178_at	DHX38	DEAH (Asp-Glu-Ala-His) box polypeptide 38	0.72064	-0.31117	-1.0318	0.0343		0.96825
209183_s_at	C10ORF10	chromosome 10 open reading frame 10	0.96403	0.52339	-0.44064	0.27735		0.72265
209185_s_at	IRS2	insulin receptor substrate 2	0.59913	0.80511	0.20598	0.8799		0.1201
209189_at	FOS	v-fos FBJ murine osteosarcoma viral oncogene homolog	0.95961	0.99676	0.037145	0.75345		0.24655
209191_at	TUBB6	tubulin, beta 6	0.73673	-0.29476	-1.0315	0.00375	0.2	0.99625
209194_at	CETN2	centrin, EF-hand protein, 2	-0.054556	0.71633	0.77089	0.98505		0.01495	0.3
209198_s_at	SYT11	synaptotagmin XI	0.72831	0.55779	-0.17052	0.2582		0.7418
209199_s_at	MEF2C	myocyte enhancer factor 2C	0.62	0.79699	0.17699	0.88725		0.11275
209235_at	CLCN7	chloride channel 7	0.772	0.47281	-0.29919	0.15735		0.84265
209241_x_at	MINK1	misshapen-like kinase 1 (zebrafish)	0.81306	0.61569	-0.19738	0.3013		0.6987
209255_at	KLHDC10	kelch domain containing 10	0.78314	0.89781	0.11466	0.7525		0.2475
209265_s_at	METTL3	methyltransferase like 3	0.69433	0.48217	-0.21216	0.1199		0.8801
209268_at	VPS45	vacuolar protein sorting 45 homolog (S. cerevisiae)	0.56601	0.72773	0.16171	0.71745		0.28255
209274_s_at	ISCA1	iron-sulfur cluster assembly 1 homolog (S. cerevisiae)	0.36027	0.73765	0.37738	0.8542		0.1458
209295_at	TNFRSF10B	tumor necrosis factor receptor superfamily, member 10b	0.54226	0.73955	0.19729	0.75465		0.24535
209300_s_at	NECAP1	NECAP endocytosis associated 1	0.47024	0.71712	0.24689	0.66655		0.33345
209303_at	NDUFS4	NADH dehydrogenase (ubiquinone) Fe-S protein 4, 18kDa (NADH-coenzyme Q reductase)	0.62797	0.78665	0.15868	0.67655		0.32345
209304_x_at	GADD45B	growth arrest and DNA-damage-inducible, beta	0.90331	0.92082	0.017512	0.512		0.488
209315_at	HBS1L	HBS1-like (S. cerevisiae)	0.96121	0.65507	-0.30615	0.15265		0.84735
209332_s_at	MAX	MYC associated factor X	0.90672	0.36202	-0.5447	0.0084	0.25	0.9916
209338_at	TFCP2	transcription factor CP2	0.73282	0.095062	-0.63776	0.00605	0.25	0.99395
209348_s_at	MAF	v-maf musculoaponeurotic fibrosarcoma oncogene homolog (avian)	0.62463	0.68364	0.059011	0.59665		0.40335
209355_s_at	PPAP2B	phosphatidic acid phosphatase type 2B	0.50756	0.75874	0.25118	0.79485		0.20515
209357_at	CITED2	Cbp/p300-interacting transactivator, with Glu/Asp-rich carboxy-terminal domain, 2	0.12924	0.73517	0.60593	0.95945		0.04055
209362_at	MED21	mediator complex subunit 21	0.4898	0.74405	0.25425	0.78085		0.21915
209386_at	TM4SF1	transmembrane 4 L six family member 1	0.93947	0.82776	-0.11171	0.4097		0.5903
209387_s_at	TM4SF1	transmembrane 4 L six family member 1	0.9229	0.4695	-0.45341	0.342		0.658
209391_at	DPM2	dolichyl-phosphate mannosyltransferase polypeptide 2, regulatory subunit	0.072271	0.79103	0.71876	0.98495		0.01505	0.3
209395_at	CHI3L1	chitinase 3-like 1 (cartilage glycoprotein-39)	0.88686	0.66819	-0.21868	0.11885		0.88115
209396_s_at	CHI3L1	chitinase 3-like 1 (cartilage glycoprotein-39)	0.89245	0.5618	-0.33065	0.0967		0.9033
209424_s_at	AMACR	alpha-methylacyl-CoA racemase	0.52008	0.87085	0.35078	0.9862		0.0138	0.3
209425_at	AMACR	alpha-methylacyl-CoA racemase	-0.15081	0.7873	0.93811	0.9996		0.0004	0.1
209426_s_at	AMACR	alpha-methylacyl-CoA racemase	0.43835	0.84129	0.40294	0.99505		0.00495	0.25
209433_s_at	PPAT	phosphoribosyl pyrophosphate amidotransferase	0.79478	0.72181	-0.072968	0.3629		0.6371
209440_at	PRPS1	phosphoribosyl pyrophosphate synthetase 1	0.49463	0.81471	0.32008	0.7906		0.2094
209445_x_at	C7ORF44	chromosome 7 open reading frame 44	0.24291	0.80234	0.55943	0.9775		0.0225	0.3
209452_s_at	VTI1B	vesicle transport through interaction with t-SNAREs homolog 1B (yeast)	0.52012	0.71354	0.19341	0.71485		0.28515
209458_x_at	HBA1	hemoglobin, alpha 1	0.59273	0.71691	0.12418	0.69705		0.30295
209472_at	CCBL2	cysteine conjugate-beta lyase 2	0.71257	0.87165	0.15908	0.8505		0.1495
209477_at	EMD	emerin	0.35132	0.7066	0.35529	0.8439		0.1561
209507_at	RPA3	replication protein A3, 14kDa	0.51234	0.76799	0.25565	0.76985		0.23015
209531_at	GSTZ1	glutathione transferase zeta 1	0.19935	0.73737	0.53802	0.88545		0.1149
209538_at	ZNF32	zinc finger protein 32	0.46106	0.80075	0.33969	0.7177		0.2823
209540_at	IGF1	insulin-like growth factor 1 (somatomedin C)	0.77069	0.7735	0.0028152	0.58375		0.41625
209541_at	IGF1	insulin-like growth factor 1 (somatomedin C)	0.7345	0.61112	-0.12338	0.2889		0.7111
209550_at	NDN	necdin homolog (mouse)	0.3324	0.70211	0.36971	0.83725		0.16275
209569_x_at	D4S234E	DNA segment on chromosome 4 (unique) 234 expressed sequence	0.60747	0.84701	0.23954	0.89775		0.10225
209578_s_at	POFUT2	protein O-fucosyltransferase 2	0.33223	0.74959	0.41736	0.82		0.18
209598_at	PNMA2	paraneoplastic antigen MA2	0.083394	0.71652	0.63312	0.8538		0.1462
209607_x_at	SULT1A3	sulfotransferase family, cytosolic, 1A, phenol-preferring, member 3	0.50071	0.73131	0.2306	0.8345		0.1655
209608_s_at	ACAT2	acetyl-Coenzyme A acetyltransferase 2	0.32936	0.79205	0.4627	0.9308		0.0692
209619_at	CD74	CD74 molecule, major histocompatibility complex, class II invariant chain	0.70659	0.46025	-0.24635	0.1828		0.8172
209625_at	PIGH	phosphatidylinositol glycan anchor biosynthesis, class H	0.55074	0.75675	0.20601	0.76915		0.23085
209632_at	PPP2R3A(includesEG:5523)	protein phosphatase 2 (formerly 2A), regulatory subunit B'', alpha	0.25708	0.80444	0.54737	0.9931		0.0069	0.25
209657_s_at	HSF2	heat shock transcription factor 2	0.72995	0.49708	-0.23288	0.172		0.828
209667_at	CES2(includesEG:8824)	carboxylesterase 2 (intestine, liver)	0.71696	0.43136	-0.2856	0.1413		0.8587
209674_at	CRY1	cryptochrome 1 (photolyase-like)	0.72224	0.43328	-0.28895	0.2067		0.7933
209694_at	PTS	6-pyruvoyltetrahydropterin synthase	0.31346	0.72209	0.40863	0.91755		0.08245
209699_x_at	AKR1C2	aldo-keto reductase family 1, member C2 (dihydrodiol dehydrogenase 2; bile acid binding protein; 3-alpha hydroxysteroid dehydrogenase, type III)	0.74021	0.47903	-0.26118	0.15235		0.84765
209700_x_at	PDE4DIP	phosphodiesterase 4D interacting protein	0.55754	0.75375	0.19621	0.82405		0.17595
209723_at	SERPINB9	serpin peptidase inhibitor, clade B (ovalbumin), member 9	0.71206	0.83955	0.12748	0.8131		0.1869
209732_at	CLEC2B	C-type lectin domain family 2, member B	0.27509	0.82133	0.54625	0.85175		0.14825
209733_at	LOC286440	hypothetical protein LOC286440	0.396	0.70354	0.30754	0.80845		0.1916
209737_at	MAGI2	membrane associated guanylate kinase, WW and PDZ domain containing 2	0.68458	0.47969	-0.20489	0.22535		0.77465
209747_at	TGFB3	transforming growth factor, beta 3	0.55262	0.83421	0.28159	0.69125		0.30875
209750_at	NR1D2	nuclear receptor subfamily 1, group D, member 2	0.80097	0.66574	-0.13524	0.235		0.765
209782_s_at	DBP	D site of albumin promoter (albumin D-box) binding protein	0.70415	0.31881	-0.38533	0.03215		0.96785
209786_at	HMGN4	high mobility group nucleosomal binding domain 4	0.45058	0.76208	0.3115	0.84115		0.15885
209788_s_at	ERAP1	endoplasmic reticulum aminopeptidase 1	0.57236	0.87236	0.3	0.8783		0.1217
209797_at	CNPY2	canopy 2 homolog (zebrafish)	0.81472	0.88252	0.067804	0.73785		0.26215
209824_s_at	ARNTL	aryl hydrocarbon receptor nuclear translocator-like	0.51303	0.68895	0.17593	0.85085		0.14915
209861_s_at	METAP2(includesEG:10988)	methionyl aminopeptidase 2	0.73348	0.28058	-0.4529	0.0311		0.9689
209875_s_at	SPP1	secreted phosphoprotein 1	0.6865	0.3711	-0.31541	0.09435		0.90565
209879_at	SELPLG	selectin P ligand	0.88988	0.89637	0.0064841	0.50785		0.49215
209900_s_at	SLC16A1	solute carrier family 16, member 1 (monocarboxylic acid transporter 1)	0.71767	0.6712	-0.046469	0.3181		0.6819
209915_s_at	NRXN1	neurexin 1	0.54704	0.69815	0.15111	0.68075		0.31925
209939_x_at	CFLAR	CASP8 and FADD-like apoptosis regulator	0.38293	0.7183	0.33537	0.93105		0.06895
209967_s_at	CREM	cAMP responsive element modulator	0.68675	0.72381	0.037055	0.594		0.406
209975_at	CYP2E1	cytochrome P450, family 2, subfamily E, polypeptide 1	0.73984	0.73664	-0.0031966	0.48665		0.51335
209988_s_at	ASCL1	achaete-scute complex homolog 1 (Drosophila)	0.83006	0.18101	-0.64906	0.0169		0.9831
209992_at	PFKFB2	6-phosphofructo-2-kinase/fructose-2,6-biphosphatase 2	0.066313	0.75043	0.68412	0.98515		0.01485	0.3
210075_at	2009-03-02	membrane-associated ring finger (C3HC4) 2	0.71617	0.72204	0.0058656	0.5197		0.4803
210090_at	ARC	activity-regulated cytoskeleton-associated protein	0.63585	0.88979	0.25394	0.85175		0.14825
210091_s_at	DTNA	dystrobrevin, alpha	0.85204	-0.22043	-1.0725	0.0333		0.9667
210095_s_at	IGFBP3	insulin-like growth factor binding protein 3	0.80393	0.33833	-0.4656	0.0988		0.9012
210147_at	ART3	ADP-ribosyltransferase 3	-0.035595	0.80875	0.84435	0.9748		0.0252
210156_s_at	PCMT1	protein-L-isoaspartate (D-aspartate) O-methyltransferase	0.68676	0.68722	0.00046244	0.49045		0.50955
210172_at	SF1	splicing factor 1	0.4973	0.84273	0.34544	0.8935		0.1065
210211_s_at	HSP90AA1	heat shock protein 90kDa alpha (cytosolic), class A member 1	0.34823	0.76823	0.42	0.8785		0.1215
210225_x_at	LILRB3(includesEG:11025)	leukocyte immunoglobulin-like receptor, subfamily B (with TM and ITIM domains), member 3	0.69439	-0.010681	-0.70507	0.02515		0.97485
210230_at	LOC728965	similar to hCG1749101	0.92652	0.87333	-0.05319	0.11985		0.88015
210232_at	CDC42	cell division cycle 42 (GTP binding protein, 25kDa)	0.4898	0.71633	0.22653	0.71735		0.28265
210247_at	SYN2	synapsin II	0.65953	0.78916	0.12963	0.70195		0.29805
210266_s_at	TRIM33	tripartite motif-containing 33	0.85181	0.59898	-0.25283	0.1939		0.8061
210268_at	NFX1	nuclear transcription factor, X-box binding 1	0.85045	0.57911	-0.27135	0.15245		0.84755
210281_s_at	ZMYM2	zinc finger, MYM-type 2	0.71138	-0.21497	-0.92635	0.00035	0.15	0.99965
210282_at	ZMYM2	zinc finger, MYM-type 2	0.73709	0.44295	-0.29414	0.22445		0.77555
210305_at	PDE4DIP	phosphodiesterase 4D interacting protein	0.87544	0.85428	-0.02116	0.43665		0.56335
210312_s_at	IFT20	intraflagellar transport 20 homolog (Chlamydomonas)	0.71199	0.41995	-0.29204	0.1543		0.8457
210338_s_at	HSPA8	heat shock 70kDa protein 8	0.65288	0.72243	0.069546	0.59705		0.40295
210396_s_at	BOLA2	bolA homolog 2 (E. coli)	0.89266	0.93262	0.03996	0.6928		0.3072
210406_s_at	RAB6A	RAB6A, member RAS oncogene family	0.37388	0.69712	0.32325	0.86935		0.13065
210414_at	FLRT1	fibronectin leucine rich transmembrane protein 1	0.67946	0.77635	0.096894	0.81015		0.18985
210512_s_at	VEGFA	vascular endothelial growth factor A	0.96033	0.71526	-0.24507	0.16485		0.83515
210513_s_at	VEGFA	vascular endothelial growth factor A	0.86816	-0.16519	-1.0333	0.01505		0.985
210517_s_at	AKAP12	A kinase (PRKA) anchor protein 12	0.6982	0.56571	-0.13249	0.2397		0.7603
210519_s_at	NQO1	NAD(P)H dehydrogenase, quinone 1	0.59044	0.77192	0.18149	0.7421		0.2579
210580_x_at	SULT1A3	sulfotransferase family, cytosolic, 1A, phenol-preferring, member 3	0.56453	0.78366	0.21912	0.93285		0.06715
210588_x_at	HNRNPH3	heterogeneous nuclear ribonucleoprotein H3 (2H9)	0.72869	0.3882	-0.34049	0.085		0.915
210592_s_at	SAT1	spermidine/spermine N1-acetyltransferase 1	0.8464	0.3075	-0.53891	0.0056	0.25	0.9944
210600_s_at	GRK4	G protein-coupled receptor kinase 4	0.55586	0.83194	0.27609	0.84275		0.15725
210611_s_at	DTNA	dystrobrevin, alpha	0.87472	-0.18905	-1.0638	0.0363		0.9637
210621_s_at	RASA1	RAS p21 protein activator (GTPase activating protein) 1	0.709	0.71662	0.0076239	0.50985		0.49015
210639_s_at	ATG5	ATG5 autophagy related 5 homolog (S. cerevisiae)	0.48093	0.72061	0.23968	0.79385		0.20615
210645_s_at	TTC3	tetratricopeptide repeat domain 3	0.20019	0.77739	0.5772	0.95775		0.04225
210648_x_at	SNX3	sorting nexin 3	0.30048	0.73898	0.4385	0.91885		0.08115
210672_s_at	C16ORF35	chromosome 16 open reading frame 35	0.8392	0.53428	-0.30492	0.02065		0.97935
210691_s_at	CACYBP	calcyclin binding protein	0.47604	0.7351	0.25906	0.78355		0.21645
210701_at	CFDP1	craniofacial development protein 1	0.45733	0.70924	0.25191	0.9069		0.0931
210707_x_at	PMS2L11	postmeiotic segregation increased 2-like 11 pseudogene	-0.084997	0.71186	0.79685	0.9924		0.0076	0.25
210718_s_at	ARL17P1	ADP-ribosylation factor-like 17 pseudogene 1	0.74986	0.96091	0.21105	0.9343		0.06595
210732_s_at	LGALS8	lectin, galactoside-binding, soluble, 8	0.58286	0.67613	0.093271	0.69445		0.30555
210800_at	TIMM8A	translocase of inner mitochondrial membrane 8 homolog A (yeast)	0.56983	0.73516	0.16533	0.65895		0.34105
210829_s_at	SSBP2	single-stranded DNA binding protein 2	0.23752	0.76945	0.53193	0.9682		0.0318
210835_s_at	CTBP2	C-terminal binding protein 2	0.71559	0.5731	-0.14249	0.1936		0.8064
210910_s_at	POMZP3	POM (POM121 homolog, rat) and ZP3 fusion	0.9038	0.92166	0.017858	0.6362		0.3638
210927_x_at	JTB	jumping translocation breakpoint	0.04077	0.69957	0.6588	0.95525		0.04475
210949_s_at	EIF3C	eukaryotic translation initiation factor 3, subunit C	0.82691	0.69334	-0.13357	0.24385		0.75615
210968_s_at	RTN4	reticulon 4	0.64545	0.74775	0.1023	0.62135		0.37865
211023_at	PDHB	pyruvate dehydrogenase (lipoamide) beta	0.31248	0.7969	0.48443	0.9987		0.0013	0.2
211033_s_at	PEX7	peroxisomal biogenesis factor 7	0.45571	0.83994	0.38423	0.9441		0.0559
211038_s_at	MGC12760	ciliary rootlet coiled-coil, rootletin-like 1	0.83932	0.71574	-0.12358	0.25585		0.74415
211135_x_at	LILRB3(includesEG:11025)	leukocyte immunoglobulin-like receptor, subfamily B (with TM and ITIM domains), member 3	0.76312	0.12221	-0.64091	0.00595	0.25	0.99405
211143_x_at	NR4A1	nuclear receptor subfamily 4, group A, member 1	0.096451	0.88912	0.79267	0.80615		0.19385
211149_at	UTY	ubiquitously transcribed tetratricopeptide repeat gene, Y-linked	-0.068683	0.72356	0.79224	0.96955		0.03045
211200_s_at	EFCAB2	EF-hand calcium binding domain 2	-0.091703	0.74798	0.83968	0.997		0.003	0.25
211302_s_at	PDE4B	phosphodiesterase 4B, cAMP-specific (phosphodiesterase E4 dunce homolog, Drosophila)	0.71964	0.42273	-0.29691	0.17235		0.82765
211318_s_at	RAE1	RAE1 RNA export 1 homolog (S. pombe)	0.52786	0.79391	0.26605	0.8039		0.1961
211423_s_at	SC5DL	sterol-C5-desaturase (ERG3 delta-5-desaturase homolog, S. cerevisiae)-like	0.32685	0.82012	0.49327	0.96855		0.03145
211456_x_at	MT1P2	metallothionein 1 pseudogene 2	0.82259	0.65981	-0.16278	0.2304		0.7696
211509_s_at	RTN4	reticulon 4	0.52553	0.72834	0.2028	0.8357		0.1643
211514_at	RIPK5	dual serine/threonine and tyrosine protein kinase	-0.15635	0.81238	0.96873	0.84985		0.1521
211534_x_at	PTPRN2	protein tyrosine phosphatase, receptor type, N polypeptide 2	0.73791	0.57966	-0.15825	0.21325		0.78675
211552_s_at	ALDH4A1	aldehyde dehydrogenase 4 family, member A1	0.71912	0.23719	-0.48193	0.1003		0.8997
211568_at	BAI3	brain-specific angiogenesis inhibitor 3	0.85728	0.83247	-0.02481	0.42495		0.57505
211575_s_at	UBE3A	ubiquitin protein ligase E3A	0.40177	0.75987	0.3581	0.7771		0.2229
211586_s_at	ATP2B2	ATPase, Ca++ transporting, plasma membrane 2	0.75828	0.37678	-0.3815	0.24465		0.75535
211594_s_at	MRPL9	mitochondrial ribosomal protein L9	0.80437	0.61255	-0.19182	0.2605		0.7395
211600_at	PTPRO	protein tyrosine phosphatase, receptor type, O	0.78057	0.59335	-0.18722	0.18635		0.81365
211658_at	PRDX2	peroxiredoxin 2	0.32901	0.75951	0.4305	0.9012		0.0988
211663_x_at	PTGDS	prostaglandin D2 synthase 21kDa (brain)	0.75261	0.66978	-0.082832	0.28545		0.71455
211696_x_at	HBB(includesEG:3043)	hemoglobin, beta	0.49293	0.85659	0.36366	0.9338		0.0662
211699_x_at	HBA1	hemoglobin, alpha 1	0.54223	0.72106	0.17884	0.78835		0.21165
211704_s_at	SPIN2B	spindlin family, member 2B	0.26372	0.78723	0.52352	0.9424		0.0576
211727_s_at	COX11	COX11 homolog, cytochrome c oxidase assembly protein (yeast)	0.87353	0.5375	-0.33603	0.02925		0.97075
211742_s_at	EVI2B	ecotropic viral integration site 2B	0.78062	0.61912	-0.1615	0.1745		0.8255
211745_x_at	HBA1	hemoglobin, alpha 1	0.5591	0.75689	0.19779	0.79335		0.20665
211751_at	PDE4DIP	phosphodiesterase 4D interacting protein	0.5383	0.85635	0.31805	0.92235		0.07765
211755_s_at	ATP5F1	ATP synthase, H+ transporting, mitochondrial F0 complex, subunit B1	0.80656	0.55903	-0.24753	0.226		0.774
211758_x_at	TXNDC9	thioredoxin domain containing 9	0.63564	0.73504	0.099401	0.6151		0.3849
211764_s_at	UBE2D1	ubiquitin-conjugating enzyme E2D 1 (UBC4/5 homolog, yeast)	0.31745	0.70037	0.38292	0.88025		0.11975
211795_s_at	FYB	FYN binding protein (FYB-120/130)	0.28686	0.69571	0.40885	0.94285		0.0572
211894_x_at	SEZ6L	seizure related 6 homolog (mouse)-like	0.20917	0.70256	0.49339	0.9312		0.0688
211911_x_at	HLA-B	major histocompatibility complex, class I, B	0.7081	0.61909	-0.089006	0.33875		0.66125
211936_at	HSPA5	heat shock 70kDa protein 5 (glucose-regulated protein, 78kDa)	0.79793	0.90114	0.10321	0.72305		0.27695
211948_x_at	BAT2D1	BAT2 domain containing 1	0.62816	0.83214	0.20398	0.8817		0.1183
211969_at	HSP90AA1	heat shock protein 90kDa alpha (cytosolic), class A member 1	0.11268	0.72546	0.61278	0.99415		0.00585	0.25
211985_s_at	CALM3	calmodulin 3 (phosphorylase kinase, delta)	0.54017	0.76828	0.22811	0.6986		0.3014
211990_at	HLA-DPA1	major histocompatibility complex, class II, DP alpha 1	0.60862	0.6908	0.082174	0.60145		0.39855
211992_at	WNK1	WNK lysine deficient protein kinase 1	0.54622	0.78288	0.23667	0.79875		0.20125
211998_at	H3F3A(includesEG:3020)	H3 histone, family 3A	0.91611	0.26949	-0.64662	0.09555		0.90445
211999_at	H3F3A(includesEG:3020)	H3 histone, family 3A	0.74761	0.6224	-0.12521	0.3047		0.6953
212010_s_at	CDV3	CDV3 homolog (mouse)	0.4005	0.83867	0.43818	0.96315		0.03685
212019_at	RSL1D1	ribosomal L1 domain containing 1	0.73725	0.68448	-0.052767	0.2692		0.7308
212027_at	RBM25(includesEG:58517)	RNA binding motif protein 25	0.61475	0.75266	0.13791	0.6928		0.3072
212028_at	RBM25(includesEG:58517)	RNA binding motif protein 25	0.72558	0.47803	-0.24755	0.2573		0.7427
212036_s_at	PNN	pinin, desmosome associated protein	0.7507	0.098551	-0.65215	0.00185	0.2	0.99815
212038_s_at	VDAC1	voltage-dependent anion channel 1	0.61313	0.83701	0.22389	0.7613		0.2387
212040_at	TGOLN2(includesEG:10618)	trans-golgi network protein 2	0.47637	0.92832	0.45195	0.99835		0.00165	0.2
212043_at	TGOLN2(includesEG:10618)	trans-golgi network protein 2	0.49479	0.77904	0.28425	0.9543		0.0457
212055_at	C18ORF10	chromosome 18 open reading frame 10	0.40027	0.81229	0.41202	0.9491		0.0509
212063_at	CD44	CD44 molecule (Indian blood group)	0.88272	0.4998	-0.38291	0.17345		0.82655
212066_s_at	USP34(includesEG:9736)	ubiquitin specific peptidase 34	0.69362	0.19875	-0.49486	0.03975		0.96025
212099_at	RHOB	ras homolog gene family, member B	0.70595	0.57508	-0.13086	0.30455		0.69545
212110_at	SLC39A14	solute carrier family 39 (zinc transporter), member 14	0.86804	0.093851	-0.77419	0.1949		0.8051
212116_at	TRIM27	tripartite motif-containing 27	0.69288	0.39807	-0.29482	0.1576		0.8424
212145_at	MRPS27	mitochondrial ribosomal protein S27	0.61654	0.91908	0.30253	0.9714		0.0286
212158_at	SDC2	syndecan 2	0.23679	0.70627	0.46948	0.94415		0.05585
212164_at	TMEM183A	transmembrane protein 183A	0.69947	0.84605	0.14658	0.8112		0.1888
212168_at	CPNE1	copine I	0.86565	0.44441	-0.42125	0.0178		0.9822
212171_x_at	VEGFA	vascular endothelial growth factor A	0.89007	0.54867	-0.34141	0.29025		0.70975
212172_at	AK2	adenylate kinase 2	0.70415	-0.083856	-0.78801	0.1119		0.8881
212182_at	NUDT4	nudix (nucleoside diphosphate linked moiety X)-type motif 4	0.73798	0.53267	-0.20531	0.2112		0.7888
212183_at	NUDT4	nudix (nucleoside diphosphate linked moiety X)-type motif 4	0.72357	-0.098777	-0.82235	0.023		0.977
212185_x_at	MT2A	metallothionein 2A	0.96684	0.59141	-0.37543	0.02525		0.97475
212199_at	MRFAP1L1	Morf4 family associated protein 1-like 1	0.51553	0.72646	0.21093	0.6747		0.3253
212203_x_at	IFITM3	interferon induced transmembrane protein 3 (1-8U)	0.69544	0.77053	0.075088	0.5436		0.4564
212215_at	PREPL	prolyl endopeptidase-like	-0.047509	0.736	0.78351	0.9808		0.0192	0.3
212224_at	ALDH1A1	aldehyde dehydrogenase 1 family, member A1	0.77951	0.4691	-0.31041	0.07545		0.92455
212226_s_at	PPAP2B	phosphatidic acid phosphatase type 2B	0.52119	0.74212	0.22093	0.8368		0.1632
212239_at	PIK3R1	phosphoinositide-3-kinase, regulatory subunit 1 (alpha)	0.54371	0.73599	0.19228	0.76915		0.23085
212259_s_at	PBXIP1	pre-B-cell leukemia homeobox interacting protein 1	0.47354	0.83588	0.36234	0.9446		0.0554
212263_at	QKI	quaking homolog, KH domain RNA binding (mouse)	0.75782	0.61447	-0.14334	0.2373		0.7627
212274_at	LPIN1	lipin 1	0.70777	0.29294	-0.41483	0.12545		0.87455
212285_s_at	AGRN	agrin	0.73036	0.20389	-0.52647	0.07225		0.92775
212290_at	SLC7A1	solute carrier family 7 (cationic amino acid transporter, y+ system), member 1	0.57909	0.79714	0.21805	0.868		0.132
212313_at	CHMP7	CHMP family, member 7	0.25031	0.68323	0.43292	0.96635		0.03365
212314_at	SERINC2	serine incorporator 2	0.72468	0.42687	-0.29781	0.06405		0.93595
212382_at	TCF4	transcription factor 4	0.66261	0.81762	0.15501	0.8031		0.1969
212405_s_at	KIAA0859	KIAA0859	0.76423	0.34741	-0.41681	0.147		0.853
212406_s_at	PCMTD2	protein-L-isoaspartate (D-aspartate) O-methyltransferase domain containing 2	0.70678	0.17225	-0.53453	0.03015		0.96985
212411_at	IMP4	IMP4, U3 small nucleolar ribonucleoprotein, homolog (yeast)	0.38218	0.77083	0.38865	0.98765		0.01235	0.3
212434_at	GRPEL1	GrpE-like 1, mitochondrial (E. coli)	0.18561	0.70784	0.52223	0.89915		0.10085
212435_at	TRIM33	tripartite motif-containing 33	0.71825	0.17952	-0.53873	0.07415		0.92585
212440_at	SNRNP27	small nuclear ribonucleoprotein 27kDa (U4/U6.U5)	0.2956	0.72404	0.42844	0.963		0.037
212453_at	KIAA1279	KIAA1279	0.11324	0.7372	0.62395	0.8648		0.1352
212460_at	C14ORF147	chromosome 14 open reading frame 147	0.7877	-0.21119	-0.99889	0.0219		0.9781
212463_at	CD59	CD59 molecule, complement regulatory protein	0.75668	0.65525	-0.10143	0.3067		0.6933
212475_at	AVL9	AVL9 homolog (S. cerevisiase)	0.668	0.64211	-0.025887	0.4367		0.5633
212490_at	DNAJC8	DnaJ (Hsp40) homolog, subfamily C, member 8	0.40317	0.78033	0.37716	0.81825		0.18175
212494_at	TENC1	tensin like C1 domain containing phosphatase (tensin 2)	0.7038	0.66409	-0.039714	0.51615		0.48385
212502_at	ADO	2-aminoethanethiol (cysteamine) dioxygenase	0.38681	0.73598	0.34916	0.92635		0.07365
212503_s_at	DIP2C	DIP2 disco-interacting protein 2 homolog C (Drosophila)	0.74179	0.30163	-0.44016	0.1819		0.8181
212508_at	MOAP1	modulator of apoptosis 1	0.28383	0.74898	0.46515	0.8628		0.1372
212557_at	ZNF451	zinc finger protein 451	0.79885	0.20078	-0.59807	0.12905		0.87095
212560_at	SORL1	sortilin-related receptor, L(DLR class) A repeats-containing	0.31246	0.83821	0.52574	0.9878		0.0122	0.3
212566_at	MAP4	microtubule-associated protein 4	0.74942	0.56291	-0.18651	0.1545		0.8455
212568_s_at	DLAT	dihydrolipoamide S-acetyltransferase	0.56601	0.71153	0.14552	0.6853		0.3147
212570_at	ENDOD1	endonuclease domain containing 1	0.81077	0.79841	-0.012355	0.2777		0.7223
212593_s_at	PDCD4	programmed cell death 4 (neoplastic transformation inhibitor)	0.74075	0.35189	-0.38886	0.05525		0.94475
212600_s_at	UQCRC2	ubiquinol-cytochrome c reductase core protein II	0.41178	0.77068	0.35889	0.76795		0.23205
212607_at	AKT3	v-akt murine thymoma viral oncogene homolog 3 (protein kinase B, gamma)	0.17179	0.73334	0.56155	0.93175		0.06825
212624_s_at	CHN1(includesEG:1123)	chimerin (chimaerin) 1	-0.34739	0.71306	1.0604	0.99905		0.00095	0.15
212631_at	STX7	syntaxin 7	0.73399	0.48787	-0.24612	0.19415		0.80585
212632_at	STX7	syntaxin 7	0.74457	0.276	-0.46856	0.11605		0.88395
212643_at	MAPK1IP1L	mitogen-activated protein kinase 1 interacting protein 1-like	0.6838	0.74627	0.062466	0.65065		0.34935
212644_s_at	MAPK1IP1L	mitogen-activated protein kinase 1 interacting protein 1-like	0.82632	0.26773	-0.55858	0.07005		0.92995
212652_s_at	SNX4	sorting nexin 4	0.44798	0.73064	0.28265	0.885		0.115
212655_at	ZCCHC14	zinc finger, CCHC domain containing 14	0.28213	0.71943	0.4373	0.88595		0.11405
212658_at	LHFPL2	lipoma HMGIC fusion partner-like 2	0.697	0.020399	-0.6766	0.0658		0.9342
212665_at	TIPARP	TCDD-inducible poly(ADP-ribose) polymerase	0.90935	0.038902	-0.87045	0.0084	0.25	0.9916
212687_at	LIMS1	LIM and senescent cell antigen-like domains 1	0.84206	0.13609	-0.70597	0.09825		0.90175
212689_s_at	JMJD1A	jumonji domain containing 1A	0.3595	0.69324	0.33373	0.91665		0.08335
212690_at	DDHD2	DDHD domain containing 2	0.74729	0.59253	-0.15476	0.294		0.706
212696_s_at	RNF4	ring finger protein 4	0.71265	-0.13507	-0.84773	0.0559		0.9441
212707_s_at	RASA4(includesEG:10156)	RAS p21 protein activator 4	0.76955	0.39618	-0.37338	0.08785		0.91215
212712_at	CAMSAP1	calmodulin regulated spectrin-associated protein 1	0.27535	0.74398	0.46863	0.93705		0.06295
212718_at	PAPOLA	poly(A) polymerase alpha	0.87117	0.11693	-0.75423	0.001	0.2	0.999
212719_at	PHLPP	PH domain and leucine rich repeat protein phosphatase	0.86518	-0.16497	-1.0302	0.0001	0.05	0.9999
212720_at	PAPOLA	poly(A) polymerase alpha	0.74093	-0.075154	-0.81609	0.00555	0.25	0.99445
212724_at	RND3	Rho family GTPase 3	0.62834	0.84632	0.21798	0.8326		0.1674
212729_at	DLG3	discs, large homolog 3 (Drosophila)	0.29461	0.7485	0.45389	0.90425		0.09575
212740_at	PIK3R4	phosphoinositide-3-kinase, regulatory subunit 4	0.083264	0.82668	0.74341	0.9537		0.0463
212749_s_at	RCHY1	ring finger and CHY zinc finger domain containing 1	0.72289	0.72505	0.0021603	0.51145		0.48855
212751_at	UBE2N	ubiquitin-conjugating enzyme E2N (UBC13 homolog, yeast)	0.39816	0.85766	0.4595	0.83185		0.16815
212796_s_at	TBC1D2B	TBC1 domain family, member 2B	0.28881	0.81517	0.52636	0.7649		0.2351
212817_at	DNAJB5	DnaJ (Hsp40) homolog, subfamily B, member 5	0.18277	0.77847	0.5957	0.9615		0.03905
212845_at	SAMD4A	sterile alpha motif domain containing 4A	0.90094	0.68216	-0.21878	0.25315		0.74685
212850_s_at	LRP4	low density lipoprotein receptor-related protein 4	0.73752	0.75307	0.015548	0.50285		0.49715
212859_x_at	MT1E	metallothionein 1E	0.84725	0.67572	-0.17152	0.22335		0.77665
212872_s_at	MED20	mediator complex subunit 20	0.69481	0.35118	-0.34363	0.0991		0.9009
212887_at	SEC23A	Sec23 homolog A (S. cerevisiae)	0.47183	0.85991	0.38809	0.97855		0.02145	0.3
212902_at	SEC24A	SEC24 family, member A (S. cerevisiae)	0.85922	0.33668	-0.52254	0.15335		0.84665
212923_s_at	C6ORF145	chromosome 6 open reading frame 145	0.74454	0.33162	-0.41293	0.16285		0.83715
212946_at	KIAA0564	KIAA0564	0.84736	0.22147	-0.62589	0.0347		0.9653
212950_at	GPR116	G protein-coupled receptor 116	0.8302	0.70798	-0.12222	0.3028		0.6972
212951_at	GPR116	G protein-coupled receptor 116	0.87091	0.68046	-0.19045	0.219		0.781
212956_at	TBC1D9	TBC1 domain family, member 9 (with GRAM domain)	0.43008	0.82123	0.39114	0.86235		0.13765
212959_s_at	GNPTAB	N-acetylglucosamine-1-phosphate transferase, alpha and beta subunits	-0.13441	0.68439	0.8188	0.9991		0.0009	0.15
212967_x_at	NAP1L1	nucleosome assembly protein 1-like 1	0.46198	0.80719	0.34521	0.95125		0.04875
212987_at	FBXO9	F-box protein 9	-0.02722	0.77444	0.80167	0.9929		0.0071	0.25
212990_at	SYNJ1	synaptojanin 1	0.12337	0.69885	0.57547	0.94565		0.05435
212991_at	FBXO9	F-box protein 9	0.8735	0.52863	-0.34486	0.07345		0.92655
212995_x_at	FAM128B	family with sequence similarity 128, member B	0.28352	0.79479	0.51126	0.8846		0.1154
213005_s_at	KANK1	KN motif and ankyrin repeat domains 1	0.79347	0.55153	-0.24194	0.176		0.824
213013_at	MAPK8IP1	mitogen-activated protein kinase 8 interacting protein 1	0.25344	0.69554	0.4421	0.88775		0.11225
213016_at	BBX	bobby sox homolog (Drosophila)	0.65977	0.341	-0.31877	0.06505		0.93495
213038_at	RNF19B	ring finger protein 19B	0.75577	0.0054671	-0.7503	0.12875		0.87125
213040_s_at	NPTXR	neuronal pentraxin receptor	0.75211	-0.077222	-0.82934	0.01295		0.98705
213055_at	CD47	CD47 molecule	0.72962	0.56842	-0.1612	0.30095		0.69905
213108_at	CAMK2A	calcium/calmodulin-dependent protein kinase II alpha	0.85456	0.83265	-0.021909	0.4025		0.5975
213118_at	UHRF1BP1L	UHRF1 binding protein 1-like	0.53498	0.72205	0.18707	0.8756		0.1244
213122_at	TSPYL5	TSPY-like 5	0.60544	0.73024	0.1248	0.6178		0.3822
213145_at	FBXL14	F-box and leucine-rich repeat protein 14	0.70874	0.7061	-0.0026446	0.4819		0.5181
213151_s_at	2009-09-07	septin 7	0.80516	0.42897	-0.37619	0.02625		0.97375
213155_at	WSCD1	WSC domain containing 1	0.79632	0.40138	-0.39495	0.04085		0.95915
213165_at	CEP350	centrosomal protein 350kDa	0.69979	0.41535	-0.28444	0.142		0.858
213168_at	SP3	Sp3 transcription factor	0.34961	0.70193	0.35232	0.91455		0.08545
213187_x_at	FTL	ferritin, light polypeptide	0.81399	0.24458	-0.56941	0.0031	0.2	0.9969
213190_at	COG7	component of oligomeric golgi complex 7	0.58642	0.70615	0.11973	0.74735		0.25265
213195_at	LOC201229	hypothetical protein LOC201229	0.1452	0.88292	0.73772	0.9983		0.0017	0.2
213198_at	ACVR1B	activin A receptor, type IB	0.27312	0.73087	0.45775	0.9488		0.0512
213218_at	ZNF187	zinc finger protein 187	0.81631	-0.18519	-1.0015	0.0181		0.9819
213229_at	DICER1	dicer 1, ribonuclease type III	0.4777	0.75809	0.28039	0.6595		0.3405
213233_s_at	KLHL9	kelch-like 9 (Drosophila)	0.77808	-0.069519	-0.84759	0.013		0.987
213237_at	C16ORF88	chromosome 16 open reading frame 88	0.82193	0.38944	-0.43249	0.24885		0.75115
213241_at	PLXNC1	plexin C1	-0.020549	0.8175	0.83805	0.9367		0.0633
213270_at	MPP2	membrane protein, palmitoylated 2 (MAGUK p55 subfamily member 2)	0.49105	0.75397	0.26292	0.754		0.246
213274_s_at	CTSB	cathepsin B	0.38797	0.8568	0.46884	0.98645		0.01355	0.3
213279_at	DHRS1	dehydrogenase/reductase (SDR family) member 1	0.71175	0.79946	0.087707	0.6876		0.3124
213280_at	GARNL4	GTPase activating Rap/RanGAP domain-like 4	0.053246	0.70424	0.65099	0.9012		0.0988
213283_s_at	SALL2	sal-like 2 (Drosophila)	0.76937	0.35324	-0.41614	0.02965		0.97035
213291_s_at	UBE3A	ubiquitin protein ligase E3A	0.73291	0.3934	-0.3395	0.21725		0.78275
213293_s_at	TRIM22	tripartite motif-containing 22	0.67021	0.89591	0.22571	0.92715		0.07285
213326_at	VAMP1	vesicle-associated membrane protein 1 (synaptobrevin 1)	0.6329	0.83398	0.20108	0.8817		0.1183
213357_at	GTF2H5	general transcription factor IIH, polypeptide 5	0.68936	0.66286	-0.026495	0.4458		0.5542
213398_s_at	SDR39U1	short chain dehydrogenase/reductase family 39U, member 1	0.056405	0.76985	0.71344	0.94925		0.05075
213423_x_at	TUSC3	tumor suppressor candidate 3	0.43211	0.75779	0.32568	0.8077		0.1923
213435_at	SATB2	SATB homeobox 2	0.75862	-0.13717	-0.89579	0.01195	0.3	0.98805
213447_at	IPW	imprinted in Prader-Willi syndrome (non-protein coding)	0.044873	0.78463	0.73976	0.9847		0.0153	0.3
213452_at	ZNF184	zinc finger protein 184	0.3222	0.80333	0.48112	0.9782		0.0218	0.3
213457_at	MFHAS1	malignant fibrous histiocytoma amplified sequence 1	0.76701	0.13871	-0.6283	0.02945		0.97055
213460_x_at	NSUN5C	NOL1/NOP2/Sun domain family, member 5C	0.5	0.75045	0.25045	0.8465		0.1535
213489_at	MAPRE2	microtubule-associated protein, RP/EB family, member 2	0.35881	0.815	0.45619	0.88245		0.11755
213502_x_at	LOC91316	glucuronidase, beta/ immunoglobulin lambda-like polypeptide 1 pseudogene	0.52191	0.88589	0.36398	0.92935		0.07065
213524_s_at	G0S2	G0/G1switch 2	0.49384	0.7894	0.29556	0.8715		0.1285
213526_s_at	LIN37	lin-37 homolog (C. elegans)	0.57021	0.84504	0.27483	0.81355		0.18645
213528_at	C1ORF156	chromosome 1 open reading frame 156	0.83968	0.64276	-0.19691	0.1685		0.8315
213533_at	D4S234E	DNA segment on chromosome 4 (unique) 234 expressed sequence	0.56668	0.74737	0.18069	0.71665		0.28335
213553_x_at	APOC1	apolipoprotein C-I	0.15157	0.71745	0.56588	0.96935		0.03065
213564_x_at	LDHB	lactate dehydrogenase B	0.36359	0.70211	0.33851	0.9151		0.0849
213575_at	TRA2A	transformer-2 alpha	0.73093	0.40245	-0.32848	0.2202		0.7798
213579_s_at	EP300	E1A binding protein p300	0.88928	0.71437	-0.17491	0.1214		0.8786
213581_at	PDCD2	programmed cell death 2	0.4063	0.70678	0.30047	0.7976		0.2024
213592_at	APLNR	apelin receptor	0.81308	0.34073	-0.47235	0.13815		0.86185
213594_x_at	FUSIP1	FUS interacting protein (serine/arginine-rich) 1	0.80568	0.84171	0.036028	0.6911		0.3089
213598_at	DIMT1L	DIM1 dimethyladenosine transferase 1-like (S. cerevisiae)	0.7542	0.26965	-0.48456	0.027		0.973
213605_s_at	LOC100134401	hypothetical protein LOC100134401	0.75961	0.47766	-0.28195	0.1694		0.8306
213609_s_at	SEZ6L	seizure related 6 homolog (mouse)-like	0.34892	0.74099	0.39207	0.9074		0.0926
213624_at	SMPDL3A	sphingomyelin phosphodiesterase, acid-like 3A	0.37795	0.84504	0.46709	0.9335		0.0665
213628_at	CLCC1	chloride channel CLIC-like 1	0.81041	-0.00056727	-0.81098	0.01955		0.98045
213629_x_at	MT1F	metallothionein 1F	0.62268	0.70691	0.084227	0.698		0.302
213661_at	DKFZP586H2123	regeneration associated muscle protease	0.4946	0.8645	0.3699	0.87325		0.12675
213664_at	SLC1A1	solute carrier family 1 (neuronal/epithelial high affinity glutamate transporter, system Xag), member 1	0.41708	0.81218	0.3951	0.91455		0.08545
213702_x_at	ASAH1	N-acylsphingosine amidohydrolase (acid ceramidase) 1	0.3809	0.74038	0.35948	0.92415		0.07585
213741_s_at	KPNA1	karyopherin alpha 1 (importin alpha 5)	0.54007	0.85475	0.31468	0.93645		0.06355
213742_at	SFRS11	splicing factor, arginine/serine-rich 11	0.63974	0.71358	0.07384	0.6068		0.3932
213745_at	ATRNL1	attractin-like 1	0.59183	0.81156	0.21974	0.8223		0.1777
213750_at	RSL1D1	ribosomal L1 domain containing 1	0.23611	0.93761	0.70149	0.98565		0.01435	0.3
213753_x_at	EIF5A	eukaryotic translation initiation factor 5A	0.81996	0.73521	-0.084746	0.29245		0.70755
213763_at	HIPK2	homeodomain interacting protein kinase 2	0.69698	0.3969	-0.30008	0.2352		0.7648
213779_at	EMID1	EMI domain containing 1	0.75685	0.6625	-0.094346	0.2447		0.7553
213791_at	PENK	proenkephalin	-0.11902	0.73695	0.85596	0.96725		0.03275
213793_s_at	HOMER1	homer homolog 1 (Drosophila)	0.74391	0.4861	-0.25782	0.19285		0.80715
213798_s_at	CAP1	CAP, adenylate cyclase-associated protein 1 (yeast)	-0.22917	0.71265	0.94182	0.9999		0.0001	0.05
213805_at	ABHD5	abhydrolase domain containing 5	0.72805	-0.040516	-0.76857	0.0022	0.2	0.9978
213822_s_at	UBE3B	ubiquitin protein ligase E3B	0.90603	0.9288	0.022768	0.57995		0.42005
213827_at	SNX26	sorting nexin 26	0.62015	0.80693	0.18678	0.59915		0.40085
213838_at	NOL7	nucleolar protein 7, 27kDa	0.69401	0.24141	-0.4526	0.0521		0.9479
213846_at	COX7C(includesEG:1350)	cytochrome c oxidase subunit VIIc	0.38056	0.78127	0.40071	0.96835		0.03165
213878_at	PYROXD1	pyridine nucleotide-disulphide oxidoreductase domain 1	0.62505	0.75485	0.1298	0.7273		0.2727
213891_s_at	TCF4	transcription factor 4	0.72383	0.41526	-0.30857	0.0421		0.9579
213911_s_at	H2AFZ	H2A histone family, member Z	0.57912	0.84493	0.26581	0.8315		0.1685
213921_at	SST	somatostatin	0.44993	0.71225	0.26231	0.79455		0.20545
213965_s_at	CHD5	chromodomain helicase DNA binding protein 5	0.54105	0.73749	0.19644	0.82295		0.17705
213979_s_at	CTBP1	C-terminal binding protein 1	0.745	0.94245	0.19745	0.9868		0.0132	0.3
213988_s_at	SAT1	spermidine/spermine N1-acetyltransferase 1	0.69578	0.94683	0.25105	0.9964		0.0036	0.25
213989_x_at	SETD4	SET domain containing 4	0.40887	0.80241	0.39354	0.92375		0.07635
214012_at	ERAP1	endoplasmic reticulum aminopeptidase 1	0.78728	0.87279	0.085512	0.59475		0.40525
214022_s_at	IFITM1	interferon induced transmembrane protein 1 (9-27)	0.78719	0.75839	-0.028797	0.3577		0.6423
214044_at	RYR2	ryanodine receptor 2 (cardiac)	0.34373	0.72317	0.37944	0.9435		0.0565
214046_at	FUT9	fucosyltransferase 9 (alpha (1,3) fucosyltransferase)	0.71431	0.29287	-0.42144	0.15795		0.84205
214060_at	SSBP1	single-stranded DNA binding protein 1	0.76752	0.1054	-0.66212	0.20715		0.79285
214070_s_at	ATP10B	ATPase, class V, type 10B	0.70298	0.617	-0.085981	0.37055		0.62945
214085_x_at	GLIPR1	GLI pathogenesis-related 1	0.75266	0.80364	0.050976	0.67925		0.32075
214113_s_at	RBM8A	RNA binding motif protein 8A	0.80324	0.25276	-0.55048	0.0213		0.9787
214114_x_at	FASTK	Fas-activated serine/threonine kinase	0.37093	0.74237	0.37144	0.9701		0.0299
214120_at	RFPL1S	RFPL1 antisense RNA (non-protein coding)	0.52875	0.75337	0.22462	0.8894		0.1106
214203_s_at	PRODH	proline dehydrogenase (oxidase) 1	0.84117	0.83353	-0.0076381	0.4096		0.5904
214204_at	PACRG	PARK2 co-regulated	0.16221	0.68162	0.5194	0.93715		0.06285
214211_at	FTH1	ferritin, heavy polypeptide 1	0.7761	0.75559	-0.020511	0.38285		0.61715
214230_at	CDC42	cell division cycle 42 (GTP binding protein, 25kDa)	0.36516	0.92829	0.56313	0.99555		0.00445	0.25
214239_x_at	PCGF2	polycomb group ring finger 2	0.72313	0.63025	-0.092886	0.28675		0.71325
214260_at	COPS8	COP9 constitutive photomorphogenic homolog subunit 8 (Arabidopsis)	0.69325	0.6094	-0.083843	0.40805		0.59195
214265_at	ITGA8(includesEG:8516)	integrin, alpha 8	0.73931	0.52348	-0.21582	0.25835		0.74375
214271_x_at	RPL12(includesEG:6136)	ribosomal protein L12	0.59924	0.69172	0.092486	0.88155		0.11845
214281_s_at	RCHY1	ring finger and CHY zinc finger domain containing 1	0.80965	0.66406	-0.14558	0.21425		0.78575
214290_s_at	HIST2H2AA3	histone cluster 2, H2aa3	0.33388	0.8061	0.47222	0.78725		0.21275
214328_s_at	HSP90AA1	heat shock protein 90kDa alpha (cytosolic), class A member 1	-0.68714	0.50228	1.1894	0.9999		0.0001	0.05
214369_s_at	RASGRP2	RAS guanyl releasing protein 2 (calcium and DAG-regulated)	0.13157	0.84551	0.71395	0.87095		0.12905
214414_x_at	HBA1	hemoglobin, alpha 1	0.48462	0.75428	0.26966	0.8631		0.1369
214428_x_at	C4A	complement component 4A (Rodgers blood group)	0.65943	0.78355	0.12411	0.67355		0.32645
214436_at	FBXL2	F-box and leucine-rich repeat protein 2	0.26866	0.74215	0.47349	0.9107		0.0893
214500_at	H2AFY	H2A histone family, member Y	0.70388	0.57444	-0.12944	0.36515		0.63485
214508_x_at	CREM	cAMP responsive element modulator	-0.03298	0.87781	0.91079	0.9981		0.0019	0.2
214526_x_at	PMS2L1	postmeiotic segregation increased 2-like 1 pseudogene	0.23997	0.83688	0.59691	0.9556		0.0444
214527_s_at	PQBP1	polyglutamine binding protein 1	0.70593	0.40864	-0.2973	0.1554		0.8446
214545_s_at	PROSC	proline synthetase co-transcribed homolog (bacterial)	0.84772	0.48545	-0.36227	0.02115		0.97885
214553_s_at	ARPP-19	cyclic AMP phosphoprotein, 19 kD	0.71937	0.66128	-0.058085	0.3716		0.6284
214589_at	FGF12	fibroblast growth factor 12	0.71038	0.63433	-0.07605	0.36205		0.63795
214620_x_at	PAM	peptidylglycine alpha-amidating monooxygenase	0.2503	0.8411	0.59081	0.9672		0.0328
214629_x_at	RTN4	reticulon 4	0.59539	0.84183	0.24644	0.8432		0.1568
214652_at	DRD1	dopamine receptor D1	0.76924	0.71359	-0.055647	0.3849		0.6151
214668_at	C13ORF1	chromosome 13 open reading frame 1	0.69409	0.24941	-0.44468	0.059		0.941
214682_at	LOC399491	LOC399491 protein	0.53457	0.74373	0.20916	0.68355		0.31645
214684_at	MEF2A(includesEG:4205)	myocyte enhancer factor 2A	0.73434	0.71073	-0.023609	0.4182		0.5818
214695_at	UBAP2L	ubiquitin associated protein 2-like	-0.51022	0.70787	1.2181	0.99355		0.00645	0.25
214696_at	C17ORF91	chromosome 17 open reading frame 91	0.84578	0.50036	-0.34542	0.29335		0.70665
214711_at	GATC	glutamyl-tRNA(Gln) amidotransferase, subunit C homolog (bacterial)	0.90397	0.7092	-0.19477	0.1355		0.8645
214741_at	ZNF131	zinc finger protein 131	0.86166	0.68865	-0.173	0.0781		0.9219
214749_s_at	ARMCX6	armadillo repeat containing, X-linked 6	0.63923	0.74176	0.10253	0.5775		0.4225
214760_at	ZNF337	zinc finger protein 337	0.70417	-0.348	-1.0522	0.002	0.2	0.998
214762_at	ATP6V1G2	ATPase, H+ transporting, lysosomal 13kDa, V1 subunit G2	0.012504	0.73562	0.72312	0.9801		0.0199	0.3
214773_x_at	TIPRL	TIP41, TOR signaling pathway regulator-like (S. cerevisiae)	0.50566	0.7569	0.25124	0.7516		0.2484
214783_s_at	ANXA11	annexin A11	-0.013215	0.69426	0.70748	0.9864		0.0136	0.3
214806_at	BICD1	bicaudal D homolog 1 (Drosophila)	0.62906	0.6985	0.069436	0.6232		0.3768
214815_at	TRIM33	tripartite motif-containing 33	0.80348	0.11591	-0.68757	0.16505		0.83495
214820_at	BRWD1	bromodomain and WD repeat domain containing 1	0.70158	-0.14204	-0.84361	0.005	0.25	0.995
214823_at	ZNF204	zinc finger protein 204 pseudogene	0.34432	0.72939	0.38507	0.86705		0.13295
214829_at	AASS	aminoadipate-semialdehyde synthase	0.1909	0.7529	0.562	0.83295		0.16705
214839_at	LOC157627	hypothetical LOC157627	0.34855	0.70241	0.35386	0.8996		0.1004
214844_s_at	DOK5	docking protein 5	0.50325	0.78924	0.28598	0.8729		0.1271
214850_at	SMA4	glucuronidase, beta pseudogene	0.92298	0.88401	-0.038964	0.231		0.769
214870_x_at	NPIP	nuclear pore complex interacting protein	0.48716	0.73467	0.24751	0.69195		0.30805
214874_at	PKP4	plakophilin 4	0.23852	0.75259	0.51407	0.997		0.003	0.25
214882_s_at	SFRS2	splicing factor, arginine/serine-rich 2	0.47605	0.78535	0.3093	0.7651		0.2349
214889_at	FAM149A	family with sequence similarity 149, member A	0.78657	0.93353	0.14696	0.9291		0.0709
214890_s_at	FAM149A	family with sequence similarity 149, member A	0.72362	0.82237	0.098746	0.7385		0.2615
215005_at	NECAB2	N-terminal EF-hand calcium binding protein 2	0.69991	0.056762	-0.64315	0.04585		0.95415
215009_s_at	SEC31A	SEC31 homolog A (S. cerevisiae)	0.61035	0.81461	0.20426	0.8716		0.1284
215012_at	ZNF451	zinc finger protein 451	0.72371	0.37443	-0.34927	0.24015		0.75985
215024_at	C7ORF28B	chromosome 7 open reading frame 28B	0.5458	0.68794	0.14214	0.79645		0.20355
215034_s_at	TM4SF1	transmembrane 4 L six family member 1	0.96124	0.59184	-0.3694	0.34165		0.65835
215043_s_at	SMA5	glucuronidase, beta pseudogene	0.82762	0.88099	0.053371	0.6635		0.3365
215070_x_at	RABGAP1	RAB GTPase activating protein 1	0.80356	0.80874	0.005174	0.4917		0.5083
215091_s_at	GTF3A	general transcription factor IIIA	0.54455	0.89231	0.34776	0.99075		0.00925	0.3
215113_s_at	SENP3	SUMO1/sentrin/SMT3 specific peptidase 3	0.50129	0.69379	0.1925	0.8268		0.1732
215123_at	LOC729602	NPIP-like protein ENSP00000283050	0.534	0.80481	0.27082	0.73995		0.26005
215145_s_at	CNTNAP2	contactin associated protein-like 2	0.60259	0.81146	0.20887	0.9097		0.0903
215165_x_at	UMPS	uridine monophosphate synthetase	-0.022465	0.73064	0.7531	0.9759		0.0241	0.3
215171_s_at	TIMM17A(includesEG:10440)	translocase of inner mitochondrial membrane 17 homolog A (yeast)	0.35601	0.74559	0.38959	0.7933		0.2067
215172_at	PTPN20B	protein tyrosine phosphatase, non-receptor type 20B	0.34721	0.83627	0.48906	0.9875		0.0125	0.3
215175_at	PCNX	pecanex homolog (Drosophila)	0.88777	0.8969	0.0091291	0.5787		0.4213
215193_x_at	HLA-DRB1	major histocompatibility complex, class II, DR beta 1	0.66091	0.75438	0.09347	0.651		0.349
215223_s_at	SOD2	superoxide dismutase 2, mitochondrial	0.98659	0.27318	-0.71341	0.02705		0.97295
215227_x_at	ACP1	acid phosphatase 1, soluble	0.29239	0.73061	0.43822	0.8705		0.1295
215230_x_at	EIF3C	eukaryotic translation initiation factor 3, subunit C	0.73173	0.68143	-0.050305	0.4126		0.5874
215244_at	DGCR5	DiGeorge syndrome critical region gene 5 (non-protein coding)	0.66502	0.6833	0.018285	0.59585		0.40415
215296_at	CDC42BPA	CDC42 binding protein kinase alpha (DMPK-like)	0.45506	0.82139	0.36633	0.9372		0.0628
215299_x_at	SULT1A1	sulfotransferase family, cytosolic, 1A, phenol-preferring, member 1	0.82131	0.56628	-0.25503	0.0776		0.9224
215303_at	DCLK1	doublecortin-like kinase 1	0.5679	0.76344	0.19554	0.69485		0.30515
215313_x_at	HLA-A	major histocompatibility complex, class I, A	0.38162	0.80539	0.42377	0.94965		0.05035
215329_s_at	CDC2L2	cell division cycle 2-like 2 (PITSLRE proteins)	0.85069	0.095486	-0.7552	0.06675		0.93325
215333_x_at	GSTM1	glutathione S-transferase mu 1	0.82914	0.78422	-0.04492	0.381		0.619
215342_s_at	RABGAP1L	RAB GTPase activating protein 1-like	0.7946	0.74569	-0.04891	0.3586		0.6414
215358_x_at	ZNF37B	zinc finger protein 37B	0.93677	0.7249	-0.21187	0.05995		0.94005
215409_at	LPCAT4	lysophosphatidylcholine acyltransferase 4	0.74246	0.0037699	-0.73869	0.0158		0.9842
215411_s_at	TRAF3IP2	TRAF3 interacting protein 2	0.4316	0.80574	0.37413	0.8271		0.1729
215419_at	ZFR2(includesEG:23217)	zinc finger RNA binding protein 2	0.15155	0.67525	0.5237	0.90865		0.09135
215460_x_at	BRD1	bromodomain containing 1	0.042914	0.68539	0.64248	0.97805		0.02195	0.3
215470_at	GTF2H2B	general transcription factor IIH, polypeptide 2B	0.77784	0.706	-0.071844	0.30775		0.69225
215472_at	PACRG	PARK2 co-regulated	0.67866	0.81917	0.14051	0.6035		0.39655
215483_at	AKAP9	A kinase (PRKA) anchor protein (yotiao) 9	0.63597	0.75282	0.11685	0.69215		0.30785
215493_x_at	BTN2A1	butyrophilin, subfamily 2, member A1	-0.11716	0.70549	0.82265	0.9462		0.0538
215606_s_at	ERC1	ELKS/RAB6-interacting/CAST family member 1	0.81015	0.67589	-0.13426	0.3759		0.6241
215616_s_at	JMJD2B	jumonji domain containing 2B	0.13686	0.74327	0.60641	0.7121		0.2879
215645_at	FLCN	folliculin	0.38545	0.82018	0.43473	0.9267		0.0733
215698_at	JARID1A(includesEG:5927)	jumonji, AT rich interactive domain 1A	0.68289	0.72052	0.037622	0.5607		0.4393
215867_x_at	CA12	carbonic anhydrase XII	0.77062	0.7278	-0.042817	0.46395		0.53605
215903_s_at	MAST2	microtubule associated serine/threonine kinase 2	0.35119	0.73622	0.38503	0.9706		0.0294
215918_s_at	SPTBN1	spectrin, beta, non-erythrocytic 1	0.50715	0.84328	0.33613	0.8563		0.1437
215952_s_at	OAZ1	ornithine decarboxylase antizyme 1	0.56772	0.73496	0.16724	0.7166		0.2834
216037_x_at	TCF7L2(includesEG:6934)	transcription factor 7-like 2 (T-cell specific, HMG-box)	0.34612	0.73804	0.39192	0.8904		0.1096
216086_at	SV2C	synaptic vesicle glycoprotein 2C	0.73047	0.44034	-0.29013	0.1945		0.8055
216120_s_at	ATP2B2	ATPase, Ca++ transporting, plasma membrane 2	0.35303	0.69213	0.3391	0.9419		0.0581
216195_at	ANK2	ankyrin 2, neuronal	0.68458	-0.01044	-0.69502	0.0251		0.9749
216218_s_at	PLCL2	phospholipase C-like 2	0.74926	0.27015	-0.47912	0.0512		0.9488
216242_x_at	MGC13098	polymerase (RNA) II (DNA directed) polypeptide J4, pseudogene	0.64547	0.80201	0.15654	0.7539		0.2461
216304_x_at	YME1L1	YME1-like 1 (S. cerevisiae)	0.41198	0.77629	0.36432	0.894		0.106
216305_s_at	C2ORF3	chromosome 2 open reading frame 3	0.71553	0.60009	-0.11544	0.3667		0.6333
216336_x_at	MT1M	metallothionein 1M	0.89198	0.64489	-0.24709	0.06305		0.93695
216356_x_at	BAIAP3(includesEG:8938)	BAI1-associated protein 3	0.87064	0.61725	-0.25339	0.034		0.966
216526_x_at	HLA-B	major histocompatibility complex, class I, B	0.78794	0.65987	-0.12806	0.35195		0.64805
216593_s_at	PIGC	phosphatidylinositol glycan anchor biosynthesis, class C	0.67646	0.69571	0.019252	0.5325		0.4675
216594_x_at	AKR1C1	aldo-keto reductase family 1, member C1 (dihydrodiol dehydrogenase 1; 20-alpha (3-alpha)-hydroxysteroid dehydrogenase)	0.8242	0.34852	-0.47568	0.0846		0.9154
216640_s_at	PDIA6	protein disulfide isomerase family A, member 6	0.89785	0.65595	-0.2419	0.04235		0.95765
216834_at	RGS1	regulator of G-protein signaling 1	0.99941	0.99054	-0.0088715	0.4092		0.5908
216836_s_at	ERBB2	v-erb-b2 erythroblastic leukemia viral oncogene homolog 2, neuro/glioblastoma derived oncogene homolog (avian)	0.73617	0.40868	-0.32749	0.2447		0.7553
216870_x_at	DLEU2	deleted in lymphocytic leukemia 2 (non-protein coding)	0.6864	0.62502	-0.061379	0.38435		0.61565
216885_s_at	WDR42A	WD repeat domain 42A	0.74614	-0.34014	-1.0863	5e-05	0.05	0.99995
216902_s_at	RRN3	RRN3 RNA polymerase I transcription factor homolog (S. cerevisiae)	0.80317	0.66538	-0.13778	0.15965		0.84035
216996_s_at	FASTKD2	FAST kinase domains 2	0.38708	0.80152	0.41444	0.96445		0.03555
217025_s_at	DBN1	drebrin 1	0.75206	-0.16372	-0.91578	5e-05	0.05	1
217028_at	CXCR4	chemokine (C-X-C motif) receptor 4	0.57684	0.90153	0.32469	0.69565		0.30435
217122_s_at	SLC35E2	solute carrier family 35, member E2	0.17669	0.81274	0.63605	0.9831		0.0169	0.3
217140_s_at	VDAC1	voltage-dependent anion channel 1	0.65176	0.70247	0.050711	0.56725		0.43275
217168_s_at	HERPUD1	homocysteine-inducible, endoplasmic reticulum stress-inducible, ubiquitin-like domain member 1	0.45407	0.78593	0.33186	0.9569		0.0431
217208_s_at	DLG1	discs, large homolog 1 (Drosophila)	0.81214	0.17862	-0.63352	0.0177		0.9823
217232_x_at	HBB(includesEG:3043)	hemoglobin, beta	0.45981	0.85972	0.39991	0.94255		0.05745
217250_s_at	CHD5	chromodomain helicase DNA binding protein 5	0.75624	0.84508	0.088839	0.65215		0.34785
217356_s_at	PGK1	phosphoglycerate kinase 1	0.73148	0.73512	0.0036348	0.49855		0.50145
217414_x_at	HBA1	hemoglobin, alpha 1	0.53327	0.78228	0.24901	0.82695		0.17305
217437_s_at	TACC1	transforming, acidic coiled-coil containing protein 1	0.17696	0.73109	0.55413	0.9298		0.0702
217456_x_at	HLA-E	major histocompatibility complex, class I, E	0.78682	0.15174	-0.63508	0.0016	0.2	0.9984
217466_x_at	RPS2	ribosomal protein S2	0.71002	-0.21169	-0.92171	0.01295		0.98705
217506_at	LOC400642	hypothetical LOC400642	0.66859	0.74955	0.080953	0.7205		0.2795
217546_at	MT1M	metallothionein 1M	0.91572	0.34585	-0.56987	0.08665		0.91335
217556_at	CLCN4	chloride channel 4	0.73741	0.70704	-0.030372	0.4943		0.5057
217593_at	ZSCAN18	zinc finger and SCAN domain containing 18	0.35475	0.77362	0.41887	0.98145		0.01855	0.3
217610_at	MGC13098	polymerase (RNA) II (DNA directed) polypeptide J4, pseudogene	0.81389	0.88999	0.076098	0.66655		0.33345
217719_at	EIF3EIP	eukaryotic translation initiation factor 3, subunit E interacting protein	0.75349	0.79469	0.041196	0.56335		0.43665
217728_at	S100A6	S100 calcium binding protein A6	0.2864	0.80068	0.51428	0.9888		0.0112	0.3
217735_s_at	EIF2AK1	eukaryotic translation initiation factor 2-alpha kinase 1	0.77486	0.69385	-0.081017	0.17085		0.82915
217738_at	NAMPT	nicotinamide phosphoribosyltransferase	0.80232	0.50184	-0.30048	0.08965		0.91035
217739_s_at	NAMPT	nicotinamide phosphoribosyltransferase	0.87184	0.48311	-0.38873	0.2578		0.7422
217747_s_at	RPS9	ribosomal protein S9	0.30682	0.68593	0.3791	0.9427		0.0573
217753_s_at	RPS26	ribosomal protein S26	0.84782	0.9115	0.063685	0.74345		0.25655
217761_at	ADI1	acireductone dioxygenase 1	0.69308	0.39593	-0.29716	0.0269		0.9731
217767_at	C3	complement component 3	0.82393	0.77562	-0.048319	0.4725		0.5275
217768_at	C14ORF166	chromosome 14 open reading frame 166	0.20938	0.78965	0.58027	0.91075		0.08925
217773_s_at	NDUFA4	NADH dehydrogenase (ubiquinone) 1 alpha subcomplex, 4, 9kDa	0.59415	0.77713	0.18297	0.71735		0.28265
217779_s_at	PNRC2(includesEG:55629)	proline-rich nuclear receptor coactivator 2	0.60573	0.69647	0.090732	0.64055		0.35945
217794_at	PRR13	proline rich 13	0.7273	0.51947	-0.20783	0.1874		0.8126
217800_s_at	NDFIP1	Nedd4 family interacting protein 1	0.12669	0.81132	0.68464	0.9929		0.0071	0.25
217809_at	BZW2	basic leucine zipper and W2 domains 2	0.72483	0.45066	-0.27416	0.17625		0.82375
217812_at	YTHDF2	YTH domain family, member 2	0.36634	0.69833	0.33199	0.8779		0.1221
217825_s_at	UBE2J1	ubiquitin-conjugating enzyme E2, J1 (UBC6 homolog, yeast)	0.41134	0.73651	0.32517	0.83935		0.16065
217837_s_at	VPS24	vacuolar protein sorting 24 homolog (S. cerevisiae)	0.48529	0.89772	0.41244	0.9154		0.0846
217848_s_at	PPA1	pyrophosphatase (inorganic) 1	0.47931	0.8165	0.33718	0.879		0.121
217853_at	TNS3	tensin 3	0.79927	0.6307	-0.16856	0.227		0.773
217854_s_at	POLR2E	polymerase (RNA) II (DNA directed) polypeptide E, 25kDa	0.36777	0.84445	0.47668	0.98445		0.01555	0.3
217870_s_at	CMPK1	cytidine monophosphate (UMP-CMP) kinase 1, cytosolic	0.66017	0.70593	0.045764	0.6286		0.3714
217885_at	IPO9	importin 9	0.36514	0.68586	0.32073	0.8934		0.1066
217900_at	IARS2	isoleucyl-tRNA synthetase 2, mitochondrial	0.76252	0.63817	-0.12436	0.321		0.679
217907_at	MRPL18	mitochondrial ribosomal protein L18	0.18705	0.82325	0.6362	0.99445		0.00555	0.25
217911_s_at	BAG3	BCL2-associated athanogene 3	0.95397	0.73415	-0.21982	0.1188		0.8812
217933_s_at	LAP3	leucine aminopeptidase 3	0.62699	0.69512	0.068125	0.5229		0.4771
217945_at	BTBD1	BTB (POZ) domain containing 1	0.33392	0.78127	0.44735	0.8787		0.1213
217947_at	CMTM6	CKLF-like MARVEL transmembrane domain containing 6	0.80097	0.38526	-0.41571	0.0791		0.9209
217958_at	TRAPPC4	trafficking protein particle complex 4	0.50397	0.81611	0.31215	0.9581		0.0419
217959_s_at	TRAPPC4	trafficking protein particle complex 4	0.75007	0.73145	-0.018616	0.38525		0.61475
217962_at	NOP10	NOP10 ribonucleoprotein homolog (yeast)	0.14658	0.68853	0.54195	0.9388		0.0612
217970_s_at	CNOT6	CCR4-NOT transcription complex, subunit 6	0.72635	0.63134	-0.095009	0.2992		0.7008
217976_s_at	DYNC1LI1	dynein, cytoplasmic 1, light intermediate chain 1	0.2634	0.72151	0.45811	0.85205		0.14795
217979_at	TSPAN13	tetraspanin 13	0.41483	0.78914	0.37431	0.9444		0.0556
218002_s_at	CXCL14	chemokine (C-X-C motif) ligand 14	0.68521	0.13541	-0.5498	0.0131		0.9869
218031_s_at	FOXN3	forkhead box N3	0.0094974	0.82051	0.81101	0.95625		0.04375
218053_at	PRPF40A	PRP40 pre-mRNA processing factor 40 homolog A (S. cerevisiae)	0.71113	0.46856	-0.24257	0.09305		0.90695
218055_s_at	WDR41	WD repeat domain 41	0.80407	0.81384	0.0097685	0.52555		0.47445
218062_x_at	CDC42EP4	CDC42 effector protein (Rho GTPase binding) 4	0.70204	0.1987	-0.50334	0.0275		0.9725
218097_s_at	CUEDC2	CUE domain containing 2	0.65834	0.72648	0.068138	0.5932		0.4068
218103_at	FTSJ3	FtsJ homolog 3 (E. coli)	0.71414	0.54488	-0.16926	0.31685		0.68315
218106_s_at	MRPS10	mitochondrial ribosomal protein S10	0.56208	0.86551	0.30343	0.95595		0.04405
218111_s_at	CMAS	cytidine monophosphate N-acetylneuraminic acid synthetase	0.24134	0.75769	0.51636	0.9249		0.0751
218123_at	C21ORF59	chromosome 21 open reading frame 59	0.71061	0.35205	-0.35856	0.0476		0.9524
218162_at	OLFML3	olfactomedin-like 3	0.64654	0.75665	0.11011	0.63915		0.36085
218163_at	MCTS1	malignant T cell amplified sequence 1	0.43752	0.78493	0.34742	0.8156		0.1844
218164_at	SPATA20	spermatogenesis associated 20	0.81549	0.75823	-0.057251	0.3624		0.6376
218176_at	MAGEF1	melanoma antigen family F, 1	0.25924	0.76255	0.50331	0.91385		0.08615
218188_s_at	TIMM13	translocase of inner mitochondrial membrane 13 homolog (yeast)	0.71043	0.54456	-0.16587	0.2013		0.7987
218196_at	OSTM1	osteopetrosis associated transmembrane protein 1	0.42594	0.81136	0.38542	0.93205		0.06795
218201_at	NDUFB2	NADH dehydrogenase (ubiquinone) 1 beta subcomplex, 2, 8kDa	0.21894	0.87739	0.65846	0.96825		0.03175
218224_at	PNMA1	paraneoplastic antigen MA1	0.59732	0.87698	0.27966	0.7505		0.2495
218232_at	C1QA	complement component 1, q subcomponent, A chain	0.65094	0.90138	0.25043	0.85085		0.14915
218237_s_at	SLC38A1	solute carrier family 38, member 1	0.75417	0.77185	0.017689	0.5795		0.4205
218252_at	CKAP2	cytoskeleton associated protein 2	0.43506	0.73692	0.30186	0.8846		0.1154
218258_at	POLR1D	polymerase (RNA) I polypeptide D, 16kDa	0.42432	0.90307	0.47874	0.9752		0.0248
218289_s_at	UBA5	ubiquitin-like modifier activating enzyme 5	0.6077	0.75248	0.14477	0.63275		0.36725
218291_at	ROBLD3	roadblock domain containing 3	0.47323	0.70346	0.23023	0.79845		0.20155
218304_s_at	OSBPL11	oxysterol binding protein-like 11	0.73516	0.27441	-0.46074	0.099		0.901
218310_at	RABGEF1	RAB guanine nucleotide exchange factor (GEF) 1	0.44476	0.74795	0.30318	0.88205		0.11795
218322_s_at	ACSL5	acyl-CoA synthetase long-chain family member 5	0.49104	0.87618	0.38515	0.6749		0.3251
218327_s_at	SNAP29	synaptosomal-associated protein, 29kDa	0.56664	0.72128	0.15465	0.82975		0.17025
218334_at	THOC7	THO complex 7 homolog (Drosophila)	0.26863	0.69086	0.42223	0.90885		0.09115
218340_s_at	UBA6	ubiquitin-like modifier activating enzyme 6	0.7035	0.39096	-0.31253	0.28925		0.71075
218347_at	TYW1	tRNA-yW synthesizing protein 1 homolog (S. cerevisiae)	0.26511	-0.69018	-0.9553	0.00155	0.2	0.99845
218398_at	MRPS30	mitochondrial ribosomal protein S30	0.32867	0.833	0.50433	0.9901		0.0099	0.3
218414_s_at	NDE1	nudE nuclear distribution gene E homolog 1 (A. nidulans)	0.73279	0.22913	-0.50365	0.0249		0.9751
218432_at	FBXO3	F-box protein 3	0.19815	0.70267	0.50452	0.9598		0.0402
218434_s_at	AACS	acetoacetyl-CoA synthetase	-0.1237	0.75213	0.87583	1		5e-05	0.05
218449_at	UFSP2	UFM1-specific peptidase 2	0.72581	0.56425	-0.16156	0.27605		0.72395
218455_at	NFS1	NFS1 nitrogen fixation 1 homolog (S. cerevisiae)	0.3324	0.83219	0.49979	0.9856		0.0144	0.3
218472_s_at	PELO	pelota homolog (Drosophila)	0.43313	0.71901	0.28588	0.9047		0.0953
218476_at	POMT1	protein-O-mannosyltransferase 1	0.53301	0.72579	0.19278	0.8343		0.1657
218483_s_at	C11ORF60	chromosome 11 open reading frame 60	0.67802	0.82337	0.14535	0.83215		0.16785
218507_at	HIG2	hypoxia-inducible protein 2	0.97345	0.047634	-0.92582	0.0311		0.9689
218516_s_at	IMPAD1	inositol monophosphatase domain containing 1	0.7282	0.73935	0.011153	0.49795		0.50205
218523_at	LHPP	phospholysine phosphohistidine inorganic pyrophosphate phosphatase	0.70157	-0.032293	-0.73387	0.03525		0.96475
218526_s_at	RANGRF	RAN guanine nucleotide release factor	0.45015	0.80823	0.35809	0.9038		0.0962
218534_s_at	AGGF1	angiogenic factor with G patch and FHA domains 1	0.72804	0.74347	0.015427	0.48495		0.51505
218573_at	MAGEH1	melanoma antigen family H, 1	0.46708	0.8968	0.42972	0.90745		0.09255
218587_s_at	KTELC1	KTEL (Lys-Tyr-Glu-Leu) containing 1	-0.25577	0.71801	0.97378	0.99295		0.00705	0.25
218588_s_at	FAM114A2	family with sequence similarity 114, member A2	0.34941	0.74723	0.39783	0.91505		0.08495
218597_s_at	CISD1	CDGSH iron sulfur domain 1	0.29995	0.80716	0.50721	0.82065		0.17935
218603_at	HECA	headcase homolog (Drosophila)	0.37629	0.844	0.4677	0.95185		0.04815
218611_at	IER5	immediate early response 5	0.22838	0.96431	0.73593	0.9924		0.0076	0.25
218628_at	CCDC53	coiled-coil domain containing 53	0.41623	0.76277	0.34654	0.9106		0.0894
218631_at	AVPI1	arginine vasopressin-induced 1	0.38833	0.71861	0.33028	0.78365		0.21635
218643_s_at	CRIPT	cysteine-rich PDZ-binding protein	0.86543	0.37466	-0.49077	0.02875		0.97125
218646_at	C4ORF27	chromosome 4 open reading frame 27	0.69404	0.73719	0.043154	0.5808		0.4192
218648_at	CRTC3	CREB regulated transcription coactivator 3	0.7152	-0.070116	-0.78532	0.0171		0.9829
218671_s_at	ATPIF1	ATPase inhibitory factor 1	0.35913	0.81246	0.45333	0.9437		0.0563
218682_s_at	SLC4A1AP	solute carrier family 4 (anion exchanger), member 1, adaptor protein	0.49672	0.80343	0.3067	0.73575		0.26425
218723_s_at	C13ORF15	chromosome 13 open reading frame 15	0.9364	0.81661	-0.11978	0.17315		0.82685
218727_at	SLC38A7	solute carrier family 38, member 7	0.19503	0.7	0.50498	0.9416		0.0584
218735_s_at	ZNF544	zinc finger protein 544	0.71554	0.51759	-0.19795	0.1803		0.8197
218761_at	RNF111	ring finger protein 111	0.71212	0.2522	-0.45992	0.13795		0.86205
218786_at	NT5DC3	5'-nucleotidase domain containing 3	0.10437	0.69458	0.59021	0.9502		0.0498
218793_s_at	SCML1	sex comb on midleg-like 1 (Drosophila)	0.8895	0.3494	-0.5401	0.0894		0.9106
218816_at	LRRC1	leucine rich repeat containing 1	0.72777	0.014934	-0.71283	0.00355	0.2	0.99645
218824_at	PNMAL1	PNMA-like 1	0.26035	0.84873	0.58838	0.78485		0.21515
218830_at	RPL26L1	ribosomal protein L26-like 1	0.12465	0.71147	0.58683	0.96345		0.03655
218852_at	PPP2R3C	protein phosphatase 2 (formerly 2A), regulatory subunit B'', gamma	0.61593	0.84637	0.23044	0.80475		0.19525
218853_s_at	MOSPD1(includesEG:56180)	motile sperm domain containing 1	0.60282	0.79134	0.18852	0.74835		0.25165
218858_at	DEPDC6(includesEG:64798)	DEP domain containing 6	0.7033	0.67892	-0.024385	0.42345		0.57655
218868_at	ACTR3B	ARP3 actin-related protein 3 homolog B (yeast)	0.54442	0.76498	0.22056	0.76795		0.23205
218888_s_at	NETO2	neuropilin (NRP) and tolloid (TLL)-like 2	0.41173	0.75361	0.34188	0.94595		0.05405
218897_at	TMEM177	transmembrane protein 177	0.39731	0.74798	0.35068	0.8523		0.1477
218898_at	FAM57A	family with sequence similarity 57, member A	0.74821	0.44372	-0.30449	0.1803		0.8197
218899_s_at	BAALC	brain and acute leukemia, cytoplasmic	0.38199	0.72473	0.34274	0.90135		0.09865
218901_at	PLSCR4	phospholipid scramblase 4	0.71493	0.40038	-0.31455	0.19235		0.80765
218906_x_at	KLC2	kinesin light chain 2	0.81584	0.4215	-0.39434	0.08305		0.91695
218911_at	YEATS4	YEATS domain containing 4	0.57762	0.83273	0.25511	0.84735		0.15265
218915_at	NF2	neurofibromin 2 (merlin)	0.063674	0.77417	0.7105	0.961		0.039
218917_s_at	ARID1A	AT rich interactive domain 1A (SWI-like)	0.75935	0.64575	-0.1136	0.35905		0.64095
218919_at	ZFAND1	zinc finger, AN1-type domain 1	0.77768	0.64033	-0.13734	0.2848		0.7152
218932_at	ZNHIT6	zinc finger, HIT type 6	0.79902	0.098692	-0.70032	0.01255	0.3	0.98745
218951_s_at	PLCXD1	phosphatidylinositol-specific phospholipase C, X domain containing 1	0.72187	0.79341	0.071534	0.667		0.333
218957_s_at	PAAF1	proteasomal ATPase-associated factor 1	0.85638	0.62975	-0.22663	0.13745		0.86255
218973_at	EFTUD1	elongation factor Tu GTP binding domain containing 1	0.83375	0.29719	-0.53656	0.1767		0.8233
218995_s_at	EDN1	endothelin 1	0.9532	0.65354	-0.29966	0.09565		0.90435
219001_s_at	WDR32	WD repeat domain 32	0.87299	0.54896	-0.32403	0.04235		0.95765
219027_s_at	MYO9A	myosin IXA	0.76219	0.87191	0.10972	0.8445		0.1555
219028_at	HIPK2	homeodomain interacting protein kinase 2	0.53086	0.91222	0.38136	0.79965		0.20035
219033_at	PARP8	poly (ADP-ribose) polymerase family, member 8	-0.17052	0.69954	0.87007	0.9891		0.0109	0.3
219036_at	CEP70	centrosomal protein 70kDa	0.88157	0.42497	-0.45661	0.04305		0.95695
219037_at	RRP15	ribosomal RNA processing 15 homolog (S. cerevisiae)	0.14331	0.78622	0.64291	0.98595		0.01405	0.3
219043_s_at	PDCL3	phosducin-like 3	0.80281	0.64468	-0.15813	0.27925		0.72075
219056_at	RNASEH2B	ribonuclease H2, subunit B	0.67369	0.72909	0.055396	0.57495		0.42505
219060_at	WDYHV1	WDYHV motif containing 1	0.72905	0.68812	-0.040924	0.3803		0.6197
219061_s_at	LAGE3	L antigen family, member 3	0.4315	0.79526	0.36376	0.81705		0.18295
219064_at	ITIH5	inter-alpha (globulin) inhibitor H5	0.55933	0.67818	0.11885	0.75085		0.24915
219077_s_at	WWOX	WW domain containing oxidoreductase	0.65785	0.70277	0.044925	0.5872		0.4128
219093_at	PID1(includesEG:55022)	phosphotyrosine interaction domain containing 1	0.66374	0.78366	0.11992	0.6401		0.3599
219094_at	ARMC8	armadillo repeat containing 8	0.79358	0.54559	-0.24798	0.1106		0.8894
219110_at	GAR1	GAR1 ribonucleoprotein homolog (yeast)	0.51364	0.67468	0.16104	0.7346		0.2654
219135_s_at	LMF1	lipase maturation factor 1	0.74203	0.1805	-0.56153	0.01015	0.3	0.98985
219147_s_at	C9ORF95	chromosome 9 open reading frame 95	0.83402	0.715	-0.11902	0.29035		0.70965
219166_at	C14ORF104	chromosome 14 open reading frame 104	0.33292	0.80342	0.4705	0.98825		0.01175	0.3
219169_s_at	TFB1M	transcription factor B1, mitochondrial	0.74814	0.09043	-0.65771	0.0573		0.9427
219175_s_at	SLC41A3(includesEG:54946)	solute carrier family 41, member 3	0.058064	0.84887	0.79081	0.98155		0.01845	0.3
219184_x_at	TIMM22	translocase of inner mitochondrial membrane 22 homolog (yeast)	0.71525	0.66641	-0.04884	0.51715		0.48285
219185_at	SIRT5	sirtuin (silent mating type information regulation 2 homolog) 5 (S. cerevisiae)	0.75604	0.28169	-0.47435	0.0789		0.9211
219204_s_at	SRR	serine racemase	0.85614	0.79617	-0.059973	0.2823		0.7177
219217_at	NARS2	asparaginyl-tRNA synthetase 2, mitochondrial (putative)	0.54863	0.70928	0.16065	0.80685		0.19315
219269_at	HMBOX1	homeobox containing 1	0.35367	0.85683	0.50316	0.98305		0.01695	0.3
219281_at	MSRA	methionine sulfoxide reductase A	0.48539	0.7343	0.24891	0.8806		0.1194
219283_at	C1GALT1C1	C1GALT1-specific chaperone 1	0.59138	0.73673	0.14534	0.77415		0.22585
219300_s_at	CNTNAP2	contactin associated protein-like 2	0.27402	0.75116	0.47714	0.9892		0.0108	0.3
219340_s_at	CLN8	ceroid-lipofuscinosis, neuronal 8 (epilepsy, progressive with mental retardation)	0.31479	0.69025	0.37546	0.8723		0.1277
219349_s_at	EXOC2	exocyst complex component 2	0.71792	0.073798	-0.64413	0.03245		0.96755
219351_at	TRAPPC2	trafficking protein particle complex 2	0.71373	0.57204	-0.14169	0.2089		0.7911
219368_at	NAP1L2	nucleosome assembly protein 1-like 2	-0.13276	0.72738	0.86014	0.9797		0.0203	0.3
219371_s_at	KLF2	Kruppel-like factor 2 (lung)	0.92789	0.80178	-0.12611	0.0989		0.9011
219373_at	DPM3	dolichyl-phosphate mannosyltransferase polypeptide 3	0.7453	0.45611	-0.28919	0.11215		0.88785
219405_at	TRIM68	tripartite motif-containing 68	0.82394	0.092811	-0.73113	0.0198		0.9802
219435_at	C17ORF68	chromosome 17 open reading frame 68	0.85115	-0.15407	-1.0052	0.0024	0.2	0.99905
219448_at	TMEM70	transmembrane protein 70	0.75169	0.33578	-0.41592	0.32545		0.67455
219449_s_at	TMEM70	transmembrane protein 70	0.12509	0.78692	0.66183	0.96885		0.03115
219463_at	C20ORF103	chromosome 20 open reading frame 103	0.58164	0.83368	0.25205	0.8688		0.1312
219485_s_at	PSMD10	proteasome (prosome, macropain) 26S subunit, non-ATPase, 10	0.49033	0.74649	0.25616	0.74125		0.25875
219495_s_at	ZNF180	zinc finger protein 180	0.51588	0.84987	0.33399	0.6581		0.3419
219540_at	ZNF267	zinc finger protein 267	0.48492	0.79086	0.30595	0.9258		0.0742
219550_at	ROBO3	roundabout, axon guidance receptor, homolog 3 (Drosophila)	0.82086	0.29622	-0.52464	0.02745		0.97255
219599_at	EIF4B	eukaryotic translation initiation factor 4B	0.70607	0.21678	-0.48928	0.02745		0.97255
219603_s_at	ZNF226	zinc finger protein 226	0.62254	0.81017	0.18764	0.77185		0.22815
219628_at	ZMAT3	zinc finger, matrin type 3	0.74541	0.5321	-0.21331	0.20965		0.79035
219646_at	DEF8	differentially expressed in FDCP 8 homolog (mouse)	0.37827	0.69706	0.31879	0.8657		0.1343
219683_at	FZD3	frizzled homolog 3 (Drosophila)	0.71895	0.69258	-0.026376	0.4598		0.5402
219688_at	BBS7	Bardet-Biedl syndrome 7	0.26016	0.80948	0.54932	0.9697		0.0303
219719_at	HIGD1B	HIG1 domain family, member 1B	0.47986	0.75973	0.27987	0.86875		0.13125
219750_at	TMEM144	transmembrane protein 144	0.77837	0.33398	-0.44439	0.13705		0.86295
219751_at	SETD6	SET domain containing 6	0.83874	0.6738	-0.16495	0.24525		0.75475
219762_s_at	RPL36(includesEG:25873)	ribosomal protein L36	0.15429	0.83858	0.68429	0.995		0.005	0.25
219799_s_at	DHRS9	dehydrogenase/reductase (SDR family) member 9	0.80423	0.71929	-0.084942	0.425		0.575
219816_s_at	RBM23	RNA binding motif protein 23	0.50855	0.70691	0.19837	0.7425		0.2575
219843_at	IPP	intracisternal A particle-promoted polypeptide	0.72083	0.62843	-0.0924	0.3494		0.6506
219884_at	LHX6	LIM homeobox 6	0.7319	0.82169	0.089788	0.76935		0.23065
219894_at	MAGEL2	MAGE-like 2	0.42191	0.69239	0.27048	0.86185		0.13815
219906_at	FLJ10213	hypothetical protein FLJ10213	0.49177	0.71411	0.22234	0.7477		0.25235
219945_at	DDX25	DEAD (Asp-Glu-Ala-Asp) box polypeptide 25	0.34977	0.74265	0.39287	0.92355		0.07645
219951_s_at	C20ORF12	chromosome 20 open reading frame 12	0.8235	0.28565	-0.53785	0.07455		0.92545
219960_s_at	UCHL5	ubiquitin carboxyl-terminal hydrolase L5	0.074938	0.71668	0.64175	0.9051		0.0949
219979_s_at	C11ORF73	chromosome 11 open reading frame 73	0.34587	0.74397	0.3981	0.9323		0.0677
219982_s_at	SERF1B	small EDRK-rich factor 1B (centromeric)	0.81387	0.85204	0.038171	0.62585		0.37415
220025_at	TBR1	T-box, brain, 1	-0.066106	0.83105	0.89716	0.97075		0.02925
220041_at	PIGZ(includesEG:80235)	phosphatidylinositol glycan anchor biosynthesis, class Z	0.18279	0.85084	0.66805	0.96975		0.03025
220122_at	MCTP1	multiple C2 domains, transmembrane 1	0.89576	0.5799	-0.31586	0.03335		0.96665
220148_at	ALDH8A1	aldehyde dehydrogenase 8 family, member A1	0.84923	0.73886	-0.11037	0.25475		0.74525
220150_s_at	FAM184A	family with sequence similarity 184, member A	0.42474	0.6945	0.26976	0.8239		0.1761
220160_s_at	KPTN	kaptin (actin binding protein)	0.88381	0.6902	-0.19361	0.3366		0.6634
220175_s_at	CBWD5	COBW domain containing 5	0.13755	0.72571	0.58816	0.95965		0.04035
220182_at	SLC25A23	solute carrier family 25 (mitochondrial carrier; phosphate carrier), member 23	0.72061	0.83993	0.11932	0.8058		0.1942
220261_s_at	ZDHHC4	zinc finger, DHHC-type containing 4	0.48064	0.75535	0.27471	0.85615		0.14385
220276_at	RERGL	RERG/RAS-like	0.73282	0.33766	-0.39516	0.08495		0.91505
220316_at	NPAS3	neuronal PAS domain protein 3	0.65786	0.69933	0.041476	0.5448		0.4552
220454_s_at	SEMA6A	sema domain, transmembrane domain (TM), and cytoplasmic domain, (semaphorin) 6A	0.66713	0.71898	0.051845	0.51645		0.48355
220495_s_at	TXNDC15	thioredoxin domain containing 15	0.42804	0.68874	0.2607	0.8487		0.1513
220584_at	FLJ22184	hypothetical protein FLJ22184	0.79209	0.66564	-0.12646	0.31005		0.68995
220631_at	OSGEPL1	O-sialoglycoprotein endopeptidase-like 1	0.3662	-0.71051	-1.0767	0.00115	0.2	0.9989
220648_at	ADARB2	adenosine deaminase, RNA-specific, B2 (RED2 homolog rat)	0.70226	0.7216	0.019341	0.50595		0.49405
220653_at	ZIM2	zinc finger, imprinted 2	0.98816	0.74161	-0.24654	0.3492		0.6508
220690_s_at	DHRS7B	dehydrogenase/reductase (SDR family) member 7B	0.3052	0.8105	0.5053	0.8723		0.12775
220773_s_at	GPHN	gephyrin	0.24844	0.68384	0.4354	0.98035		0.01965	0.3
220889_s_at	CA10	carbonic anhydrase X	0.40944	0.70417	0.29472	0.8587		0.1413
220890_s_at	DDX47	DEAD (Asp-Glu-Ala-Asp) box polypeptide 47	0.77037	0.4777	-0.29267	0.0796		0.9204
220964_s_at	RAB1B(includesEG:81876)	RAB1B, member RAS oncogene family	0.73339	-0.040386	-0.77378	0.03725		0.96275
220985_s_at	RNF170(includesEG:81790)	ring finger protein 170	0.81557	0.66948	-0.1461	0.21535		0.78465
220990_s_at	TMEM49	transmembrane protein 49	0.51886	0.75071	0.23185	0.83185		0.16815
221031_s_at	APOLD1	apolipoprotein L domain containing 1	0.82779	0.99306	0.16527	0.9662		0.0338
221045_s_at	PER3	period homolog 3 (Drosophila)	0.38362	0.77311	0.38949	0.90115		0.09885
221189_s_at	TARS2	threonyl-tRNA synthetase 2, mitochondrial (putative)	0.71975	0.14714	-0.57262	0.00925	0.3	0.99075
221193_s_at	ZCCHC10	zinc finger, CCHC domain containing 10	0.68583	-0.057215	-0.74305	0.0157		0.9843
221214_s_at	NELF	nasal embryonic LHRH factor	0.7145	0.67965	-0.034849	0.46185		0.53815
221219_s_at	KLHDC4(includesEG:54758)	kelch domain containing 4	0.47223	0.75318	0.28095	0.82995		0.17005
221229_s_at	FLJ20628	hypothetical protein FLJ20628	0.644	0.73643	0.09243	0.7383		0.2617
221230_s_at	ARID4B	AT rich interactive domain 4B (RBP1-like)	0.69906	0.14593	-0.55314	0.06865		0.93135
221246_x_at	TNS1	tensin 1	0.91638	-0.24591	-1.1623	0.00115	0.2	0.99885
221274_s_at	LMAN2L	lectin, mannose-binding 2-like	0.6226	0.7145	0.091895	0.6834		0.3166
221290_s_at	MUM1	melanoma associated antigen (mutated) 1	0.44509	0.71112	0.26604	0.86615		0.13385
221307_at	KCNIP1	Kv channel interacting protein 1	0.11891	0.70686	0.58795	0.9849		0.0151	0.3
221310_at	FGF14	fibroblast growth factor 14	0.46508	0.74259	0.27751	0.8569		0.1431
221428_s_at	TBL1XR1	transducin (beta)-like 1 X-linked receptor 1	0.70951	0.58079	-0.12872	0.32005		0.67995
221471_at	SERINC3	serine incorporator 3	0.71534	0.65442	-0.060921	0.40985		0.59015
221477_s_at	SOD2	superoxide dismutase 2, mitochondrial	0.66055	0.81012	0.14957	0.76175		0.23825
221485_at	B4GALT5	UDP-Gal:betaGlcNAc beta 1,4- galactosyltransferase, polypeptide 5	0.26329	0.7204	0.45712	0.92845		0.07155
221489_s_at	SPRY4	sprouty homolog 4 (Drosophila)	0.69317	0.45088	-0.24229	0.11875		0.88125
221496_s_at	TOB2	transducer of ERBB2, 2	0.74105	0.45823	-0.28281	0.3313		0.6687
221503_s_at	KPNA3	karyopherin alpha 3 (importin alpha 4)	0.23805	0.79477	0.55672	0.96815		0.03185
221513_s_at	UTP14A	UTP14, U3 small nucleolar ribonucleoprotein, homolog A (yeast)	0.81134	0.54744	-0.2639	0.1681		0.8319
221518_s_at	USP47	ubiquitin specific peptidase 47	0.75455	0.27166	-0.48289	0.0379		0.9621
221531_at	WDR61	WD repeat domain 61	0.49373	0.70894	0.21521	0.82375		0.17625
221532_s_at	WDR61	WD repeat domain 61	0.52271	0.73086	0.20815	0.71745		0.28255
221535_at	LSG1	large subunit GTPase 1 homolog (S. cerevisiae)	0.70765	0.24006	-0.46759	0.0655		0.9345
221559_s_at	MIS12	MIS12, MIND kinetochore complex component, homolog (yeast)	0.78293	0.1454	-0.63753	0.01675		0.98325
221570_s_at	METTL5	methyltransferase like 5	0.090134	0.78368	0.69354	0.80485		0.19515
221571_at	TRAF3	TNF receptor-associated factor 3	0.22972	0.70959	0.47987	0.9813		0.0187	0.3
221584_s_at	KCNMA1	potassium large conductance calcium-activated channel, subfamily M, alpha member 1	0.40234	0.78783	0.38549	0.9585		0.0415
221605_s_at	PIPOX	pipecolic acid oxidase	0.78296	0.31713	-0.46583	0.00865	0.25	0.99135
221620_s_at	APOO	apolipoprotein O	0.67662	0.78553	0.10891	0.68895		0.31105
221637_s_at	C11ORF48	chromosome 11 open reading frame 48	0.71715	0.31385	-0.4033	0.06855		0.93145
221646_s_at	ZDHHC11	zinc finger, DHHC-type containing 11	0.81835	0.8532	0.034848	0.6508		0.3492
221653_x_at	APOL2	apolipoprotein L, 2	0.70253	0.61152	-0.091006	0.28615		0.71385
221696_s_at	STYK1	serine/threonine/tyrosine kinase 1	0.47306	0.70684	0.23378	0.8643		0.1357
221731_x_at	VCAN	versican	0.83315	0.61278	-0.22038	0.2518		0.7482
221735_at	WDR48	WD repeat domain 48	0.80234	0.51171	-0.29063	0.1392		0.8608
221748_s_at	TNS1	tensin 1	0.75344	0.20581	-0.54764	0.0773		0.9227
221758_at	ARMC6	armadillo repeat containing 6	0.76775	0.087547	-0.68021	0.00315	0.2	0.99685
221795_at	NTRK2	neurotrophic tyrosine kinase, receptor, type 2	0.67273	0.82949	0.15676	0.71555		0.28445
221796_at	NTRK2	neurotrophic tyrosine kinase, receptor, type 2	0.63456	0.77387	0.13931	0.70915		0.29085
221801_x_at	NEFL	neurofilament, light polypeptide	-0.29811	0.79127	1.0894	0.9932		0.0068	0.25
221805_at	NEFL	neurofilament, light polypeptide	0.44309	0.70429	0.26121	0.78375		0.21625
221834_at	LONP2	lon peptidase 2, peroxisomal	0.6768	0.52228	-0.15452	0.23505		0.76495
221841_s_at	KLF4	Kruppel-like factor 4 (gut)	0.81275	0.92889	0.11615	0.83635		0.16365
221882_s_at	TMEM8	transmembrane protein 8 (five membrane-spanning domains)	0.30453	0.72072	0.41619	0.94945		0.05055
221885_at	DENND2A	DENN/MADD domain containing 2A	0.10121	0.78396	0.68275	0.82485		0.1752
221895_at	MOSPD2	motile sperm domain containing 2	0.70271	0.60675	-0.095968	0.3179		0.6821
221916_at	NEFL	neurofilament, light polypeptide	0.052997	0.75112	0.69812	0.9376		0.0624
221920_s_at	SLC25A37	solute carrier family 25, member 37	0.48683	0.80363	0.3168	0.9254		0.0746
221922_at	GPSM2	G-protein signaling modulator 2 (AGS3-like, C. elegans)	0.71208	0.59485	-0.11724	0.2813		0.7187
221928_at	ACACB	acetyl-Coenzyme A carboxylase beta	0.52231	0.77345	0.25113	0.7302		0.2698
221938_x_at	MED16	mediator complex subunit 16	0.75793	0.455	-0.30292	0.0825		0.9175
221951_at	TMEM80	transmembrane protein 80	0.82091	0.65227	-0.16864	0.237		0.763
221992_at	LOC440348	similar to nuclear pore complex interacting protein	0.83288	0.63398	-0.19891	0.1769		0.8231
222001_x_at	FAM91A2	family with sequence similarity 91, member A2	0.1562	0.8174	0.6612	0.97535		0.02465
222011_s_at	TCP1	t-complex 1	0.50439	0.8344	0.33001	0.86865		0.13135
222024_s_at	AKAP13	A kinase (PRKA) anchor protein 13	0.47919	0.76581	0.28662	0.83825		0.16175
222027_at	NUCKS1	nuclear casein kinase and cyclin-dependent kinase substrate 1	0.80381	0.56009	-0.24371	0.1202		0.8798
222036_s_at	MCM4	minichromosome maintenance complex component 4	0.25916	0.71609	0.45693	0.9617		0.0383
222043_at	CLU	clusterin	0.58006	0.69617	0.11611	0.64785		0.35215
222047_s_at	ARS2	arsenate resistance protein 2	0.73162	0.48874	-0.24288	0.12125		0.87875
222070_at	DND1	dead end homolog 1 (zebrafish)	0.51003	0.75304	0.24301	0.78095		0.21905
222113_s_at	EPS15L1	epidermal growth factor receptor pathway substrate 15-like 1	0.78309	0.65855	-0.12454	0.2953		0.7047
222162_s_at	ADAMTS1	ADAM metallopeptidase with thrombospondin type 1 motif, 1	0.85034	0.84147	-0.0088644	0.43475		0.56525
222199_s_at	BIN3	bridging integrator 3	0.31124	0.70223	0.39099	0.81105		0.18895
222274_at	FLJ31568	zinc finger, DHHC-type containing 8 pseudogene	0.65716	0.82133	0.16417	0.8494		0.1506
222301_at	C1ORF61	chromosome 1 open reading frame 61	0.87408	0.56234	-0.31173	0.0987		0.9013
222380_s_at	PDCD6	programmed cell death 6	0.53152	0.73258	0.20106	0.7561		0.2439
222386_s_at	COPZ1	coatomer protein complex, subunit zeta 1	0.37393	0.72888	0.35495	0.89105		0.10895
222393_s_at	NAT13	N-acetyltransferase 13 (GCN5-related)	0.73421	0.4416	-0.29261	0.20905		0.79095
222396_at	HN1	hematological and neurological expressed 1	0.4277	0.76865	0.34095	0.8394		0.1606
222423_at	NDFIP1	Nedd4 family interacting protein 1	0.0028742	0.72977	0.7269	0.97785		0.02215	0.3
222449_at	PMEPA1	prostate transmembrane protein, androgen induced 1	0.066154	0.76465	0.6985	0.9811		0.0189	0.3
222458_s_at	AKIRIN1	akirin 1	0.5529	0.68086	0.12795	0.7152		0.2848
222472_at	AFTPH	aftiphilin	0.51074	0.69924	0.18849	0.7672		0.2328
222479_s_at	DYNC1LI1	dynein, cytoplasmic 1, light intermediate chain 1	0.68667	0.78859	0.10192	0.74435		0.25565
222486_s_at	ADAMTS1	ADAM metallopeptidase with thrombospondin type 1 motif, 1	0.85184	0.89939	0.047553	0.57185		0.42815
222499_at	MRPS16	mitochondrial ribosomal protein S16	0.71376	0.34153	-0.37223	0.10865		0.89135
222503_s_at	WDR41	WD repeat domain 41	0.56612	0.78052	0.2144	0.7747		0.2253
222505_at	LMBR1	limb region 1 homolog (mouse)	0.78098	0.61972	-0.16125	0.23315		0.76685
222558_at	RPRD1A	regulation of nuclear pre-mRNA domain containing 1A	0.65805	0.75933	0.10127	0.6137		0.3863
222571_at	ST6GALNAC6	ST6 (alpha-N-acetyl-neuraminyl-2,3-beta-galactosyl-1,3)-N-acetylgalactosaminide alpha-2,6-sialyltransferase 6	0.35519	0.83226	0.47707	0.96855		0.03145
222578_s_at	UBA5	ubiquitin-like modifier activating enzyme 5	0.71847	0.66083	-0.057632	0.36295		0.63705
222579_at	UBA5	ubiquitin-like modifier activating enzyme 5	0.77588	0.77884	0.0029619	0.5065		0.4935
222582_at	PRKAG2	protein kinase, AMP-activated, gamma 2 non-catalytic subunit	0.51316	0.72148	0.20832	0.8608		0.1392
222586_s_at	OSBPL11	oxysterol binding protein-like 11	0.92469	0.41339	-0.5113	0.075		0.925
222622_at	PGP	phosphoglycolate phosphatase	-0.045096	0.70129	0.74639	0.99565		0.00435	0.25
222629_at	REV1	REV1 homolog (S. cerevisiae)	0.78394	0.15699	-0.62696	0.0586		0.9414
222637_at	COMMD10	COMM domain containing 10	0.39515	0.74866	0.35351	0.8998		0.1002
222651_s_at	TRPS1	trichorhinophalangeal syndrome I	0.7006	0.19519	-0.50541	0.05745		0.94255
222654_at	IMPAD1	inositol monophosphatase domain containing 1	0.69182	0.7577	0.065884	0.65945		0.34055
222659_at	IPO11	importin 11	0.73567	-0.13464	-0.87031	0.076		0.924
222663_at	RIOK2	RIO kinase 2 (yeast)	0.81544	-0.2752	-1.0906	0.0013	0.2	0.9987
222683_at	RNF20	ring finger protein 20	0.71702	-0.19878	-0.9158	0.00145	0.2	0.99855
222688_at	PHCA	alkaline ceramidase 3	0.62239	0.70126	0.078862	0.62425		0.37575
222717_at	SDPR	serum deprivation response (phosphatidylserine binding protein)	0.86239	0.83482	-0.027571	0.42725		0.57275
222734_at	WARS2	tryptophanyl tRNA synthetase 2, mitochondrial	0.79387	0.76276	-0.031104	0.5064		0.4936
222735_at	TMEM38B	transmembrane protein 38B	0.77932	0.26831	-0.511	0.05215		0.94785
222742_s_at	RABL5	RAB, member RAS oncogene family-like 5	0.22996	0.83491	0.60496	0.9828		0.0172	0.3
222750_s_at	SRD5A3	steroid 5 alpha-reductase 3	0.73085	0.14971	-0.58115	0.0486		0.9514
222754_at	TRNT1	tRNA nucleotidyl transferase, CCA-adding, 1	0.55539	0.69077	0.13537	0.6852		0.3148
222764_at	ASRGL1	asparaginase like 1	0.26942	0.75264	0.48323	0.87745		0.12255
222774_s_at	NETO2	neuropilin (NRP) and tolloid (TLL)-like 2	0.15353	0.77292	0.61939	0.9926		0.0074	0.25
222780_s_at	BAALC	brain and acute leukemia, cytoplasmic	0.81431	0.78022	-0.034086	0.359		0.641
222784_at	SMOC1	SPARC related modular calcium binding 1	0.74012	0.34426	-0.39586	0.27385		0.72615
222788_s_at	RSBN1	round spermatid basic protein 1	0.7256	0.37255	-0.35305	0.1865		0.8135
222794_x_at	PAPD1	PAP associated domain containing 1	0.75634	0.75298	-0.0033599	0.4895		0.5105
222801_s_at	STAG3L4	stromal antigen 3-like 4	0.25185	0.73864	0.48679	0.994		0.006	0.25
222802_at	EDN1	endothelin 1	0.94383	0.77608	-0.16775	0.1105		0.8895
222816_s_at	ZCCHC2	zinc finger, CCHC domain containing 2	0.58482	0.88217	0.29735	0.96685		0.03315
222851_at	ZNF654	zinc finger protein 654	0.77177	0.36448	-0.40729	0.07475		0.92525
222852_at	C10ORF88	chromosome 10 open reading frame 88	-0.72718	-0.2687	0.45848	0.95175		0.04825
222867_s_at	MED31	mediator complex subunit 31	0.15822	0.7384	0.58018	0.97885		0.02115	0.3
222883_at	C1ORF163	chromosome 1 open reading frame 163	0.69825	0.61901	-0.079234	0.3573		0.6427
222889_at	DCLRE1B	DNA cross-link repair 1B (PSO2 homolog, S. cerevisiae)	0.90292	0.54797	-0.35495	0.01395		0.98605
222906_at	FLVCR1	feline leukemia virus subgroup C cellular receptor 1	0.77619	0.15515	-0.62104	0.05025		0.94975
222982_x_at	SLC38A2	solute carrier family 38, member 2	0.77164	0.29758	-0.47406	0.08985		0.91015
222984_at	PAIP2	poly(A) binding protein interacting protein 2	0.61136	0.75686	0.14549	0.6179		0.3821
222985_at	YWHAG	tyrosine 3-monooxygenase/tryptophan 5-monooxygenase activation protein, gamma polypeptide	-0.076288	0.7511	0.82738	0.99335		0.00665	0.25
222990_at	UBQLN1	ubiquilin 1	0.6062	0.85224	0.24604	0.8213		0.1787
223000_s_at	F11R	F11 receptor	0.35642	0.70599	0.34957	0.81655		0.18345
223011_s_at	OCIAD1	OCIA domain containing 1	0.58879	0.77184	0.18305	0.71855		0.28145
223015_at	EIF2A	eukaryotic translation initiation factor 2A, 65kDa	0.62911	0.82269	0.19358	0.81285		0.18715
223043_at	TMEM85	transmembrane protein 85	0.62492	0.70978	0.084862	0.5946		0.4054
223046_at	EGLN1	egl nine homolog 1 (C. elegans)	0.58633	0.68931	0.10298	0.68855		0.31145
223059_s_at	FAM107B	family with sequence similarity 107, member B	0.73682	0.41056	-0.32626	0.02385		0.97615
223063_at	C1ORF198	chromosome 1 open reading frame 198	0.81874	0.40485	-0.41389	0.0659		0.9341
223073_at	HIATL1	hippocampus abundant transcript-like 1	0.32106	0.80494	0.48387	0.9939		0.0061	0.25
223076_s_at	NSUN2	NOL1/NOP2/Sun domain family, member 2	0.19233	0.71069	0.51836	0.89355		0.10645
223088_x_at	ECHDC1	enoyl Coenzyme A hydratase domain containing 1	0.75073	0.40615	-0.34458	0.10985		0.89015
223093_at	ANKH	ankylosis, progressive homolog (mouse)	0.7166	0.38278	-0.33383	0.1564		0.8436
223101_s_at	ARPC5L(includesEG:81873)	actin related protein 2/3 complex, subunit 5-like	0.57417	0.78447	0.2103	0.7444		0.2556
223134_at	BBX	bobby sox homolog (Drosophila)	0.73286	0.60815	-0.12471	0.27675		0.72325
223167_s_at	USP25	ubiquitin specific peptidase 25	0.22673	0.70696	0.48022	0.98565		0.01435	0.3
223168_at	RHOU	ras homolog gene family, member U	0.73449	0.42441	-0.31008	0.23575		0.76425
223174_at	BTBD10	BTB (POZ) domain containing 10	0.38745	0.76041	0.37296	0.72265		0.27735
223189_x_at	MLL5	myeloid/lymphoid or mixed-lineage leukemia 5 (trithorax homolog, Drosophila)	0.76173	-0.014496	-0.77623	0.00065	0.15	0.99935
223210_at	CHURC1	churchill domain containing 1	0.77431	0.77608	0.0017734	0.5143		0.4857
223217_s_at	NFKBIZ	nuclear factor of kappa light polypeptide gene enhancer in B-cells inhibitor, zeta	0.52597	0.72808	0.20211	0.63745		0.36255
223221_at	SCO1	SCO cytochrome oxidase deficient homolog 1 (yeast)	0.31687	0.69138	0.37451	0.92085		0.07915
223231_at	TATDN1(includesEG:83940)	TatD DNase domain containing 1	0.40033	0.7527	0.35237	0.81945		0.18055
223239_at	C14ORF129	chromosome 14 open reading frame 129	0.64243	0.83003	0.18761	0.93025		0.06975
223248_at	HSDL1	hydroxysteroid dehydrogenase like 1	0.73071	0.47013	-0.26059	0.15255		0.84745
223251_s_at	ANKRD10	ankyrin repeat domain 10	0.72629	0.57069	-0.15559	0.3267		0.6733
223253_at	EPDR1	ependymin related protein 1 (zebrafish)	0.21368	0.75281	0.53913	0.9222		0.0778
223271_s_at	CTDSPL2	CTD (carboxy-terminal domain, RNA polymerase II, polypeptide A) small phosphatase like 2	0.68942	0.31766	-0.37177	0.15825		0.84175
223295_s_at	LUC7L	LUC7-like (S. cerevisiae)	0.60505	0.72814	0.12308	0.66425		0.33575
223296_at	SLC25A33	solute carrier family 25, member 33	0.78474	0.50707	-0.27767	0.14135		0.85865
223298_s_at	NT5C3	5'-nucleotidase, cytosolic III	0.17768	0.79849	0.6208	0.98075		0.01925	0.3
223299_at	SEC11C	SEC11 homolog C (S. cerevisiae)	0.76062	0.50101	-0.25962	0.21915		0.78085
223320_s_at	ABCB10	ATP-binding cassette, sub-family B (MDR/TAP), member 10	0.041659	0.80036	0.7587	0.9938		0.0062	0.25
223325_at	TXNDC11	thioredoxin domain containing 11	0.22884	0.71523	0.48639	0.9633		0.0367
223328_at	ARMC10	armadillo repeat containing 10	0.45243	0.76374	0.31132	0.8447		0.1553
223334_at	TMEM126A	transmembrane protein 126A	0.4653	0.71214	0.24684	0.74485		0.25515
223354_x_at	MFF	mitochondrial fission factor	0.38842	0.78508	0.39665	0.87875		0.12125
223360_at	C21ORF56	chromosome 21 open reading frame 56	0.59788	0.71287	0.11499	0.83335		0.16665
223376_s_at	BRI3	brain protein I3	-0.37666	0.75309	1.1298	0.9985		0.0015	0.2
223380_s_at	LATS2	LATS, large tumor suppressor, homolog 2 (Drosophila)	0.68674	0.12423	-0.56251	0.0291		0.9709
223405_at	NPL	N-acetylneuraminate pyruvate lyase (dihydrodipicolinate synthase)	0.72495	0.53691	-0.18804	0.2696		0.7304
223406_x_at	NIP30	NEFA-interacting nuclear protein NIP30	0.39052	0.66996	0.27944	0.84365		0.15635
223409_at	FOXK2	forkhead box K2	0.70238	0.32136	-0.38102	0.19975		0.80025
223441_at	SLC17A5	solute carrier family 17 (anion/sugar transporter), member 5	0.64161	0.69706	0.055445	0.5503		0.4497
223467_at	RASD1	RAS, dexamethasone-induced 1	0.68503	0.87023	0.1852	0.86		0.14
223471_at	RAB3IP	RAB3A interacting protein (rabin3)	0.8746	0.89073	0.016122	0.5446		0.4554
223475_at	CRISPLD1	cysteine-rich secretory protein LCCL domain containing 1	0.8869	-0.36496	-1.2519	0.05185		0.94815
223515_s_at	COQ3	coenzyme Q3 homolog, methyltransferase (S. cerevisiae)	0.74545	0.71406	-0.031391	0.41305		0.58695
223530_at	TDRKH	tudor and KH domain containing	0.34763	0.71111	0.36349	0.8884		0.1116
223534_s_at	RPS6KL1	ribosomal protein S6 kinase-like 1	0.6948	0.49784	-0.19696	0.1831		0.8169
223538_at	SERF1A	small EDRK-rich factor 1A (telomeric)	0.75932	0.84552	0.086205	0.68615		0.31385
223539_s_at	SERF1A	small EDRK-rich factor 1A (telomeric)	0.63172	0.75522	0.1235	0.72465		0.27535
223573_s_at	PPP2R2C	protein phosphatase 2 (formerly 2A), regulatory subunit B, gamma isoform	0.88794	0.86956	-0.018381	0.41855		0.58145
223574_x_at	PPP2R2C	protein phosphatase 2 (formerly 2A), regulatory subunit B, gamma isoform	0.90063	0.88085	-0.019778	0.4196		0.5804
223576_at	C6ORF203	chromosome 6 open reading frame 203	0.48385	0.76464	0.28079	0.9418		0.0582
223588_at	THAP2	THAP domain containing, apoptosis associated protein 2	0.71062	0.21545	-0.49517	0.0475		0.9525
223598_at	RAD23B	RAD23 homolog B (S. cerevisiae)	0.76311	0.52973	-0.23338	0.2358		0.7642
223614_at	C8ORF57	chromosome 8 open reading frame 57	0.70744	0.20921	-0.49823	0.05655		0.94345
223626_x_at	IFI27L2	interferon, alpha-inducible protein 27-like 2	0.49042	0.69928	0.20886	0.8759		0.1241
223628_at	TMEM191B	transmembrane protein 191B	0.40752	0.87373	0.46621	0.99445		0.00555	0.25
223634_at	RASD2	RASD family, member 2	0.81314	0.51776	-0.29538	0.0958		0.9042
223650_s_at	NRBF2	nuclear receptor binding factor 2	0.41283	0.81975	0.40692	0.91335		0.08665
223671_x_at	DPH5	DPH5 homolog (S. cerevisiae)	0.25541	0.70331	0.44789	0.7865		0.2135
223673_at	RFX4	regulatory factor X, 4 (influences HLA class II expression)	0.74582	0.19595	-0.54987	0.1091		0.8909
223744_s_at	SIAE	sialic acid acetylesterase	0.70106	0.37579	-0.32528	0.21885		0.78115
223758_s_at	GTF2H2	general transcription factor IIH, polypeptide 2, 44kDa	0.77295	0.72962	-0.043332	0.48155		0.51845
223799_at	KIAA1826	KIAA1826	0.11775	0.69751	0.57977	0.89495		0.10505
223802_s_at	RBBP6(includesEG:5930)	retinoblastoma binding protein 6	0.79361	0.46042	-0.33319	0.0761		0.9239
223842_s_at	SCARA3	scavenger receptor class A, member 3	0.73938	0.33585	-0.40353	0.0558		0.9442
223843_at	SCARA3	scavenger receptor class A, member 3	0.76544	0.2223	-0.54314	0.03035		0.96965
223894_s_at	AKTIP	AKT interacting protein	0.25579	0.70061	0.44482	0.9241		0.0759
223913_s_at	C19ORF30	chromosome 19 open reading frame 30	0.61857	0.77692	0.15835	0.75995		0.24005
223989_s_at	REXO2	REX2, RNA exonuclease 2 homolog (S. cerevisiae)	0.7001	-0.065415	-0.76551	0.0168		0.9832
224129_s_at	DPY30	dpy-30 homolog (C. elegans)	0.14449	0.74265	0.59815	0.96415		0.03585
224164_at	TPM3	tropomyosin 3	0.28098	0.75614	0.47516	0.9561		0.0439
224184_s_at	BOC	Boc homolog (mouse)	0.19317	0.69575	0.50258	0.9738		0.0262
224187_x_at	HSPA8	heat shock 70kDa protein 8	0.7262	0.76655	0.040348	0.55295		0.44705
224233_s_at	MSTO1	misato homolog 1 (Drosophila)	0.69807	0.30353	-0.39454	0.1391		0.86095
224247_s_at	MRPS10	mitochondrial ribosomal protein S10	0.69204	0.49084	-0.2012	0.2256		0.7744
224281_s_at	NGRN	neugrin, neurite outgrowth associated	0.79858	0.77446	-0.024122	0.45985		0.54015
224319_s_at	SMCR7L	Smith-Magenis syndrome chromosome region, candidate 7-like	0.71657	0.30157	-0.415	0.13645		0.86355
224326_s_at	PCGF6	polycomb group ring finger 6	0.71481	0.27881	-0.436	0.1324		0.8676
224331_s_at	MRPL36	mitochondrial ribosomal protein L36	0.49482	0.76178	0.26696	0.8312		0.1688
224352_s_at	CFL2	cofilin 2 (muscle)	0.71284	0.5634	-0.14943	0.1778		0.8222
224364_s_at	PPIL3	peptidylprolyl isomerase (cyclophilin)-like 3	0.62794	0.76767	0.13974	0.7999		0.2001
224367_at	BEX2	brain expressed X-linked 2	0.56426	0.70055	0.13628	0.68045		0.31955
224368_s_at	NDRG3	NDRG family member 3	0.70509	0.75846	0.053377	0.58375		0.41625
224373_s_at	HNRNPM	heterogeneous nuclear ribonucleoprotein M	0.72687	-0.31272	-1.0396	0.0009	0.15	0.9991
224391_s_at	SIAE	sialic acid acetylesterase	0.062019	0.72213	0.66012	0.98945		0.01055	0.3
224397_s_at	TMTC1	transmembrane and tetratricopeptide repeat containing 1	-0.38946	0.84436	1.2338	0.99925		0.00075	0.15
224413_s_at	TM2D2	TM2 domain containing 2	0.67053	0.73935	0.068819	0.543		0.457
224458_at	C9ORF125	chromosome 9 open reading frame 125	0.70743	0.33613	-0.3713	0.22405		0.77595
224474_x_at	SMEK2	SMEK homolog 2, suppressor of mek1 (Dictyostelium)	0.21992	0.73552	0.5156	0.92325		0.07675
224476_s_at	MESP1	mesoderm posterior 1 homolog (mouse)	0.21047	0.696	0.48553	0.9351		0.0649
224497_x_at	HSD17B14	hydroxysteroid (17-beta) dehydrogenase 14	0.59308	0.78153	0.18845	0.9217		0.07835
224519_at	LOC100132167	similar to hCG1993567	0.7876	0.31511	-0.47249	0.03075		0.96925
224523_s_at	C3ORF26	chromosome 3 open reading frame 26	0.69581	0.69281	-0.0029931	0.47585		0.52415
224525_s_at	OLA1	Obg-like ATPase 1	0.78061	0.78246	0.0018515	0.49635		0.50365
224535_s_at	MRP63	mitochondrial ribosomal protein 63	0.7242	0.67342	-0.05078	0.39475		0.60525
224550_s_at	MRVI1	murine retrovirus integration site 1 homolog	0.85669	0.93736	0.080669	0.81575		0.18425
224559_at	MALAT1	metastasis associated lung adenocarcinoma transcript 1 (non-protein coding)	0.7933	0.56309	-0.23021	0.19065		0.80935
224560_at	TIMP2	TIMP metallopeptidase inhibitor 2	0.76021	0.61093	-0.14927	0.2531		0.7469
224565_at	NCRNA00084	non-protein coding RNA 84	0.67767	0.89235	0.21468	0.931		0.069
224566_at	NCRNA00084	non-protein coding RNA 84	0.90465	0.78586	-0.11879	0.138		0.862
224571_at	IRF2BP2	interferon regulatory factor 2 binding protein 2	0.89308	0.25486	-0.63822	0.00045	0.15	0.99955
224581_s_at	NUCKS1	nuclear casein kinase and cyclin-dependent kinase substrate 1	0.7628	0.43458	-0.32822	0.0625		0.9375
224582_s_at	NUCKS1	nuclear casein kinase and cyclin-dependent kinase substrate 1	0.76745	0.43956	-0.32789	0.0756		0.9244
224595_at	SLC44A1	solute carrier family 44, member 1	0.82402	0.76599	-0.058027	0.4353		0.5647
224600_at	CGGBP1	CGG triplet repeat binding protein 1	0.69313	0.53622	-0.15691	0.2332		0.7668
224610_at	SNHG1	small nucleolar RNA host gene 1 (non-protein coding)	0.80315	0.11794	-0.68521	0.0283		0.9717
224623_at	THOC3	THO complex 3	0.4991	0.90726	0.40816	0.97625		0.02375	0.3
224649_x_at	CCNY	cyclin Y	0.36362	0.83554	0.47192	0.991		0.009	0.3
224650_at	MAL2	mal, T-cell differentiation protein 2	0.50944	0.70299	0.19355	0.74645		0.25355
224654_at	DDX21	DEAD (Asp-Glu-Ala-Asp) box polypeptide 21	0.77136	-0.32045	-1.0918	0.0015	0.2	0.9985
224657_at	ERRFI1	ERBB receptor feedback inhibitor 1	0.77846	0.28166	-0.4968	0.105		0.895
224665_at	C10ORF104	chromosome 10 open reading frame 104	0.77773	0.47673	-0.301	0.1553		0.8447
224675_at	MESDC2	mesoderm development candidate 2	0.72169	0.32859	-0.3931	0.0765		0.9235
224698_at	FAM62B	family with sequence similarity 62 (C2 domain containing) member B	0.061284	0.73403	0.67275	0.99495		0.00505	0.25
224706_at	KIAA2013	KIAA2013	0.078953	0.73537	0.65642	0.99875		0.00125	0.2
224719_s_at	C12ORF57	chromosome 12 open reading frame 57	0.60257	0.77966	0.17708	0.83485		0.16515
224736_at	CCAR1	cell division cycle and apoptosis regulator 1	0.72541	0.14169	-0.58372	0.1463		0.8537
224741_x_at	GAS5	growth arrest-specific 5 (non-protein coding)	0.052391	0.90692	0.85453	0.95875		0.04125
224754_at	SP1	Sp1 transcription factor	-0.080265	0.72695	0.80721	0.9444		0.0556
224759_s_at	C12ORF23	chromosome 12 open reading frame 23	0.31881	0.75995	0.44114	0.8361		0.1639
224760_at	SP1	Sp1 transcription factor	0.50639	0.69635	0.18996	0.7497		0.2503
224761_at	GNA13	guanine nucleotide binding protein (G protein), alpha 13	0.81617	0.32867	-0.48751	0.0577		0.9423
224777_s_at	PAFAH1B2	platelet-activating factor acetylhydrolase, isoform Ib, beta subunit 30kDa	0.36355	0.83275	0.4692	0.95		0.05
224781_s_at	RBM17	RNA binding motif protein 17	0.73238	-0.027562	-0.75994	0.13605		0.86395
224789_at	WDR40A	WD repeat domain 40A	0.77453	0.46263	-0.31191	0.07305		0.92695
224797_at	ARRDC3	arrestin domain containing 3	0.7253	0.85728	0.13198	0.8987		0.1013
224800_at	WDFY1	WD repeat and FYVE domain containing 1	0.65558	0.71626	0.060681	0.6388		0.3612
224823_at	MYLK	myosin light chain kinase	0.72333	0.5123	-0.21103	0.16205		0.83795
224827_at	UBTD2	ubiquitin domain containing 2	0.36707	0.72415	0.35709	0.91735		0.08265
224828_at	CPEB4	cytoplasmic polyadenylation element binding protein 4	0.88759	0.79147	-0.096124	0.1656		0.8344
224829_at	CPEB4	cytoplasmic polyadenylation element binding protein 4	0.6418	0.79573	0.15394	0.82015		0.17985
224836_at	TP53INP2	tumor protein p53 inducible nuclear protein 2	0.39145	0.67736	0.28592	0.95465		0.04535
224837_at	FOXP1	forkhead box P1	-0.17339	0.69039	0.86379	0.9762		0.0238	0.3
224840_at	FKBP5	FK506 binding protein 5	0.89986	0.58177	-0.31808	0.1217		0.8783
224841_x_at	GAS5	growth arrest-specific 5 (non-protein coding)	-0.020855	0.91474	0.9356	0.90915		0.09085
224844_at	SLAIN2	SLAIN motif family, member 2	0.72289	0.074493	-0.6484	0.1097		0.8903
224851_at	CDK6	cyclin-dependent kinase 6	0.52089	0.71738	0.19649	0.75915		0.24085
224884_at	AKAP13	A kinase (PRKA) anchor protein 13	0.18947	0.79992	0.61045	0.9104		0.0896
224897_at	WDR26	WD repeat domain 26	0.75937	-0.23559	-0.99496	0.0034	0.2	0.9966
224902_at	PDPR	pyruvate dehydrogenase phosphatase regulatory subunit	0.74	0.78822	0.048223	0.60205		0.39795
224904_at	PDPR	pyruvate dehydrogenase phosphatase regulatory subunit	0.59124	0.79761	0.20637	0.8295		0.1705
224917_at	MIRN21(includesEG:406991)	microRNA 21	0.7096	0.91618	0.20658	0.7672		0.2328
224919_at	MRPS6(includesEG:64968)	mitochondrial ribosomal protein S6	0.48952	0.82371	0.33419	0.90505		0.09495
224953_at	YIPF5	Yip1 domain family, member 5	0.66599	0.74641	0.080424	0.57985		0.42015
224959_at	SLC26A2	solute carrier family 26 (sulfate transporter), member 2	0.96644	0.64234	-0.32411	0.1765		0.8235
224968_at	CCDC104	coiled-coil domain containing 104	0.70998	0.59878	-0.1112	0.29505		0.70495
224977_at	C6ORF89	chromosome 6 open reading frame 89	0.094634	0.72651	0.63187	0.98425		0.01575	0.3
224993_at	MLLT1	myeloid/lymphoid or mixed-lineage leukemia (trithorax homolog, Drosophila); translocated to, 1	0.39845	0.70373	0.30528	0.9572		0.0428
225003_at	TMEM205	transmembrane protein 205	0.69848	0.26576	-0.43272	0.1906		0.8094
225014_at	LOC389203	hypothetical gene supported by BC032431	0.84263	0.26448	-0.57816	0.01105	0.3	0.98895
225018_at	SPIRE1	spire homolog 1 (Drosophila)	0.77331	0.31285	-0.46046	0.0341		0.9659
225029_at	LOC550643	hypothetical LOC550643	0.34074	0.8695	0.52877	0.96995		0.03005
225030_at	FAM44B	family with sequence similarity 44, member B	0.52186	0.70678	0.18492	0.69645		0.30355
225035_x_at	WASH1	WAS protein family homolog 1	0.76122	0.69207	-0.069154	0.37315		0.62685
225046_at	LOC100132181	hypothetical protein LOC100132181	0.97604	0.93708	-0.038966	0.12625		0.87375
225062_at	LOC100132181	hypothetical protein LOC100132181	0.92308	0.96177	0.038689	0.65965		0.34035
225064_at	RABEP1	rabaptin, RAB GTPase binding effector protein 1	0.74961	0.76033	0.010725	0.57405		0.42595
225079_at	EMP2	epithelial membrane protein 2	0.76723	0.62429	-0.14294	0.2963		0.7037
225092_at	RABEP1	rabaptin, RAB GTPase binding effector protein 1	0.63476	0.79176	0.15699	0.8326		0.1674
225097_at	HIPK2	homeodomain interacting protein kinase 2	0.58515	0.83315	0.248	0.71515		0.28485
225105_at	LOC387882	overexpressed in colon carcinoma-1	0.30501	0.77164	0.46664	0.9368		0.0632
225115_at	HIPK2	homeodomain interacting protein kinase 2	0.75086	0.74703	-0.0038305	0.45985		0.54015
225116_at	HIPK2	homeodomain interacting protein kinase 2	0.65058	0.88675	0.23617	0.768		0.232
225144_at	BMPR2	bone morphogenetic protein receptor, type II (serine/threonine kinase)	0.51675	0.87424	0.35749	0.86595		0.13405
225155_at	SNHG5	small nucleolar RNA host gene 5 (non-protein coding)	0.61866	0.78679	0.16814	0.6889		0.3111
225160_x_at	MGC5370	hypothetical protein MGC5370	0.72092	0.19606	-0.52486	0.05475		0.94525
225164_s_at	EIF2AK4	eukaryotic translation initiation factor 2 alpha kinase 4	0.54155	0.70085	0.15929	0.876		0.124
225167_at	FRMD4A	FERM domain containing 4A	0.37591	0.70189	0.32598	0.85645		0.14355
225183_at	C16ORF72	chromosome 16 open reading frame 72	0.74112	0.58499	-0.15613	0.23295		0.76705
225193_at	KIAA1967	KIAA1967	0.86246	0.65083	-0.21162	0.11695		0.88305
225200_at	DPH3	DPH3, KTI11 homolog (S. cerevisiae)	0.6843	0.45205	-0.23225	0.14625		0.85375
225207_at	PDK4	pyruvate dehydrogenase kinase, isozyme 4	0.9146	0.56345	-0.35115	0.01495		0.98505
225214_at	PSMB7	proteasome (prosome, macropain) subunit, beta type, 7	0.35671	0.77455	0.41783	0.9576		0.0424
225222_at	HIAT1(includesEG:64645)	hippocampus abundant transcript 1	0.64527	0.76743	0.12216	0.75985		0.24015
225236_at	RBM18	RNA binding motif protein 18	0.28355	0.77857	0.49503	0.98365		0.01635	0.3
225243_s_at	SLMAP	sarcolemma associated protein	0.36754	0.77092	0.40338	0.89945		0.10055
225246_at	STIM2	stromal interaction molecule 2	0.63924	0.80835	0.16911	0.83375		0.16625
225266_at	ZNF652	zinc finger protein 652	0.73894	0.30589	-0.43304	0.1054		0.8946
225290_at	ETNK1	ethanolamine kinase 1	0.21046	0.70731	0.49685	0.9902		0.0098	0.3
225300_at	C15ORF23	chromosome 15 open reading frame 23	0.85276	0.57546	-0.27731	0.10145		0.89855
225304_s_at	NDUFA11	NADH dehydrogenase (ubiquinone) 1 alpha subcomplex, 11, 14.7kDa	0.71746	0.63317	-0.084286	0.38195		0.61805
225315_at	MRPL21	mitochondrial ribosomal protein L21	0.33296	0.73941	0.40646	0.977		0.023	0.3
225321_s_at	PILRB(includesEG:29990)	paired immunoglobin-like type 2 receptor beta	0.74811	0.49706	-0.25105	0.30455		0.69545
225330_at	IGF1R	insulin-like growth factor 1 receptor	0.59556	0.69495	0.09939	0.71425		0.28575
225338_at	ZYG11B	zyg-11 homolog B (C. elegans)	0.58807	0.7486	0.16053	0.65405		0.34595
225353_s_at	C1QC	complement component 1, q subcomponent, C chain	0.78377	0.67593	-0.10785	0.20835		0.79165
225373_at	C10ORF54	chromosome 10 open reading frame 54	0.64931	0.8088	0.15949	0.7724		0.2276
225381_at	LOC399959	hypothetical gene supported by BX647608	-0.16311	0.74774	0.91085	0.9966		0.0034	0.25
225382_at	ZNF275	zinc finger protein 275	0.39958	0.83808	0.4385	0.88025		0.11975
225392_at	GFM2	G elongation factor, mitochondrial 2	0.29347	0.74333	0.44986	0.9808		0.0192	0.3
225397_at	C15ORF57	chromosome 15 open reading frame 57	0.61417	0.70476	0.09059	0.70195		0.29805
225413_at	USMG5	up-regulated during skeletal muscle growth 5 homolog (mouse)	0.67665	0.62766	-0.048997	0.3753		0.6247
225414_at	RNF149	ring finger protein 149	0.23304	0.72475	0.49171	0.9145		0.0855
225415_at	DTX3L	deltex 3-like (Drosophila)	0.82373	0.18978	-0.63395	0.0158		0.9842
225425_s_at	MRPL41	mitochondrial ribosomal protein L41	0.37233	0.77648	0.40415	0.96515		0.03485
225426_at	PPP6C	protein phosphatase 6, catalytic subunit	0.69979	0.44206	-0.25773	0.2197		0.7803
225427_s_at	APOA1BP	apolipoprotein A-I binding protein	0.58169	0.68649	0.1048	0.7773		0.2227
225430_at	GATC	glutamyl-tRNA(Gln) amidotransferase, subunit C homolog (bacterial)	0.66059	0.78015	0.11956	0.74805		0.25195
225435_at	SSR1	signal sequence receptor, alpha	0.6312	0.81829	0.1871	0.797		0.203
225439_at	NUDCD1	NudC domain containing 1	0.27909	0.78222	0.50314	0.97895		0.02105	0.3
225448_at	NAPG	N-ethylmaleimide-sensitive factor attachment protein, gamma	0.30663	0.70606	0.39943	0.95795		0.04205
225450_at	AMOTL1	angiomotin like 1	0.73763	0.56025	-0.17738	0.15095		0.84905
225455_at	TADA1L	transcriptional adaptor 1 (HFI1 homolog, yeast)-like	0.33331	0.69969	0.36638	0.8081		0.1919
225460_at	SEC22C	SEC22 vesicle trafficking protein homolog C (S. cerevisiae)	0.73631	0.63304	-0.10327	0.21825		0.78175
225478_at	MFHAS1	malignant fibrous histiocytoma amplified sequence 1	0.87371	0.58196	-0.29175	0.2882		0.7118
225485_at	TSGA14	testis specific, 14	0.19398	0.72193	0.52794	0.8894		0.1106
225516_at	SLC7A2	solute carrier family 7 (cationic amino acid transporter, y+ system), member 2	0.71359	0.56994	-0.14365	0.34545		0.65455
225519_at	PPP4R2	protein phosphatase 4, regulatory subunit 2	0.78152	0.1844	-0.59712	0.0288		0.9712
225520_at	MTHFD1L	methylenetetrahydrofolate dehydrogenase (NADP+ dependent) 1-like	0.83058	0.73703	-0.093552	0.29585		0.70415
225521_at	ANAPC7	anaphase promoting complex subunit 7	0.045095	0.71234	0.66725	0.97845		0.02155	0.3
225523_at	MRPL53	mitochondrial ribosomal protein L53	0.71122	0.42754	-0.28368	0.1888		0.8112
225531_at	CABLES1	Cdk5 and Abl enzyme substrate 1	0.67795	0.76513	0.087182	0.6421		0.3579
225537_at	TRAPPC6B	trafficking protein particle complex 6B	0.46175	0.72997	0.26822	0.8086		0.1914
225545_at	EEF2K	eukaryotic elongation factor-2 kinase	0.93149	0.52994	-0.40155	0.0518		0.9482
225546_at	EEF2K	eukaryotic elongation factor-2 kinase	0.92365	0.70977	-0.21388	0.15155		0.84845
225549_at	DDX6	DEAD (Asp-Glu-Ala-Asp) box polypeptide 6	0.64294	0.70524	0.0623	0.61495		0.38505
225577_at	HCG18	HLA complex group 18	0.56362	0.70395	0.14033	0.72125		0.27875
225583_at	UXS1	UDP-glucuronate decarboxylase 1	0.063554	0.65785	0.5943	0.995		0.005	0.25
225605_at	TP53I13	tumor protein p53 inducible protein 13	0.69141	0.10139	-0.59002	0.02005		0.97995
225639_at	SKAP2	src kinase associated phosphoprotein 2	0.25575	0.71541	0.45966	0.9909		0.0091	0.3
225641_at	MEF2D	myocyte enhancer factor 2D	0.75653	0.4962	-0.26033	0.0784		0.9216
225658_at	SPOPL	speckle-type POZ protein-like	0.746	-0.15904	-0.90504	0.01425		0.98575
225697_at	CRKRS	Cdc2-related kinase, arginine/serine-rich	0.84831	0.17898	-0.66933	0.04985		0.95015
225698_at	C5ORF26	chromosome 5 open reading frame 26	0.64826	0.88014	0.23188	0.8982		0.1018
225699_at	C7ORF40	chromosome 7 open reading frame 40	0.24162	0.79427	0.55265	0.93545		0.06455
225717_at	KIAA1715	KIAA1715	0.53283	0.6974	0.16457	0.7498		0.2502
225723_at	C6ORF129	chromosome 6 open reading frame 129	0.81434	0.80729	-0.0070542	0.4969		0.5031
225737_s_at	FBXO22	F-box protein 22	0.69719	0.46313	-0.23406	0.19125		0.80875
225747_at	COQ10A	coenzyme Q10 homolog A (S. cerevisiae)	0.13084	0.68925	0.55841	0.9693		0.0307
225749_at	LOC283951	hypothetical protein LOC283951	0.24909	0.78717	0.53808	0.90745		0.09255
225764_at	ETV6	ets variant 6	0.94349	0.072219	-0.87127	0.05995		0.94005
225768_at	NR1D2	nuclear receptor subfamily 1, group D, member 2	0.69865	0.81849	0.11983	0.7899		0.2101
225788_at	C6ORF153	chromosome 6 open reading frame 153	0.56927	0.69965	0.13038	0.70915		0.29085
225793_at	LIX1L	Lix1 homolog (mouse)-like	0.7429	0.34287	-0.40002	0.0602		0.9398
225795_at	C22ORF32	chromosome 22 open reading frame 32	0.78661	0.92482	0.13821	0.89005		0.10995
225799_at	NCRNA00152	non-protein coding RNA 152	0.33393	0.85308	0.51915	0.9786		0.0214	0.3
225804_at	CYB5D2	cytochrome b5 domain containing 2	0.49007	0.71492	0.22485	0.71155		0.28845
225810_at	MTMR10	myotubularin related protein 10	0.74149	0.041705	-0.69979	0.0042	0.2	0.9958
225812_at	C6ORF225	chromosome 6 open reading frame 225	0.65946	0.80495	0.14549	0.7249		0.2751
225813_at	RC3H2	ring finger and CCCH-type zinc finger domains 2	0.41155	0.8539	0.44235	0.9334		0.0666
225817_at	CGNL1	cingulin-like 1	0.74301	0.72535	-0.017667	0.4952		0.5048
225825_at	C20ORF194	chromosome 20 open reading frame 194	0.69197	0.58051	-0.11146	0.29025		0.70975
225827_at	EIF2C2	eukaryotic translation initiation factor 2C, 2	0.70261	0.13392	-0.56869	0.12395		0.87605
225842_at	PHLDA1	pleckstrin homology-like domain, family A, member 1	0.84385	0.5167	-0.32714	0.0534		0.9466
225845_at	ZBTB44	zinc finger and BTB domain containing 44	0.71263	0.58882	-0.1238	0.2623		0.7377
225857_s_at	LOC388796	hypothetical LOC388796	0.82431	0.89546	0.071147	0.76225		0.23775
225860_at	LOC729580	hypothetical LOC729580	0.57723	0.72978	0.15255	0.72885		0.27115
225862_at	SLC25A26	solute carrier family 25, member 26	0.43378	0.72948	0.2957	0.8619		0.1381
[truncated: 1,244 more rows]
