# Supplementary material for: Altered Gene Synchrony Suggests a Combined Hormone-Mediated Dysregulated State in Major Depression
Source: PubMed Central journal article supplement (PMC2848620; doi:10.1371/journal.pone.0009970), 2010-04-01
Supplement: pone.0009970.s001.pdf [file pone.0009970.s001.pdf]

## **Supplemental information**

### **Altered Gene Synchrony Suggests a Combined Hormone-Mediated Dysregulated State in Major Depression**

Chris Gaiteri<sup>1,2</sup>, Jean-Philippe Guilloux<sup>1,3</sup>, David A. Lewis<sup>1,2</sup> & Etienne Sibille<sup>1,2</sup>

<sup>1</sup> Department of Psychiatry, <sup>2</sup> Center for Neuroscience, University of Pittsburgh, Pittsburgh, Pennsylvania, USA, <sup>3</sup> Université Paris-Sud EA 3544, Faculté de Pharmacie, Châtenay-Malabry cedex F-92296, France.

\* Corresponding author. Department of Psychiatry, University of Pittsburgh, 3811 O'Hara street, BST W1643, Pittsburgh, PA 15213, USA. Tel.; 1 412 624 0804; Fax.: 412-624-9910. E-mail: sibilleel@upmc.edu.

---

| <b>Table of contents</b>                                                | <i>Pages</i> |
|-------------------------------------------------------------------------|--------------|
| <b>1. Cohort description and array parameters (including Table S1).</b> | <i>2-4</i>   |
| <b>2. Table S2. Complete amygdala-cingulate probeset correlations.</b>  | <i>5</i>     |
| <b>3. References</b>                                                    | <i>6</i>     |

---

#### **1. Cohort description and array parameters.**

**1.1. Human cohort 1 (amygdala and cingulate)** was described in details in [1,2]. A brief summary is provided here. In brief, brain samples were obtained during autopsies conducted at the Allegheny County Medical Examiner's Office (Pittsburgh) after consent from next-of-kin. Control subjects did not have an Axis I psychiatric disorder, were antidepressant drug-free and died from natural or accidental causes other than suicide. Subjects with advanced disease stages (i.e., cancer, neurodegenerative disorders) were excluded. Control subjects were paired to each case as closely as possible on age and freezer storage time. (Table S1). For all subjects, consensus DSM-IV diagnoses of MDD were made by an independent committee of experienced clinical research scientists at a case conference utilizing information obtained from clinical records,

toxicology exam and a standardized psychological autopsy [3]. MDD subjects with co-morbid psychiatric disorders were excluded. Antidepressant drug exposure was assessed by clinical data from structured interviews, review of records and toxicology studies. All cases and controls were white Caucasian and were selected for rapid modes of death and short agonal phases, to limit the influence of agonal factors on RNA quality and pH [4]. All selected brains were analyzed for adequate brain pH (>6.4) and RNA integrity by optical density ( $OD \geq 1.6$ ) and Agilent bioanalyzer analysis (Agilent Technologies, Palo Alto, CA; RIN expert scoring system  $\geq 7$ ) as previously described [5]. All procedures were approved by the Institutional Review Board and Committee for Oversight of Research Involving the Dead.

| Pair  | Major depression (MDD) group |      |      |     |         |     | Control group |      |      |     |         |     |
|-------|------------------------------|------|------|-----|---------|-----|---------------|------|------|-----|---------|-----|
|       | Case                         | Age  | PMI  | pH  | Storage | RIN | Case          | Age  | PMI  | pH  | Storage | RIN |
| 1     | 505                          | 57   | 12.8 | 7.1 | 125     | 8.7 | 685           | 57   | 14.0 | 6.6 | 98      | 8.0 |
| 2     | 513                          | 25   | 13.1 | 6.9 | 123     | 7.0 | 789           | 23   | 20.0 | 7.0 | 80      | 7.4 |
| 3     | 598                          | 69   | 5.9  | 7.3 | 111     | 8.8 | 795           | 69   | 12.0 | 6.6 | 102     | 8.2 |
| 4     | 600                          | 64   | 9.9  | 6.7 | 110     | 7.1 | 615           | 62   | 7.2  | 6.4 | 108     | 7.8 |
| 7     | 698                          | 59   | 13.0 | 6.8 | 96      | 9.0 | 713           | 58   | 37.5 | 7.0 | 94      | 8.4 |
| 8     | 783                          | 63   | 11.5 | 6.5 | 82      | 8.8 | 736           | 55   | 15.5 | 6.9 | 88      | 8.3 |
| 9     | 863                          | 52   | 28.3 | 7.2 | 65      | 8.4 | 1086          | 51   | 24.2 | 6.8 | 27      | 8.1 |
| 10    | 868                          | 47   | 10.5 | 6.8 | 64      | 8.1 | 857           | 48   | 16.6 | 6.7 | 66      | 8.9 |
| 11    | 926                          | 57   | 19.0 | 7.0 | 20      | 7.3 | 1122          | 56   | 15.4 | 6.7 | 49      | 7.9 |
| 12    | 1001                         | 54   | 7.3  | 6.6 | 67      | 7.6 | 852           | 54   | 8.0  | 6.8 | 36      | 9.1 |
| 13    | 1049                         | 48   | 5.4  | 6.6 | 30      | 8.4 | 1067          | 49   | 6.0  | 6.6 | 77      | 8.2 |
| 14    | 809                          | 50   | 20.0 | 6.9 | 77      | 8.5 | 1031          | 54   | 23.1 | 6.8 | 35      | 8.2 |
| 15    | 1060                         | 30   | 11.1 | 6.6 | 97      | 8.3 | 604           | 39   | 19.3 | 7.1 | 108     | 8.6 |
| 16    | 943                          | 56   | 15.4 | 6.6 | 26      | 8.2 | 1047          | 43   | 12.0 | 6.9 | 32      | 9.0 |
| Avg   |                              | 52.2 | 13.1 | 6.8 | 77.9    | 8.2 |               | 51.3 | 16.5 | 6.8 | 71.2    | 8.3 |
| Stdev |                              | 12.2 | 6.1  | 0.2 | 35.0    | 0.7 |               | 11.1 | 8.2  | 0.2 | 30.3    | 0.5 |

**Table S1. MDD and control cohorts.** Age (years); PMI, postmortem interval (Hours); Storage, freezer storage at  $-80^{\circ}\text{C}$  (months); RIN, RNA integrity number; Average values for age, PMI, pH, storage time and RNA quality were not different between MDD and control groups (all  $p > 0.05$ ).

**Microarray processing and parameters.** (See details in [2]) Rostral AMY samples enriched in lateral, basolateral and basomedian nuclei were utilized. ACC samples containing all six cortical layers were harvested in rostral subgenual ACC. Total RNA were extracted from frozen samples stored in TRIZOL (Invitrogen, Carlsbad, CA) and processed onto Human Genome U133Plus-2.0 arrays (Affymetrix, Santa Clara, CA) according to manufacturer's protocol. Hybridization and arrays quality control, probeset signals (i.e., transcript level intensities) were extracted with the Affymetrix Microarray GCOS software. For statistical analysis,  $\text{Log}_2$ -transformed probeset signal intensities

were extracted and normalized with the GC- Robust Multi-array Average (GC-RMA) algorithm [6]. Individual scans were visually inspected for the presence of manufacturing defaults and hybridization artifacts. Quality control parameters were as follows: noise (RawQ, ACC,  $1.47\pm 0.34$ ; AMY,  $1.47\pm 0.34$ ), background (ACC,  $44\pm 8$ ; AMY,  $43\pm 5$ ), scale factor (ACC,  $2.62\pm 1.32$ ; AMY,  $4.41\pm 0.97$ ), 3'/5' Actin ratio (ACC,  $2.97\pm 0.98$ ; AMY,  $2.98\pm 0.93$ ) and 3'/5' GAPDH ratio (ACC,  $1.23\pm 0.217$ ; AMY,  $1.45\pm 0.28$ ). Consistent number of genes were detected as present across arrays (ACC,  $46.8\pm 2.2\%$ ; AMY,  $48.2\pm 3.3\%$ ), and consistent detection of BioB/C hybridization spiked controls. See [2] for details.

**1.2. Human cohort 2 (BA9 and 47)** includes 19 control subjects. Subjects description, array parameters and data are available in the three publications listed below. Similar array processing and parameters as in cohort 1 were applied.

- Galfalvy,H.C., Erraji-Benchekroun,L., Smyrniotopoulos,P., Pavlidis,P., Ellis,S.P., Mann,J.J., Sibille,E., and Arango,V. (2003). Sex genes for genomic analysis in human brain: internal controls for comparison of probe level data extraction. *BMC Bioinformatics* 4, 37.

- Sibille,E., Arango,V., Galfalvy,H.C., Pavlidis,P., Erraji-BenChekroun,L., Ellis,S.P., and Mann,J.J. (2004). Gene expression profiling of depression and suicide in human prefrontal cortex. *Neuropsychopharmacology* 29, 351-361.

- Erraji-BenChekroun,L., Underwood,M.D., Arango,V., Galfalvy,H.C., Pavlidis,P., Smyrniotopoulos,P., Mann,J.J., and Sibille,E. (2005). Molecular aging in human prefrontal cortex is selective and continuous throughout adult life. *Biological Psychiatry* 57, 549-558.

## 2. Table S2. Complete AMY-ACC probeset correlations.

Correlation and p-values were computed using the percentile bootstrap (see statistical methods). Genes with p-values that survive a false discovery rate (FDR) cutoff of less than or equal to 30% are noted in 5% increments. Only genes with correlations greater than 0.7 or less than -0.7 in one condition were selected for differential analysis.

**A sample of the table is displayed below. The full table is 37 pages long is available as a separate downloadable Excel file.**

| probeset     | Gene symbol    | Gene Title                                                       | Ctrl R | MDD R  | MDD-Ctrl (ΔR) | Low in MDD p-value | sig. at FDR of . | High in MDD p-value | sig. at FDR of . |
|--------------|----------------|------------------------------------------------------------------|--------|--------|---------------|--------------------|------------------|---------------------|------------------|
| 1053_at      | RFC2           | replication factor C (activator 1) 2, 40kDa                      | 0.435  | 0.892  | 0.456         | 0.9415             |                  | 0.0585              |                  |
| 1552274_at   | PXK            | PX domain containing serine/threonine kinase                     | 0.684  | 0.442  | -0.241        | 0.0808             |                  | 0.9192              |                  |
| 1552283_s_at | ZDHHC11        | zinc finger, DHHC-type containing 11                             | 0.724  | 0.798  | 0.074         | 0.7316             |                  | 0.2684              |                  |
| 1552310_at   | C15ORF40       | chromosome 15 open reading frame 40                              | 0.409  | 0.709  | 0.300         | 0.81605            |                  | 0.18395             |                  |
| 1552426_a_at | TM2D3          | TM2 domain containing 3                                          | 0.303  | 0.700  | 0.396         | 0.9626             |                  | 0.0374              |                  |
| 1552621_at   | POLR2J2        | polymerase (RNA) II (DNA directed) polypeptide J2                | 0.722  | 0.825  | 0.103         | 0.7588             |                  | 0.2412              |                  |
| 1552626_a_at | TMEM163        | transmembrane protein 163                                        | -0.184 | 0.733  | 0.917         | 0.996              |                  | 0.004               | 0.25             |
| 1552701_a_at | CARD16         | caspase recruitment domain family, member 16                     | 0.705  | 0.113  | -0.592        | 0.01815            |                  | 0.98185             |                  |
| 1552722_at   | ARPP-21        | cyclic AMP-regulated phosphoprotein, 21 kD                       | 0.703  | 0.389  | -0.315        | 0.1135             |                  | 0.8865              |                  |
| 1552931_a_at | PDE8A          | phosphodiesterase 8A                                             | 0.699  | 0.469  | -0.230        | 0.2089             |                  | 0.7911              |                  |
| 1553037_a_at | SYN2           | synapsin II                                                      | 0.788  | 0.564  | -0.224        | 0.22755            |                  | 0.77245             |                  |
| 1553108_at   | C5ORF24        | chromosome 5 open reading frame 24                               | 0.749  | 0.089  | -0.661        | 0.0237             |                  | 0.9763              |                  |
| 1553118_at   | THEM4          | thioesterase superfamily member 4                                | 0.715  | 0.549  | -0.166        | 0.24055            |                  | 0.75945             |                  |
| 1553133_at   | C9ORF72        | chromosome 9 open reading frame 72                               | 0.916  | 0.501  | -0.415        | 0.2216             |                  | 0.7784              |                  |
| 1553193_at   | ZNF441         | zinc finger protein 441                                          | 0.765  | 0.476  | -0.289        | 0.19215            |                  | 0.80785             |                  |
| 1553271_at   | DIP2B          | DIP2 disco-interacting protein 2 homolog B (Drosophila)          | 0.396  | 0.707  | 0.311         | 0.90705            |                  | 0.09295             |                  |
| 1553551_s_at | ND2            | NADH dehydrogenase, subunit 2 (complex I)                        | 0.696  | -0.218 | -0.914        | 0.0037             | 0.2              | 0.9963              |                  |
| 1553677_a_at | TIPRL          | TIP41, TOR signaling pathway regulator-like (S. cerevisiae)      | 0.671  | 0.747  | 0.076         | 0.60555            |                  | 0.39445             |                  |
| 1553704_x_at | ZNF791         | zinc finger protein 791                                          | 0.699  | 0.570  | -0.129        | 0.2681             |                  | 0.7319              |                  |
| 1553796_at   | FLJ30594       | hypothetical locus FLJ30594                                      | 0.730  | -0.043 | -0.774        | 0.00125            | 0.2              | 0.99875             |                  |
| 1553864_at   | DKFZP761H212   | hypothetical protein DKFZp761H2121                               | 0.272  | 0.771  | 0.499         | 0.988              |                  | 0.012               | 0.3              |
| 1553971_a_at | TCAG7.1177     | opposite strand transcription unit to STAG3                      | 0.339  | 0.800  | 0.461         | 0.92145            |                  | 0.07855             |                  |
| 1554004_a_at | RGNEF          | Rho-guanine nucleotide exchange factor                           | 0.070  | 0.887  | 0.817         | 0.99725            |                  | 0.00275             | 0.25             |
| 1554018_at   | GPNNMB         | glycoprotein (transmembrane) nmb                                 | 0.806  | 0.686  | -0.120        | 0.2927             |                  | 0.7073              |                  |
| 1554093_a_at | SNAPC5         | small nuclear RNA activating complex, polypeptide 5, 19kDa       | 0.557  | 0.734  | 0.177         | 0.6309             |                  | 0.3691              |                  |
| 1554181_at   | SNX32          | sorting nexin 32                                                 | 0.645  | 0.757  | 0.112         | 0.68115            |                  | 0.31885             |                  |
| 1554287_at   | TRIM4          | tripartite motif-containing 4                                    | -0.169 | 0.804  | 0.972         | 0.99695            |                  | 0.00305             | 0.25             |
| 1554306_at   | ITPKB          | inositol 1,4,5-trisphosphate 3-kinase B                          | 0.885  | 0.237  | -0.647        | 0.1234             |                  | 0.8766              |                  |
| 1554351_a_at | TIPRL          | TIP41, TOR signaling pathway regulator-like (S. cerevisiae)      | 0.677  | 0.698  | 0.021         | 0.5454             |                  | 0.4546              |                  |
| 1554452_a_at | HIG2           | hypoxia-inducible protein 2                                      | 0.996  | 0.263  | -0.733        | 0.074              |                  | 0.926               |                  |
| 1554482_a_at | SAR1B          | SAR1 homolog B (S. cerevisiae)                                   | 0.721  | -0.104 | -0.825        | 0.0044             | 0.2              | 0.9956              |                  |
| 1554509_a_at | C10ORF97       | chromosome 10 open reading frame 97                              | 0.364  | 0.776  | 0.412         | 0.89985            |                  | 0.10015             |                  |
| 1554593_s_at | SLC1A6         | solute carrier family 1 (high affinity aspartate/glutamate trans | 0.204  | 0.692  | 0.488         | 0.926              |                  | 0.074               |                  |
| 1554643_at   | RGS11          | regulator of G-protein signaling 11                              | 0.184  | 0.731  | 0.547         | 0.81055            |                  | 0.18945             |                  |
| 1554689_a_at | NLGN4X         | neuroligin 4, X-linked                                           | 0.829  | 0.244  | -0.585        | 0.0041             | 0.2              | 0.9959              |                  |
| 1554706_at   | OR2L13         | olfactory receptor, family 2, subfamily L, member 13             | 0.627  | 0.824  | 0.197         | 0.779              |                  | 0.221               |                  |
| 1554747_a_at | 2-Sep          | septin 2                                                         | 0.845  | 0.179  | -0.666        | 0.0007             | 0.15             | 0.9993              |                  |
| 1554789_a_at | PDE8B          | phosphodiesterase 8B                                             | 0.682  | 0.645  | -0.037        | 0.444              |                  | 0.556               |                  |
| 1554801_at   | C5ORF40        | chromosome 5 open reading frame 40                               | 0.133  | 0.806  | 0.672         | 0.99395            |                  | 0.00605             | 0.25             |
| 1554810_at   | PLA2G4C(includ | phospholipase A2, group IVC (cytosolic, calcium-independe        | 0.058  | 0.840  | 0.781         | 0.9114             |                  | 0.0886              |                  |
| 1555123_at   | ST6GAL2        | ST6 beta-galactosamide alpha-2,6-sialyltransferase 2             | 0.528  | 0.680  | 0.152         | 0.82325            |                  | 0.17675             |                  |
| 1555241_at   | C8ORF59        | chromosome 8 open reading frame 59                               | 0.781  | 0.603  | -0.179        | 0.2401             |                  | 0.7599              |                  |
| 1555311_at   | RAB22A         | RAB22A, member RAS oncogene family                               | 0.092  | 0.796  | 0.704         | 0.92255            |                  | 0.07745             |                  |
| 1555318_at   | HIF3A          | hypoxia inducible factor 3, alpha subunit                        | 0.852  | 0.364  | -0.488        | 0.0333             |                  | 0.9667              |                  |
| 1555363_s_at | MGC39821       | hypothetical protein MGC39821                                    | 0.718  | 0.051  | -0.667        | 0.06545            |                  | 0.93455             |                  |
| 1555618_s_at | SAE1           | SUMO1 activating enzyme subunit 1                                | 0.681  | 0.539  | -0.142        | 0.30315            |                  | 0.69685             |                  |
| 1555653_at   | HNRNPA3        | heterogeneous nuclear ribonucleoprotein A3                       | 0.794  | 0.427  | -0.367        | 0.07               |                  | 0.93                |                  |
| 1555764_s_at | TIMM10         | translocase of inner mitochondrial membrane 10 homolog (Y        | 0.408  | 0.742  | 0.334         | 0.8313             |                  | 0.1687              |                  |
| 1555812_a_at | ARHGDI8        | Rho GDP dissociation inhibitor (GDI) beta                        | 0.697  | 0.249  | -0.447        | 0.11165            |                  | 0.88835             |                  |
| 1555832_s_at | KLF6           | Kruppel-like factor 6                                            | 0.752  | 0.730  | -0.022        | 0.43015            |                  | 0.56985             |                  |
| 1555847_a_at | LOC284454      | hypothetical protein LOC284454                                   | 0.238  | 0.803  | 0.565         | 0.70435            |                  | 0.29565             |                  |
| 1555881_s_at | LZTS2          | leucine zipper, putative tumor suppressor 2                      | 0.206  | 0.723  | 0.517         | 0.9575             |                  | 0.0425              |                  |
| 1555892_s_at | LOC253039      | hypothetical LOC253039                                           | 0.886  | 0.798  | -0.089        | 0.1896             |                  | 0.8104              |                  |

### 3. Reference List

1. Sibille E, Arango V, Joeyen-Waldorf J, Wang Y, Leman S *et al* (2008) Large-scale estimates of cellular origins of mRNAs: Enhancing the yield of transcriptome analyses. *J Neurosci Methods* 1672: 198-206.
2. Sibille E, Wang Y, Joeyen-Waldorf J, Gaiteri C, Surget A *et al* (2009) A molecular signature of depression in the amygdala. *Am J Psychiatry* 1669: 1011-1024.
3. Glantz LA, Lewis DA (1997) Reduction of synaptophysin immunoreactivity in the prefrontal cortex of subjects with schizophrenia. Regional and diagnostic specificity. *Arch Gen Psychiatry* 547: 660-669.
4. Tomita H, Vawter MP, Walsh DM, Evans SJ, Choudary PV *et al* (2004) Effect of agonal and postmortem factors on gene expression profile: quality control in microarray analyses of postmortem human brain. *Biol Psychiatry* 554: 346-352.
5. Eggen SM, Hashimoto T, Lewis DA (2008) Reduced cortical cannabinoid 1 receptor messenger RNA and protein expression in schizophrenia. *Arch Gen Psychiatry* 657: 772-784.
6. Irizarry RA, Bolstad BM, Collin F, Cope LM, Hobbs B *et al* (2003) Summaries of Affymetrix GeneChip probe level data. *Nucleic Acids Res* 314: e15.
